# Supplementary material for: Eligibility and subsequent burden of cardiovascular disease of four strategies for blood pressure-lowering treatment: a retrospective cohort study
Source: PubMed Central journal article supplement (PMC6717081; doi:10.1016/s0140-6736(19)31359-5), 2019-08-24
Supplement: mmc1.pdf [file mmc1.pdf]

# THE LANCET

## Supplementary appendix

This appendix formed part of the original submission and has been peer reviewed. We post it as supplied by the authors.

Supplement to: Herrett E, Gadd S, Jackson R, et al. Eligibility and subsequent burden of cardiovascular disease of four strategies for blood pressure-lowering treatment: a retrospective cohort study. *Lancet* 2019; published online July 25. [http://dx.doi.org/10.1016/S0140-6736\(19\)31359-5](http://dx.doi.org/10.1016/S0140-6736(19)31359-5).

## **Contents**

|                                                            |    |
|------------------------------------------------------------|----|
| Additional information .....                               | 2  |
| Additional Tables .....                                    | 3  |
| Additional Figures .....                                   | 11 |
| Code lists for use with CPRD, HES and ONS data .....       | 19 |
| Medical code list for cardiovascular disease in CPRD ..... | 19 |
| ICD10 code list for cardiovascular disease .....           | 48 |
| OPCS code list for cardiovascular disease .....            | 54 |
| Target organ damage Read codes .....                       | 61 |
| ISAC protocol.....                                         | 65 |
| RECORD statement.....                                      | 79 |

## Additional information

### Calculation of Number of patients treated for ten years per event avoided

This metric was calculated in order to compare the efficiency of each strategy. For each strategy, it was calculated as:

$$\frac{\text{number of patients eligible for treatment}}{\text{number of events potentially avoided if all eligible patients were treated}}$$

#### *Number of patients eligible for treatment*

This was estimated earlier for each strategy, see main text.

#### *Number of events potentially avoided if all eligible patients were treated*

This was calculated for eligible patients based on their treatment status at cohort entry. For untreated patients, this was the number that we would avoid if they were treated, and treated patients, this was the number that had already been avoided by treatment.

For *untreated* eligible patients, the number that would be avoided under this strategy was estimated as 20% of the expected number of cardiovascular disease events over ten years, calculated from the crude rate among the untreated eligible patients. So for each strategy:

(crude rate among eligible untreated x 10 years x number of untreated patients x 0.2)

The 20% reduction in events was based on evidence that lowering SBP by 10mmHg with drugs reduces cardiovascular disease risk by 20% in all patients, over about 5 years[7]).

*For example, calculations for the NICE strategy were as follows:*

*In our cohort there were 81,562 untreated eligible patients for the NICE strategy, and the crude rate of CVD in this group was 15.42 per 1000 person years.*

*Therefore under a scenario where all eligible patients were treated, there would be:*

*15.42/1000 x 10 years x 81,562 x 0.2 = 2515.2 events avoided in the cohort over ten years.*

We assumed that *treated* patients were already receiving their 20% treatment benefit. Therefore, as a group, they were experiencing 80% of the events compared to a scenario in which they were not treated (so multiply by a factor of 100/80 to get events expected if *untreated*). Then, the number they avoided due to treatment for ten years was estimated as 20% of this. The overall calculation for this group is therefore:

(crude rate among eligible treated x 10 years x number of treated patients x 100/80 x 0.2).

*For example, calculations for the NICE strategy were as follows:*

*In our cohort there were 190,401 treated eligible patients for the NICE strategy and the crude rate of CVD in this group was 15.1 per 1000 person years.*

*Therefore under a scenario where all eligible patients were treated, there would be:*

*15.12/1000 x 10 years x 190,401 x 100/80 x 0.2 = 7199.5 events avoided in the cohort over ten years.*

These two figures were summed to estimate total number of events potentially avoided due to treatment.

All estimates were scaled to the UK population. This was done by multiplying our estimates by 24. (Our original sample of CPRD data, before exclusion criteria were applied, was 2.7 million patients (see Appendix Figure 1), representing approximately 1/24<sup>th</sup> of the UK population in 2011.)

*So for our example calculation for the NICE strategy:*

*Events avoided among untreated patients: 2515.2 x 24 = 60,364 events avoided in the UK over ten years; and among treated patients: 7199.5 x 24 = 172,788 events avoided in the UK over ten years.*

*Therefore the number potentially avoided due to treatment is 60,364 + 172,788 = 233,152.*

## **Additional Tables**

**Appendix Table 1. Full demographic and risk factor characteristics at cohort entry for the whole cohort, and for patients eligible and ineligible for blood pressure lowering treatment under each strategy (blood pressure  $\geq 140/90$ mmHg, current NICE guidelines, QRISK2 ten year risk  $\geq 10\%$ ).**

|                                                 | Whole cohort |           | Eligibility strategy 1, Blood pressure $\geq 140/90$ mmHg |            | Eligibility strategy 2, NICE guidelines 2011 |            | Eligibility strategy 3, NICE guidelines 2019 |            | Eligibility strategy 4, QRISK2 ten year risk $\geq 10\%$ |            |         |           |         |           |         |           |         |           |
|-------------------------------------------------|--------------|-----------|-----------------------------------------------------------|------------|----------------------------------------------|------------|----------------------------------------------|------------|----------------------------------------------------------|------------|---------|-----------|---------|-----------|---------|-----------|---------|-----------|
|                                                 |              |           | Eligible                                                  | Ineligible | Eligible                                     | Ineligible | Eligible                                     | Ineligible | Eligible                                                 | Ineligible |         |           |         |           |         |           |         |           |
| <b>N</b>                                        | 1,222,670    | (100)     | 481,859                                                   | (39.4)     | 740,811                                      | (60.6)     | 271,963                                      | (22.2)     | 950,707                                                  | (77.8)     | 327,429 | (26.8)    | 895,241 | (73.2)    | 357,840 | (29.3)    | 864,830 | (70.7)    |
| <b>Time in follow-up in years, median (IQR)</b> | 4.3          | (2.5-5.2) | 4.3                                                       | (2.5-5.2)  | 4.3                                          | (2.5-5.2)  | 4.2                                          | (2.5-5.2)  | 4.3                                                      | (2.5-5.2)  | 4       | (2.5-5.2) | 4.3     | (2.5-5.2) | 3.9     | (2.4-5.2) | 4.3     | (2.6-5.2) |
| <b>Gender, n (%)</b>                            |              |           |                                                           |            |                                              |            |                                              |            |                                                          |            |         |           |         |           |         |           |         |           |
| Male                                            | 530,618      | (43.4)    | 242,423                                                   | (50.3)     | 288,195                                      | (38.9)     | 134,958                                      | (49.6)     | 395,660                                                  | (41.6)     | 168,143 | (51.4)    | 362,475 | (40.5)    | 209,882 | (58.7)    | 320,736 | (37.1)    |
| Female                                          | 692,052      | (56.6)    | 239,436                                                   | (49.7)     | 452,616                                      | (61.1)     | 137,005                                      | (50.4)     | 555,047                                                  | (58.4)     | 159,286 | (48.6)    | 532,766 | (59.5)    | 147,958 | (41.3)    | 544,094 | (62.9)    |
| <b>Age group at entry, n(%)</b>                 |              |           |                                                           |            |                                              |            |                                              |            |                                                          |            |         |           |         |           |         |           |         |           |
| 30-39                                           | 251,294      | (20.6)    | 38,399                                                    | (8)        | 212,895                                      | (28.7)     | 9,270                                        | (3.4)      | 242,024                                                  | (25.5)     | 9,293   | (2.8)     | 242,001 | (27)      | 709     | (0.2)     | 250,585 | (29)      |
| 40-49                                           | 317,280      | (25.9)    | 86,909                                                    | (18)       | 230,371                                      | (31.1)     | 31,623                                       | (11.6)     | 285,657                                                  | (30)       | 32,737  | (10)      | 284,543 | (31.8)    | 9,397   | (2.6)     | 307,883 | (35.6)    |
| 50-59                                           | 281,786      | (23)      | 121,185                                                   | (25.1)     | 160,601                                      | (21.7)     | 58,146                                       | (21.4)     | 223,640                                                  | (23.5)     | 69,414  | (21.2)    | 212,372 | (23.7)    | 55,263  | (15.4)    | 226,523 | (26.2)    |
| 60-69                                           | 238,774      | (19.5)    | 139,937                                                   | (29)       | 98,837                                       | (13.3)     | 87,968                                       | (32.3)     | 150,806                                                  | (15.9)     | 120,577 | (36.8)    | 118,197 | (13.2)    | 159,184 | (44.5)    | 79,590  | (9.2)     |
| 70-79                                           | 133,536      | (10.9)    | 95,429                                                    | (19.8)     | 38,107                                       | (5.1)      | 84,956                                       | (31.2)     | 48,580                                                   | (5.1)      | 95,408  | (29.1)    | 38,128  | (4.3)     | 133,287 | (37.2)    | 249     | (0)       |
| <b>Ethnicity, n (%)</b>                         |              |           |                                                           |            |                                              |            |                                              |            |                                                          |            |         |           |         |           |         |           |         |           |
| White or NS                                     | 949,614      | (77.7)    | 381,609                                                   | (79.2)     | 568,005                                      | (76.7)     | 218,171                                      | (80.2)     | 731,443                                                  | (76.9)     | 262,905 | (80.3)    | 686,709 | (76.7)    | 292,506 | (81.7)    | 657,108 | (76)      |
| Indian                                          | 15,289       | (1.3)     | 4,299                                                     | (0.9)      | 10,990                                       | (1.5)      | 2,537                                        | (0.9)      | 12,752                                                   | (1.3)      | 2,922   | (0.9)     | 12,367  | (1.4)     | 3,618   | (1)       | 11,671  | (1.3)     |
| Pakistani                                       | 5,565        | (0.5)     | 1,267                                                     | (0.3)      | 4,298                                        | (0.6)      | 767                                          | (0.3)      | 4,798                                                    | (0.5)      | 889     | (0.3)     | 4,676   | (0.5)     | 1,369   | (0.4)     | 4,196   | (0.5)     |
| Bangladeshi                                     | 1,862        | (0.2)     | 385                                                       | (0.1)      | 1,477                                        | (0.2)      | 251                                          | (0.1)      | 1,611                                                    | (0.2)      | 279     | (0.1)     | 1,583   | (0.2)     | 407     | (0.1)     | 1,455   | (0.2)     |
| Other Asian                                     | 10,541       | (0.9)     | 2,679                                                     | (0.6)      | 7,862                                        | (1.1)      | 1,385                                        | (0.5)      | 9,156                                                    | (1)        | 1,620   | (0.5)     | 8,921   | (1)       | 1,822   | (0.5)     | 8,719   | (1)       |
| Black Caribbean                                 | 6,168        | (0.5)     | 2,543                                                     | (0.5)      | 3,625                                        | (0.5)      | 1,530                                        | (0.6)      | 4,638                                                    | (0.5)      | 1,677   | (0.5)     | 4,491   | (0.5)     | 1,289   | (0.4)     | 4,879   | (0.6)     |
| Black African                                   | 10,591       | (0.9)     | 3,289                                                     | (0.7)      | 7,302                                        | (1)        | 1,578                                        | (0.6)      | 9,013                                                    | (0.9)      | 1,676   | (0.5)     | 8,915   | (1)       | 719     | (0.2)     | 9,872   | (1.1)     |
| Chinese                                         | 2,922        | (0.2)     | 594                                                       | (0.1)      | 2,328                                        | (0.3)      | 290                                          | (0.1)      | 2,632                                                    | (0.3)      | 326     | (0.1)     | 2,596   | (0.3)     | 267     | (0.1)     | 2,655   | (0.3)     |
| Other ethnic group                              | 220,118      | (18)      | 85,194                                                    | (17.7)     | 134,924                                      | (18.2)     | 45,454                                       | (16.7)     | 174,664                                                  | (18.4)     | 55,135  | (16.8)    | 164,983 | (18.4)    | 55,843  | (15.6)    | 164,275 | (19)      |
| <b>QRISK2 score, n (%)</b>                      |              |           |                                                           |            |                                              |            |                                              |            |                                                          |            |         |           |         |           |         |           |         |           |
| <10%                                            | 864,830      | (70.7)    | 235,788                                                   | (48.9)     | 629,042                                      | (84.9)     | 81,358                                       | (29.9)     | 783,472                                                  | (82.4)     | 81,358  | (24.8)    | 783,472 | (87.5)    | 0       | (0)       | 864,830 | (100)     |
| 10-19%                                          | 216,349      | (17.7)    | 136,578                                                   | (28.3)     | 79,771                                       | (10.8)     | 81,112                                       | (29.8)     | 135,237                                                  | (14.2)     | 136,578 | (41.7)    | 79,771  | (8.9)     | 216,349 | (60.5)    | 0       | (0)       |
| 20-29%                                          | 95,167       | (7.8)     | 71,019                                                    | (14.7)     | 24,148                                       | (3.3)      | 71,019                                       | (26.1)     | 24,148                                                   | (2.5)      | 71,019  | (21.7)    | 24,148  | (2.7)     | 95,167  | (26.6)    | 0       | (0)       |
| $\geq 30\%$                                     | 46,324       | (3.8)     | 38,474                                                    | (8)        | 7,850                                        | (1.1)      | 38,474                                       | (14.1)     | 7,850                                                    | (0.8)      | 38,474  | (11.8)    | 7,850   | (0.9)     | 46,324  | (12.9)    | 0       | (0)       |
| <b>Townsend quintile, n (%)</b>                 |              |           |                                                           |            |                                              |            |                                              |            |                                                          |            |         |           |         |           |         |           |         |           |
| 1                                               | 302,731      | (24.8)    | 116,036                                                   | (24.1)     | 186,695                                      | (25.2)     | 61,221                                       | (22.5)     | 241,510                                                  | (25.4)     | 75,007  | (22.9)    | 227,724 | (25.4)    | 80,653  | (22.5)    | 222,078 | (25.7)    |
| 2                                               | 207,932      | (17)      | 82,712                                                    | (17.2)     | 125,220                                      | (16.9)     | 44,987                                       | (16.5)     | 162,945                                                  | (17.1)     | 55,176  | (16.9)    | 152,756 | (17.1)    | 60,879  | (17)      | 147,053 | (17)      |
| 3                                               | 250,157      | (20.5)    | 96,055                                                    | (19.9)     | 154,102                                      | (20.8)     | 51,991                                       | (19.1)     | 198,166                                                  | (20.8)     | 63,341  | (19.3)    | 186,816 | (20.9)    | 68,831  | (19.2)    | 181,326 | (21)      |
| 4                                               | 224,100      | (18.3)    | 100,524                                                   | (20.9)     | 123,576                                      | (16.7)     | 64,615                                       | (23.8)     | 159,485                                                  | (16.8)     | 75,032  | (22.9)    | 149,068 | (16.7)    | 80,245  | (22.4)    | 143,855 | (16.6)    |
| 5                                               | 237,750      | (19.4)    | 86,532                                                    | (18)       | 151,218                                      | (20.4)     | 49,149                                       | (18.1)     | 188,601                                                  | (19.8)     | 58,873  | (18)      | 178,877 | (20)      | 67,232  | (18.8)    | 170,518 | (19.7)    |

\*closest measure prior to cohort entry on 1st January 2011

\*\*closest measure prior to cohort entry on 1st January 2011, and either systolic or diastolic blood pressure met criteria

Continued...

**Appendix Table 1 continued**

|  | Whole cohort | Eligibility strategy 1, Blood pressure $\geq 140/90$ mmHg | Eligibility strategy 2, NICE guidelines 2011 | Eligibility strategy 3, NICE guidelines 2019 | Eligibility strategy 4, QRISK2 ten year risk $\geq 10\%$ |
|--|--------------|-----------------------------------------------------------|----------------------------------------------|----------------------------------------------|----------------------------------------------------------|
|--|--------------|-----------------------------------------------------------|----------------------------------------------|----------------------------------------------|----------------------------------------------------------|

|                                                        | Eligible |             | Ineligible |        | Eligible |        | Ineligible |        | Eligible |        | Ineligible |             | Eligible |             | Ineligible |             |         |             |
|--------------------------------------------------------|----------|-------------|------------|--------|----------|--------|------------|--------|----------|--------|------------|-------------|----------|-------------|------------|-------------|---------|-------------|
| <b>Family history cardiovascular disease, n (%)</b>    | 97,120   | (7.9)       | 38,868     | (8.1)  | 58,252   | (7.9)  | 21,777     | (8)    | 75,343   | (7.9)  | 27,826     | (8.5)       | 69,294   | (7.7)       | 35,154     | (9.8)       | 61,966  | (7.2)       |
| <b>Diabetes, n (%)</b>                                 | 137,419  | (11.2)      | 76,897     | (16)   | 60,522   | (8.2)  | 76,897     | (28.3) | 60,522   | (6.4)  | 76,897     | (23.5)      | 60,522   | (6.8)       | 80,058     | (22.4)      | 57,361  | (6.6)       |
| <b>Smoking status, n (%)</b>                           |          |             |            |        |          |        |            |        |          |        |            |             |          |             |            |             |         |             |
| Non smoker                                             | 688,168  | (56.3)      | 266,013    | (55.2) | 422,155  | (57)   | 145,484    | (53.5) | 542,684  | (57.1) | 172,148    | (52.6)      | 516,020  | (57.6)      | 167,630    | (46.8)      | 520,538 | (60.2)      |
| Ex smoker                                              | 290,181  | (23.7)      | 131,345    | (27.3) | 158,836  | (21.4) | 82,322     | (30.3) | 207,859  | (21.9) | 99,325     | (30.3)      | 190,856  | (21.3)      | 116,105    | (32.4)      | 174,076 | (20.1)      |
| Light smoker                                           | 11,025   | (0.9)       | 3,245      | (0.7)  | 7,780    | (1.1)  | 1,553      | (0.6)  | 9,472    | (1)    | 1,970      | (0.6)       | 9,055    | (1)         | 2,480      | (0.7)       | 8,545   | (1)         |
| Moderate smoker                                        | 222,021  | (18.2)      | 77,239     | (16)   | 144,782  | (19.5) | 41,091     | (15.1) | 180,930  | (19)   | 51,923     | (15.9)      | 170,098  | (19)        | 69,039     | (19.3)      | 152,982 | (17.7)      |
| Heavy smoker                                           | 4,210    | (0.3)       | 1,605      | (0.3)  | 2,605    | (0.4)  | 849        | (0.3)  | 3,361    | (0.4)  | 1,106      | (0.3)       | 3,104    | (0.3)       | 1,553      | (0.4)       | 2,657   | (0.3)       |
| Missing                                                | 7,065    | (0.6)       | 2,412      | (0.5)  | 4,653    | (0.6)  | 664        | (0.2)  | 6,401    | (0.7)  | 957        | (0.3)       | 6,108    | (0.7)       | 1,033      | (0.3)       | 6,032   | (0.7)       |
|                                                        |          |             |            | (25.1- |          | (23.2- |            | (25.5- |          | (23.5- |            |             |          |             |            |             |         |             |
| <b>BMI, median (IQR)</b>                               | 26.6     | (23.8-30.3) | 28         | 32)    | 25.7     | 29)    | 28.6       | 32.7)  | 26.1     | 29.5)  | 28         | (25.3-32.2) | 26       | (23.4-29.4) | 27.6       | (24.8-31.1) | 26.2    | (23.5-29.9) |
| Missing                                                | 149,054  | (12.2)      | 44,283     | (9.2)  | 104,771  | (14.1) | 18,327     | (6.7)  | 130,727  | (13.8) | 24,553     | (7.5)       | 124,501  | (13.9)      | 31,051     | (8.7)       | 118,003 | (13.6)      |
| <b>Total: HDL cholesterol ratio, mean (SD)</b>         | 3.9      | (1.2)       | 3.9        | (1.2)  | 3.9      | (1.2)  | 3.9        | (1.2)  | 3.9      | (1.2)  | 3.9        | (1.2)       | 3.9      | (1.2)       | 4          | (1.3)       | 3.8     | (1.2)       |
| Missing                                                | 750,733  | (61.4)      | 228,675    | (47.5) | 522,058  | (70.5) | 99,156     | (36.5) | 651,577  | (68.5) | 126,842    | (38.7)      | 623,891  | (69.7)      | 144,303    | (40.3)      | 606,430 | (70.1)      |
| <b>Systolic blood pressure, mmHg, n (%)*</b>           |          |             |            |        |          |        |            |        |          |        |            |             |          |             |            |             |         |             |
| <110                                                   | 100,345  | (8.2)       | 2,876      | (0.6)  | 97,469   | (13.2) | 2,348      | (0.9)  | 97,997   | (10.3) | 2,489      | (0.8)       | 97,856   | (10.9)      | 6,660      | (1.9)       | 93,685  | (10.8)      |
| 110-119                                                | 187,402  | (15.3)      | 13,123     | (2.7)  | 174,279  | (23.5) | 9,929      | (3.7)  | 177,473  | (18.7) | 10,610     | (3.2)       | 176,792  | (19.7)      | 21,811     | (6.1)       | 165,591 | (19.1)      |
| 120-139                                                | 603,024  | (49.3)      | 133,961    | (27.8) | 469,063  | (63.3) | 92,186     | (33.9) | 510,838  | (53.7) | 100,308    | (30.6)      | 502,716  | (56.2)      | 162,640    | (45.5)      | 440,384 | (50.9)      |
| 140-159                                                | 289,745  | (23.7)      | 289,745    | (60.1) | 0        | (0)    | 125,346    | (46.1) | 164,399  | (17.3) | 171,868    | (52.5)      | 117,877  | (13.2)      | 139,895    | (39.1)      | 149,850 | (17.3)      |
| 160-179                                                | 35,618   | (2.9)       | 35,618     | (7.4)  | 0        | (0)    | 35,618     | (13.1) | 0        | (0)    | 35,618     | (10.9)      | 0        | (0)         | 21,939     | (6.1)       | 13,679  | (1.6)       |
| ≥180                                                   | 6,536    | (0.5)       | 6,536      | (1.4)  | 0        | (0)    | 6,536      | (2.4)  | 0        | (0)    | 6,536      | (2)         | 0        | (0)         | 4,895      | (1.4)       | 1,641   | (0.2)       |
| <b>Systolic blood pressure, mean (SD)*</b>             | 129.2    | (15.6)      | 141.9      | (12.9) | 120.9    | (11)   | 142.4      | (15.6) | 125.4    | (13.4) | 142.5      | (14.6)      | 124      | (13)        | 137.5      | (14.8)      | 125.8   | (14.7)      |
| <b>Diastolic blood pressure, mean (SD)*</b>            | 78.2     | (9.5)       | 83.4       | (9.5)  | 74.9     | (7.9)  | 82.5       | (10.7) | 77       | (8.8)  | 82.5       | (10.2)      | 77       | (8.7)       | 79.3       | (9.3)       | 77.8    | (9.6)       |
| <b>Using blood pressure lowering medication, n (%)</b> | 223,465  | (18.3)      | 213,046    | (44.2) | 10,419   | (1.4)  | 190,401    | (70)   | 33,064   | (3.5)  | 200,214    | (61.1)      | 23,251   | (2.6)       | 153,586    | (42.9)      | 69,879  | (8.1)       |
| <b>Using statins, n (%)</b>                            | 124,380  | (10.2)      | 96,703     | (20.1) | 27,677   | (3.7)  | 83,808     | (30.8) | 40,572   | (4.3)  | 91,206     | (27.9)      | 33,174   | (3.7)       | 95,170     | (26.6)      | 29,210  | (3.4)       |
| <b>Rheumatoid arthritis, n (%)</b>                     | 11,233   | (0.9)       | 5,889      | (1.2)  | 5,344    | (0.7)  | 4,460      | (1.6)  | 6,773    | (0.7)  | 5,124      | (1.6)       | 6,109    | (0.7)       | 6,553      | (1.8)       | 4,680   | (0.5)       |
| <b>Atrial fibrillation, n (%)</b>                      | 12,712   | (1)         | 8,929      | (1.9)  | 3,783    | (0.5)  | 8,127      | (3)    | 4,585    | (0.5)  | 8,736      | (2.7)       | 3,976    | (0.4)       | 11,646     | (3.3)       | 1,066   | (0.1)       |
| <b>Renal disease, n (%)</b>                            | 49,744   | (4.1)       | 36,245     | (7.5)  | 13,499   | (1.8)  | 36,245     | (13.3) | 13,499   | (1.4)  | 36,245     | (11.1)      | 13,499   | (1.5)       | 36,671     | (10.2)      | 13,073  | (1.5)       |
| <b>Proteinuria, n (%)</b>                              | 9,713    | (0.8)       | 5,581      | (1.2)  | 4,132    | (0.6)  | 5,581      | (2.1)  | 4,132    | (0.4)  | 5,581      | (1.7)       | 4,132    | (0.5)       | 4,813      | (1.3)       | 4,900   | (0.6)       |
| <b>Hypertensive retinopathy, n (%)</b>                 | 544      | (0)         | 483        | (0.1)  | 61       | (0)    | 483        | (0.2)  | 61       | (0)    | 483        | (0.1)       | 61       | (0)         | 377        | (0.1)       | 167     | (0)         |

\*closest measure prior to cohort entry on 1st January 2011

\*\*closest measure prior to cohort entry on 1st January 2011, and either systolic or diastolic blood pressure met criteria

**Appendix table 2. Number and proportion of patients in the UK who would gain and lose eligibility for blood pressure lowering treatment under each strategy (blood pressure  $\geq 140/90$ mmHg, NICE guidelines 2019, QRISK2 ten year risk  $\geq 10\%$ ) compared to the NICE 2011 guideline.**

|                                   | n (%) in the UK population that would lose eligibility for treatment | n (%) in the UK population that would gain eligibility for treatment | Total n (%) patients in the UK population whose treatment eligibility would change | Net increase in eligibility in the UK population, n (%) |
|-----------------------------------|----------------------------------------------------------------------|----------------------------------------------------------------------|------------------------------------------------------------------------------------|---------------------------------------------------------|
| Blood pressure $\geq 140/90$ mmHg | 0 (0)                                                                | 5,037,504 (17.2)                                                     | 5,037,504 (17.2)                                                                   | 5,037,504 (17.2)                                        |
| NICE guidelines 2019              | 0 (0)                                                                | 1,331,184 (4.5)                                                      | 1,331,184 (4.5)                                                                    | 1,331,184 (4.5)                                         |
| QRISK2 ten year risk $\geq 10\%$  | 1,952,592 (6.7)                                                      | 4,013,640 (13.7)                                                     | 5,966,232 (20.3)                                                                   | 2,061,048 (7)                                           |

**Appendix Table 3. Treatment and control of blood pressure to below 140/90 mmHg in patients eligible for treatment under each strategy.**

|                                      | Patients eligible for blood pressure lowering treatment under: |        |                                                  |        |                                               |        |                                               |        |                                                    |        |
|--------------------------------------|----------------------------------------------------------------|--------|--------------------------------------------------|--------|-----------------------------------------------|--------|-----------------------------------------------|--------|----------------------------------------------------|--------|
|                                      | Whole cohort,<br>n (%)                                         |        | Strategy 1, Blood pressure<br>≥140/90mmHg, n (%) |        | Strategy 2, NICE guidelines<br>2011,<br>n (%) |        | Strategy 2, NICE guidelines<br>2019,<br>n (%) |        | Strategy 4, QRISK2 ten year<br>risk ≥10%,<br>n (%) |        |
| <b>Treated at cohort entry</b>       | 223,465                                                        | (18.3) | 213,046                                          | (44.2) | 190,401                                       | (70)   | 200,214                                       | (61.1) | 153,586                                            | (43)   |
| <i>Blood pressure &lt;140/90mmHg</i> | 117,030                                                        | (9.6)  | 106,611                                          | (22.1) | 93,132                                        | (34.2) | 98,654                                        | (30.1) | 74,996                                             | (21)   |
| <i>Blood pressure ≥140/90mmHg</i>    | 106,435                                                        | (8.7)  | 106,435                                          | (22.1) | 97,269                                        | (35.8) | 101,560                                       | (31)   | 78,590                                             | (22)   |
| <b>Untreated at cohort entry</b>     | 999,205                                                        | (81.7) | 268,813                                          | (55.8) | 81,562                                        | (30)   | 127,215                                       | (38.9) | 204,254                                            | (57.1) |
| <i>Blood pressure &lt;140/90mmHg</i> | 730,392                                                        | (59.7) | -                                                | (0)    | -                                             | (0)    | -                                             | (0)    | 108,434                                            | (30.3) |
| <i>Blood pressure ≥140/90mmHg</i>    | 268,813                                                        | (22)   | 268,813                                          | (55.8) | 81,562                                        | (30)   | 127,215                                       | (38.9) | 95,820                                             | (26.8) |



**Appendix Table 4. Demographic and risk factor characteristics of patients who are eligible for treatment under NICE guidelines 2011, and who lost and did not lose their treatment eligibility when a risk-based strategy was applied.**

|                                                 | Lost eligibility |             | Did not lose eligibility |             |
|-------------------------------------------------|------------------|-------------|--------------------------|-------------|
| <b>N</b>                                        | 81,358           | (29.9)      | 190,605                  | (70.1)      |
| <b>Time in follow-up in years, median (IQR)</b> | 4.4              | (2.6-5.2)   | 3.9                      | (2.3-5.2)   |
| <b>Gender, n (%)</b>                            |                  |             |                          |             |
| Male                                            | 28,901           | (35.5)      | 106,057                  | (55.6)      |
| Female                                          | 52,457           | (64.5)      | 84,548                   | (44.4)      |
| <b>Age group at entry</b>                       |                  |             |                          |             |
| 30-39                                           | 8,769            | (10.8)      | 501                      | (0.3)       |
| 40-49                                           | 26,091           | (32.1)      | 5,532                    | (2.9)       |
| 50-59                                           | 32,006           | (39.3)      | 26,140                   | (13.7)      |
| 60-69                                           | 14,472           | (17.8)      | 73,496                   | (38.6)      |
| 70-79                                           | 20               | (0)         | 84,936                   | (44.6)      |
| <b>Ethnicity, n (%)</b>                         |                  |             |                          |             |
| White or NS                                     | 61,797           | (76)        | 156,374                  | (82)        |
| Indian                                          | 649              | (0.8)       | 1,888                    | (1)         |
| Pakistani                                       | 162              | (0.2)       | 605                      | (0.3)       |
| Bangladeshi                                     | 67               | (0.1)       | 184                      | (0.1)       |
| Other Asian                                     | 477              | (0.6)       | 908                      | (0.5)       |
| Black Caribbean                                 | 682              | (0.8)       | 848                      | (0.4)       |
| Black African                                   | 1,138            | (1.4)       | 440                      | (0.2)       |
| Chinese                                         | 161              | (0.2)       | 129                      | (0.1)       |
| Other ethnic group                              | 16,225           | (19.9)      | 29,229                   | (15.3)      |
| <b>QRISK2 score</b>                             |                  |             |                          |             |
| <10%                                            | 81,358           | (100)       | -                        | (0)         |
| 10-19%                                          | -                | (0)         | 81,112                   | (42.6)      |
| 20-29%                                          | -                | (0)         | 71,019                   | (37.3)      |
| >=30%                                           | -                | (0)         | 38,474                   | (20.2)      |
| <b>Townsend quintile</b>                        |                  |             |                          |             |
| 1                                               | 20,455           | (25.1)      | 40,766                   | (21.4)      |
| 2                                               | 13,676           | (16.8)      | 31,311                   | (16.4)      |
| 3                                               | 16,251           | (20)        | 35,740                   | (18.8)      |
| 4                                               | 16,490           | (20.3)      | 48,125                   | (25.2)      |
| 5                                               | 14,486           | (17.8)      | 34,663                   | (18.2)      |
| <b>Family history cardiovascular disease</b>    | 5,458            | (6.7)       | 16,319                   | (8.6)       |
| <b>Diabetes</b>                                 | 17382            | (21.4)      | 59515                    | (31.2)      |
| <b>Smoking status</b>                           |                  |             |                          |             |
| Non smoker                                      | 53,171           | (65.4)      | 92,313                   | (48.4)      |
| Ex smoker                                       | 17,378           | (21.4)      | 64,944                   | (34.1)      |
| Light smoker                                    | 433              | (0.5)       | 1,120                    | (0.6)       |
| Moderate smoker                                 | 9,868            | (12.1)      | 31,223                   | (16.4)      |
| Heavy smoker                                    | 177              | (0.2)       | 672                      | (0.4)       |
| Missing                                         | 331              | (0.4)       | 333                      | (0.2)       |
| <b>BMI, median (IQR)</b>                        | 29               | (25.7-33.5) | 28.4                     | (25.5-32.3) |
| Missing                                         | 6,405            | (7.9)       | 11,922                   | (6.3)       |
| <b>Total: HDL cholesterol ratio, mean SD</b>    | 3.8              | (1.1)       | 3.9                      | (1.2)       |
| Missing                                         | 35,533           | (43.7)      | 63,623                   | (33.4)      |
| <b>Systolic blood pressure</b>                  |                  |             |                          |             |
| <110                                            | 829              | (1)         | 1,519                    | (0.8)       |
| 110-119                                         | 3,686            | (4.5)       | 6,243                    | (3.3)       |
| 120-139                                         | 29,550           | (36.3)      | 62,636                   | (32.9)      |
| 140-159                                         | 31,973           | (39.3)      | 93,373                   | (49)        |
| 160-179                                         | 13,679           | (16.8)      | 21,939                   | (11.5)      |
| ≥180                                            | 1,641            | (2)         | 4,895                    | (2.6)       |
| <b>Systolic blood pressure</b>                  | 142              | (16.2)      | 143                      | (15.3)      |
| <b>Diastolic blood pressure</b>                 | 87               | (10.9)      | 81                       | (10)        |
| <b>Using blood pressure lowering medication</b> | 49,963           | (61.4)      | 140,438                  | (73.7)      |
| <b>Using statins</b>                            | 11,952           | (14.7)      | 71,856                   | (37.7)      |
| <b>Rheumatoid arthritis</b>                     | 707              | (0.9)       | 3,753                    | (2)         |
| <b>Atrial fibrillation</b>                      | 59               | (0.1)       | 8,068                    | (4.2)       |
| <b>Renal disease</b>                            | 6,373            | (7.8)       | 29,872                   | (15.7)      |
| <b>Proteinuria</b>                              | 1,697            | (2.1)       | 3,884                    | (2)         |
| <b>Hypertensive retinopathy</b>                 | 132              | (0.2)       | 351                      | (0.2)       |
| <b>Cardiovascular disease during follow-up</b>  | 2,038            | (2.5)       | 13,098                   | (6.9)       |

**Appendix Table 5. Number of patients eligible for blood pressure lowering treatment under each strategy, predicted events over five years, number of events that would be avoided with treatment for five years, number treated for five years per event avoided, additional patients who are eligible compared to NICE guidelines 2011, and additional events avoided compared to NICE guidelines 2011.**

|                                                   | Estimated eligibility in UK population aged 30-79, n(%) |        | N predicted outcomes among eligible patients over 5 years if all patients were untreated* | N events that could be avoided with treatment of all eligible patients** | Number of patients needed to treat for five years to avoid one event | Additional N (%) patients eligible compared to NICE 2011 |        | Additional N (%) events avoided compared to NICE 2011 |        |
|---------------------------------------------------|---------------------------------------------------------|--------|-------------------------------------------------------------------------------------------|--------------------------------------------------------------------------|----------------------------------------------------------------------|----------------------------------------------------------|--------|-------------------------------------------------------|--------|
| <b>Blood pressure <math>\geq</math>140/90mmHg</b> | 11,564,616                                              | (39.4) | 753,807                                                                                   | 150761                                                                   | 77                                                                   | 5,037,504                                                | (77.2) | 34,186                                                | (29.3) |
| <b>NICE guidelines 2011</b>                       | 6,527,112                                               | (22.2) | 582,880                                                                                   | 116576                                                                   | 56                                                                   | -                                                        |        | -                                                     |        |
| <b>NICE guidelines 2019</b>                       | 7,858,296                                               | (26.8) | 675,582                                                                                   | 135116                                                                   | 58                                                                   | 1,331,184                                                | (20.4) | 18,540                                                | (15.9) |
| <b>QRISK2 ten year risk <math>\geq</math>10%</b>  | 8,588,160                                               | (29.3) | 807,303                                                                                   | 161461                                                                   | 53                                                                   | 2,061,048                                                | (31.6) | 44,885                                                | (38.5) |

\*Estimated as predicted outcomes in treated and untreated patients, where: untreated patients predicted events = event rate x number of eligible patients x 5; treated patients predicted events: event rate x number of eligible patients x 5 x 1.25 (inflating number of outcomes among treated by 20%)

\*\*20% of predicted outcomes

**Appendix Table 6. Number of patients eligible for blood pressure lowering treatment under each strategy, predicted acute CVD events (myocardial infarction and stroke) over ten years, number of acute CVD events that would be avoided with treatment for ten years, number treated for ten years per event avoided, additional patients who are eligible compared to NICE guidelines 2011, and additional acute CVD events avoided compared to NICE guidelines 2011.**

|                                                   | Estimated eligibility in UK population aged 30-79, n(%) |        | N predicted outcomes among eligible patients over 10 years if all patients were untreated* | N events that could be avoided with treatment of all eligible patients** | Number of patients needed to treat for ten years to avoid one event | Additional N (%) patients eligible compared to NICE 2011 |        | Additional N (%) events avoided compared to NICE 2011 |        |
|---------------------------------------------------|---------------------------------------------------------|--------|--------------------------------------------------------------------------------------------|--------------------------------------------------------------------------|---------------------------------------------------------------------|----------------------------------------------------------|--------|-------------------------------------------------------|--------|
| <b>Blood pressure <math>\geq</math>140/90mmHg</b> | 11,564,616                                              | (39.4) | 777,455                                                                                    | 155491                                                                   | 74                                                                  | 5,037,504                                                | (77.2) | 36,239                                                | (30.4) |
| <b>NICE guidelines 2011</b>                       | 6,527,112                                               | (22.2) | 596,258                                                                                    | 119252                                                                   | 55                                                                  | -                                                        |        | -                                                     |        |
| <b>NICE guidelines 2019</b>                       | 7,858,296                                               | (26.8) | 695,987                                                                                    | 139197                                                                   | 56                                                                  | 1,331,184                                                | (20.4) | 19,946                                                | (16.7) |
| <b>QRISK2 ten year risk <math>\geq</math>10%</b>  | 8,588,160                                               | (29.3) | 848,736                                                                                    | 169747                                                                   | 51                                                                  | 2,061,048                                                | (31.6) | 50,496                                                | (42.3) |

\*Estimated as predicted outcomes in treated and untreated patients, where: untreated patients predicted events = event rate x number of eligible patients x 10; treated patients predicted events: event rate x number of eligible patients x 10 x 1.25 (inflating number of outcomes among treated by 20%)

\*\*20% of predicted outcomes

## Additional Figures

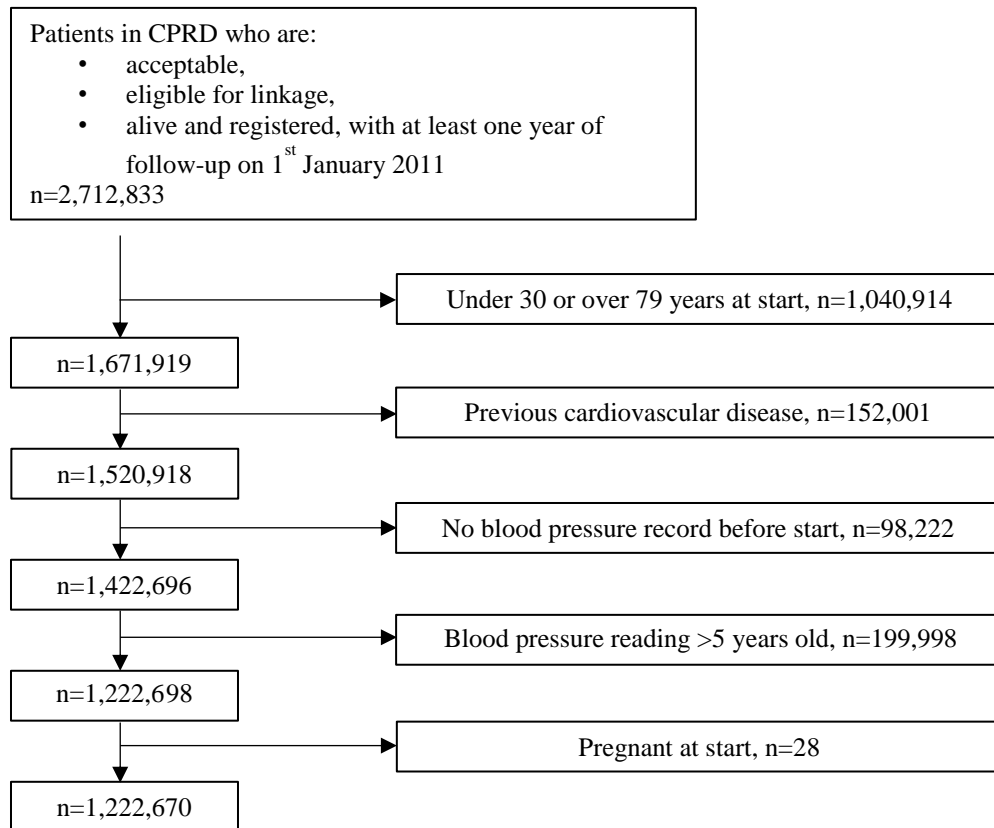

Appendix Figure 1. Cohort selection flowchart

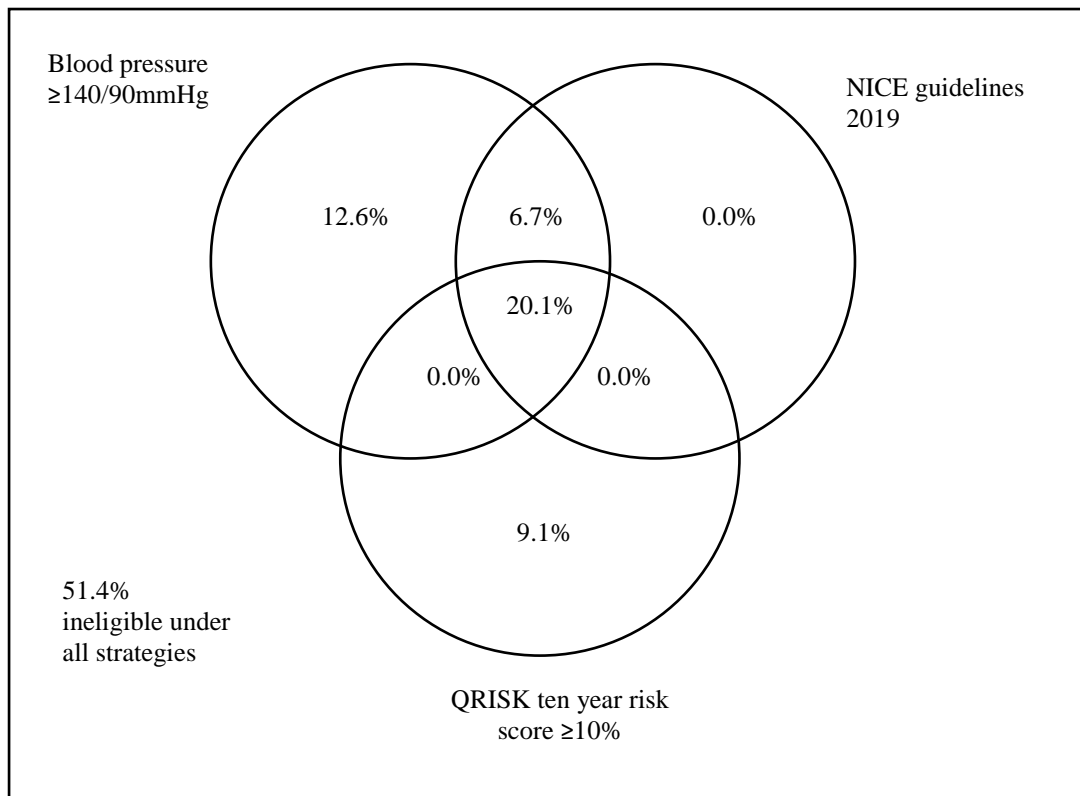

**Appendix Figure 2. Comparison of eligibility for blood pressure lowering treatment based on three strategies (i) blood pressure  $\geq 140/90$ mmHg alone, (ii) NICE guidelines 2011, (iii) QRISK2 10 year cardiovascular disease risk  $\geq 10\%$ )**

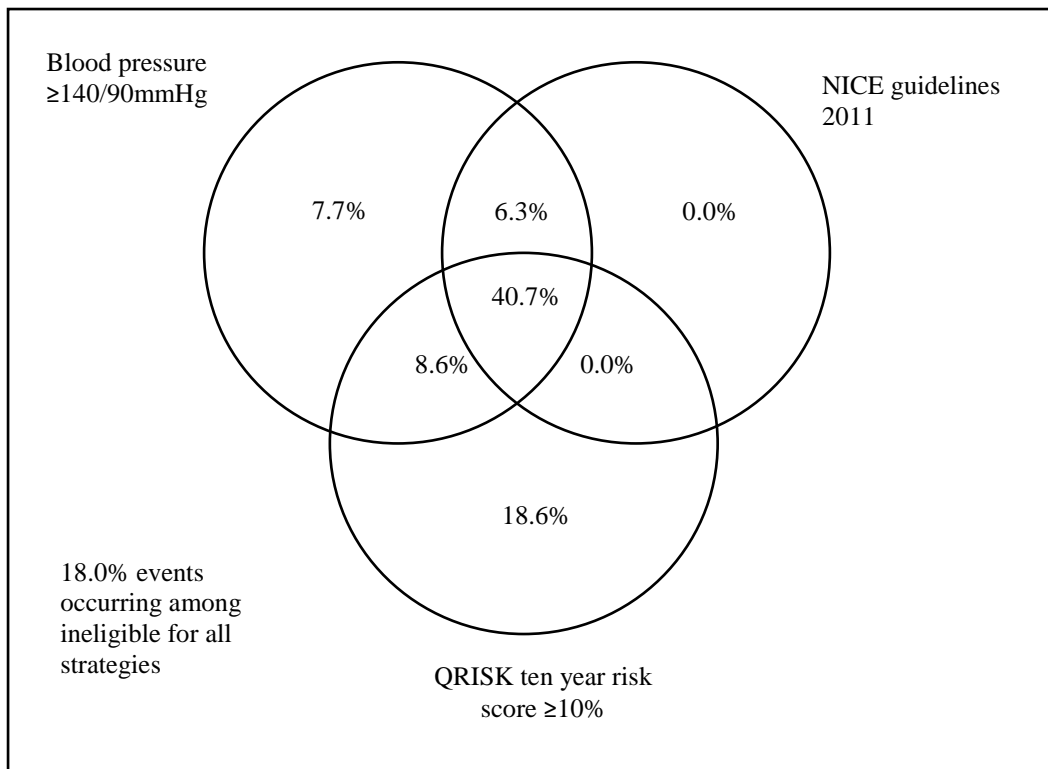

**Appendix Figure 3. Proportion of all cardiovascular disease events (N=32,183) occurring according to baseline eligibility based on three strategies (i) blood pressure  $\geq 140/90$ mmHg alone, (ii) NICE 2011 guidelines, (iii) QRISK2 10 year cardiovascular disease risk  $\geq 10\%$ ). Note: 18.0% of cardiovascular disease events occurred among patients who were not eligible under any strategy.**

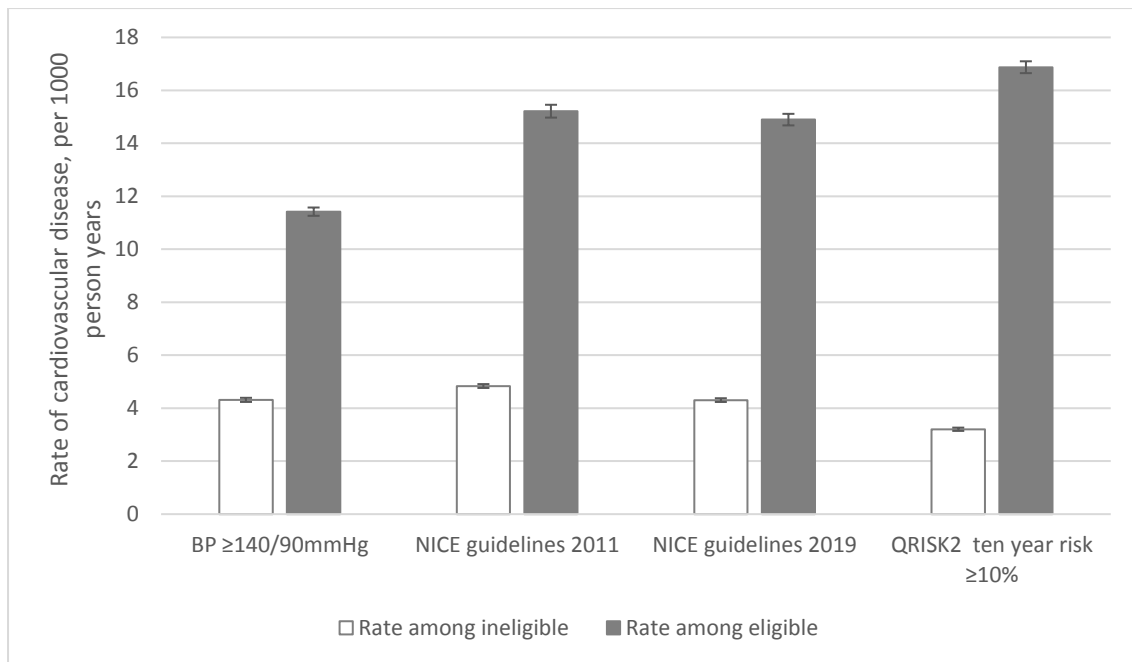

**Appendix Figure 4. Rates of cardiovascular disease per 1000 person years among patients who were classified as eligible and ineligible for blood pressure lowering treatment under each treatment strategy (blood pressure  $\geq$ 140/90mmHg, NICE 2011 guidelines, NICE 2019 guidelines, QRISK2 ten year risk  $\geq$ 10%) with 95% confidence intervals. BP: blood pressure**

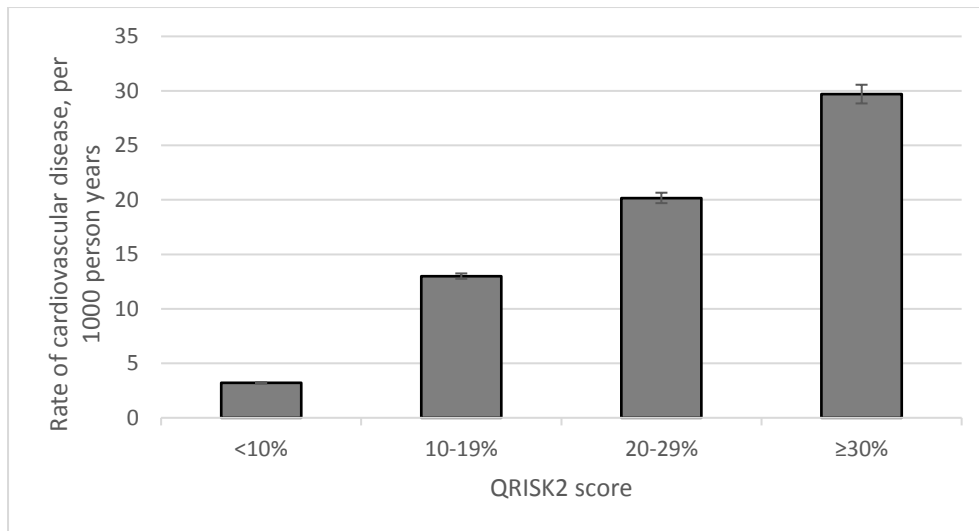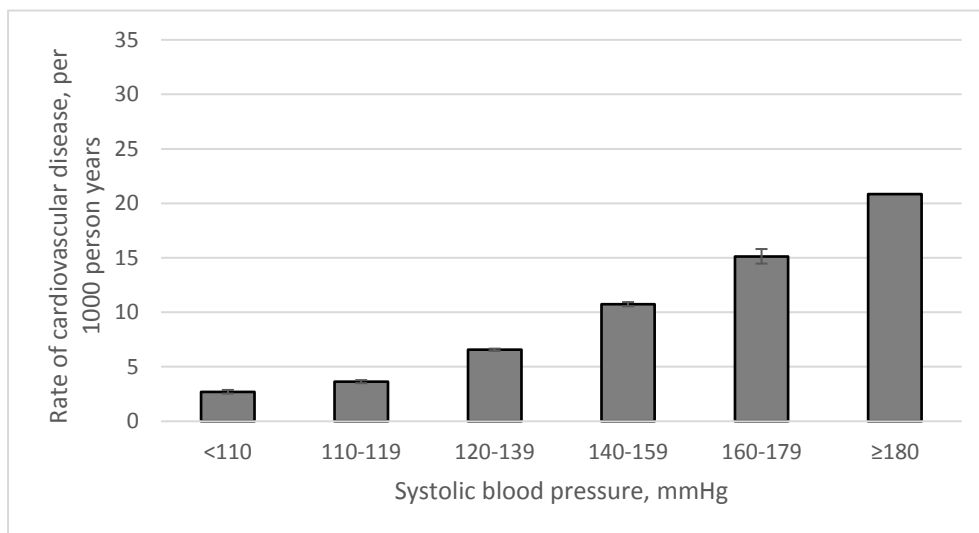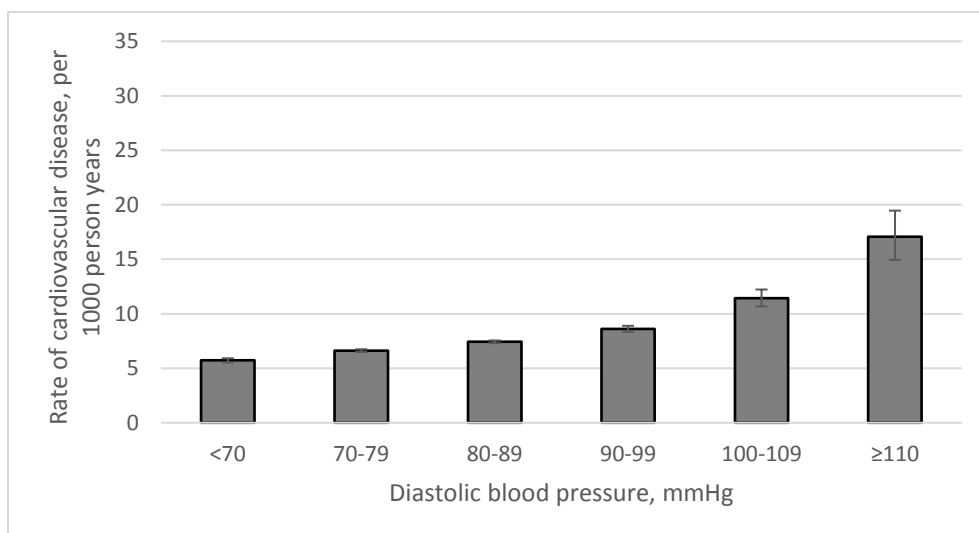

**Appendix Figure 5. Rates of cardiovascular disease per 1000 person years, by groups of QRISK2 ten year risk score, systolic blood pressure and diastolic blood pressure (with 95% confidence intervals).**



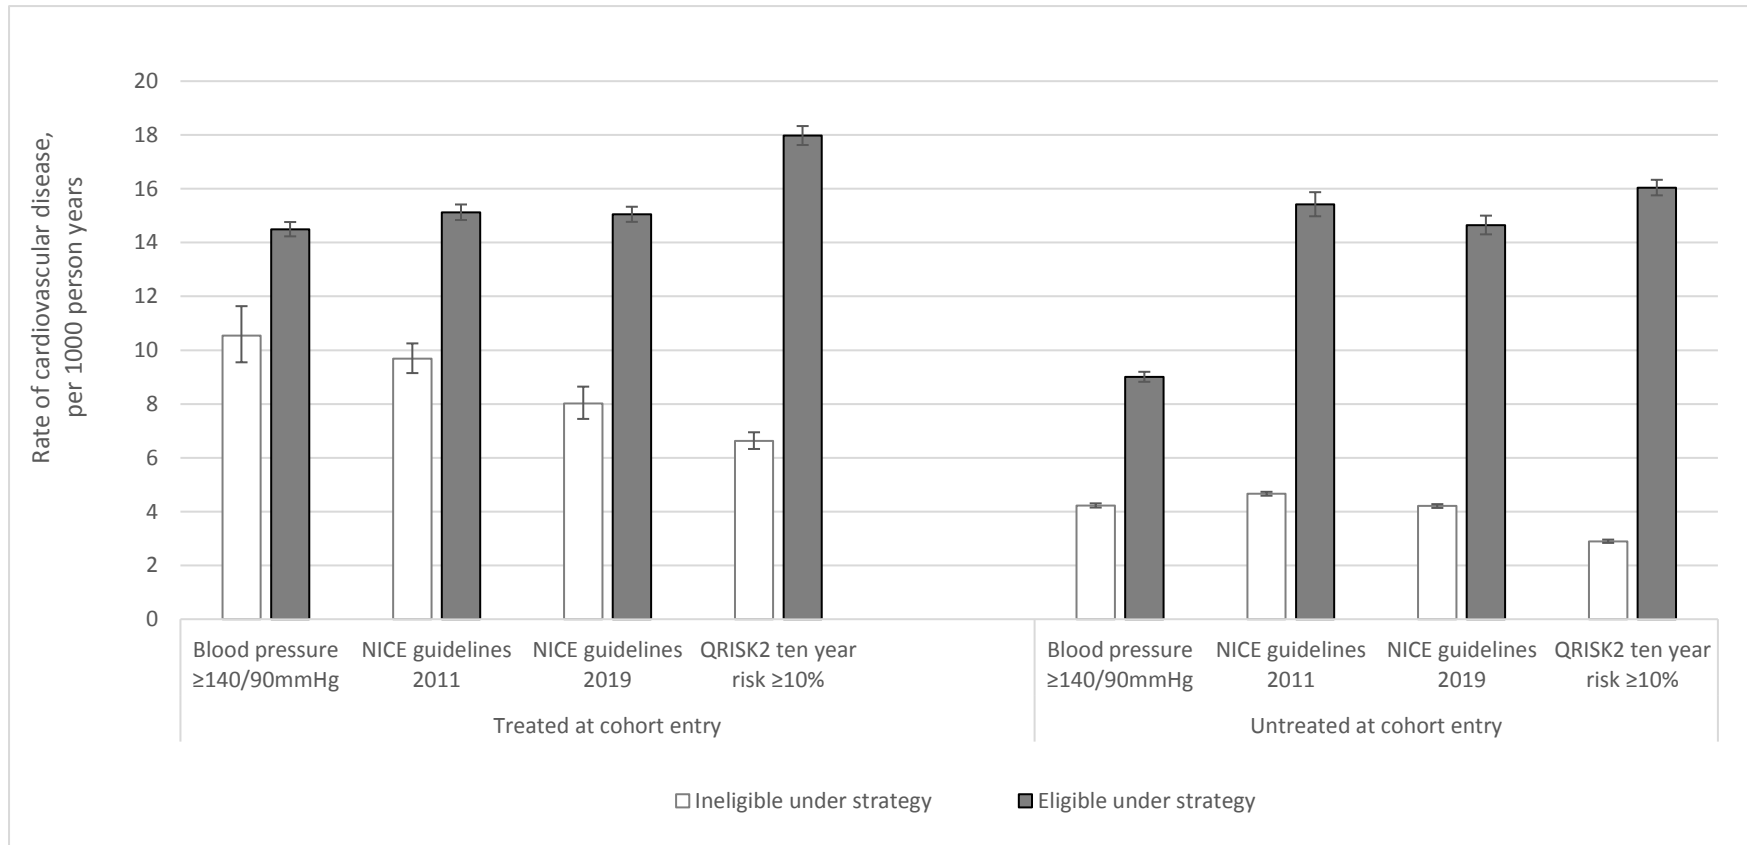

**Appendix Figure 6. Rate of cardiovascular disease per 1000 person years (with 95% confidence intervals) among patients eligible and ineligible for blood pressure lowering treatment under each treatment strategy (blood pressure  $\geq 140/90$ mmHg, NICE 2011 guidelines, NICE 2019 guidelines, QRISK2 ten year risk  $\geq 10\%$ ), stratified by treatment with blood pressure lowering at cohort entry.**

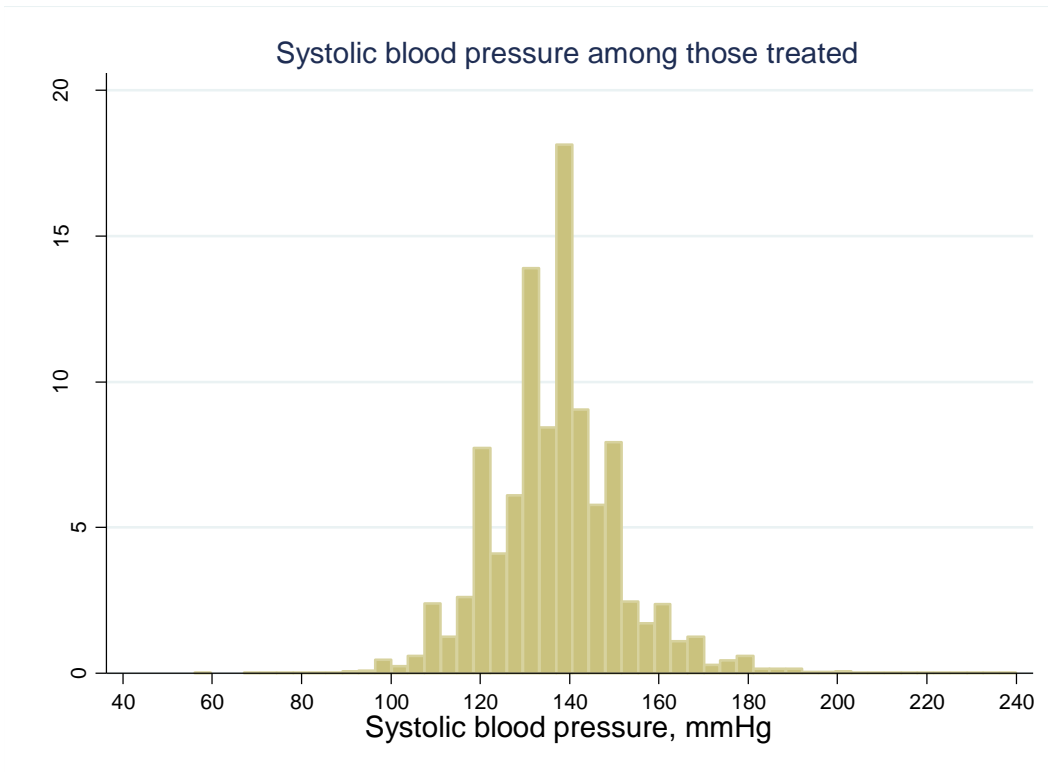

**Appendix Figure 7. Distribution of systolic blood pressures (recorded closest to cohort entry date 1<sup>st</sup> January 2011) among patients who were receiving blood pressure lowering treatment at cohort entry.**

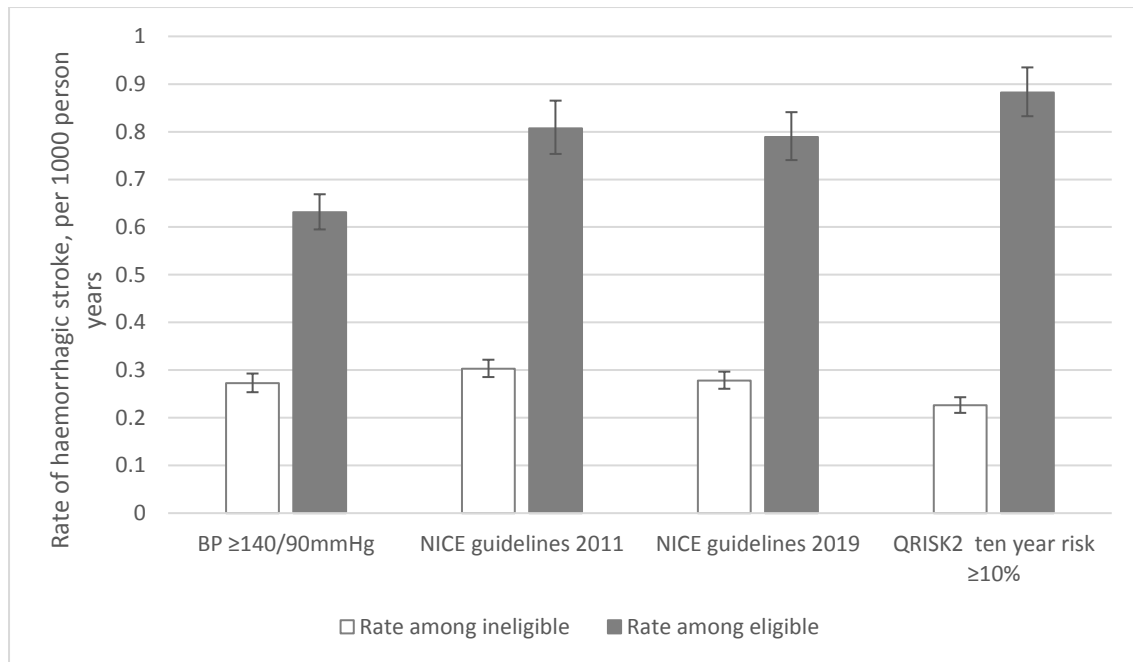

**Appendix Figure 8. Rate of haemorrhagic stroke per 1000 person years among patients who were classified as eligible and ineligible for blood pressure lowering treatment under each treatment strategy (blood pressure  $\geq$ 140/90mmHg, NICE 2011 guidelines, NICE 2019 guidelines, QRISK2 ten year risk  $\geq$ 10%) with 95% confidence intervals. BP: blood pressure**

## Code lists for use with CPRD, HES and ONS data

### Medical code list for cardiovascular disease in CPRD

- any\_chd: any code indicating coronary heart disease; including stable angina, percutaneous coronary intervention, coronary artery bypass graft, myocardial infarction, acute coronary syndrome, unstable angina, heart failure, sudden cardiac death, coronary thrombolysis, coronary heart disease not otherwise specified.
- any\_cvd: any code indicating cerebrovascular disease; including stroke and non-stroke cerebrovascular disease.
- any\_pad: any code indicating peripheral arterial disease; including peripheral arterial disease, abdominal aortic aneurysm, procedures to repair these.
- any\_acs: any code indicating unstable angina, acute coronary syndrome, myocardial infarction, coronary thrombolysis.
- any\_stroke: any code indicating ischaemic, haemorrhagic stroke or stroke not otherwise specified.

| Medcode | Read code | Read terms                                                 | any_chd | any_cvd | any_pad | any_acs | any_stroke |
|---------|-----------|------------------------------------------------------------|---------|---------|---------|---------|------------|
| 6336    | 14A5.00   | H/O: angina pectoris                                       | 1       |         |         |         |            |
| 57062   | 14AJ.00   | H/O: Angina in last year                                   | 1       |         |         |         |            |
| 103655  | 187..00   | Frequency of angina                                        | 1       |         |         |         |            |
| 107967  | 661M000   | Angina self-management plan agreed                         | 1       |         |         |         |            |
| 109391  | 661N000   | Angina self-management plan review                         | 1       |         |         |         |            |
| 13185   | 662K.00   | Angina control                                             | 1       |         |         |         |            |
| 19542   | 662K000   | Angina control - good                                      | 1       |         |         |         |            |
| 15373   | 662K100   | Angina control - poor                                      | 1       |         |         |         |            |
| 14782   | 662K200   | Angina control - improving                                 | 1       |         |         |         |            |
| 108504  | 662K400   | Angina self management plan commenced                      | 1       |         |         |         |            |
| 108506  | 662K500   | Angina self management plan completed                      | 1       |         |         |         |            |
| 15349   | 662Kz00   | Angina control NOS                                         | 1       |         |         |         |            |
| 45960   | 8B27.00   | Antianginal therapy                                        | 1       |         |         |         |            |
| 108056  | 8IEY.00   | Referral to Angina Plan self-management programme declined | 1       |         |         |         |            |
| 107574  | 8T04.00   | Referral to Angina Plan self-management programme          | 1       |         |         |         |            |
| 1430    | G33..00   | Angina pectoris                                            | 1       |         |         |         |            |
| 20095   | G330.00   | Angina decubitus                                           | 1       |         |         |         |            |
| 18125   | G330000   | Nocturnal angina                                           | 1       |         |         |         |            |
| 29902   | G330z00   | Angina decubitus NOS                                       | 1       |         |         |         |            |
| 25842   | G33z.00   | Angina pectoris NOS                                        | 1       |         |         |         |            |
| 54535   | G33z100   | Stenocardia                                                | 1       |         |         |         |            |
| 7696    | G33z200   | Syncope anginosa                                           | 1       |         |         |         |            |

|       |         |                                                             |   |  |  |  |  |
|-------|---------|-------------------------------------------------------------|---|--|--|--|--|
| 1414  | G33z300 | Angina on effort                                            | 1 |  |  |  |  |
| 9555  | G33z500 | Post infarct angina                                         | 1 |  |  |  |  |
| 26863 | G33z600 | New onset angina                                            | 1 |  |  |  |  |
| 12804 | G33z700 | Stable angina                                               | 1 |  |  |  |  |
| 28554 | G33zz00 | Angina pectoris NOS                                         | 1 |  |  |  |  |
| 24540 | G34y000 | Chronic coronary insufficiency                              | 1 |  |  |  |  |
| 39546 | Gyu3000 | [X]Other forms of angina pectoris                           | 1 |  |  |  |  |
| 32450 | G33z400 | Ischaemic chest pain                                        | 1 |  |  |  |  |
| 737   | 792..11 | Coronary artery bypass graft operations                     | 1 |  |  |  |  |
| 3159  | 792Dy00 | Other specified other bypass of coronary artery             | 1 |  |  |  |  |
| 5030  | ZV45K00 | [V]Presence of coronary artery bypass graft                 | 1 |  |  |  |  |
| 5674  | ZV45K11 | [V]Presence of coronary artery bypass graft - CABG          | 1 |  |  |  |  |
| 5744  | 7927500 | Open angioplasty of coronary artery                         | 1 |  |  |  |  |
| 7134  | 7921.11 | Other autograft bypass of coronary artery                   | 1 |  |  |  |  |
| 7137  | 7920y00 | Saphenous vein graft replacement of coronary artery OS      | 1 |  |  |  |  |
| 7442  | 7920200 | Saphenous vein graft replacement of three coronary arteries | 1 |  |  |  |  |
| 7609  | 7921z00 | Other autograft replacement of coronary artery NOS          | 1 |  |  |  |  |
| 7634  | 7920100 | Saphenous vein graft replacement of two coronary arteries   | 1 |  |  |  |  |
| 8312  | 7920.11 | Saphenous vein graft bypass of coronary artery              | 1 |  |  |  |  |
| 8679  | 7920000 | Saphenous vein graft replacement of one coronary artery     | 1 |  |  |  |  |
| 9414  | 7921    | Other autograft replacement of coronary artery              | 1 |  |  |  |  |
| 10209 | 7921200 | Autograft replacement of three coronary arteries NEC        | 1 |  |  |  |  |
| 11610 | 7920300 | Saphenous vein graft replacement of four+ coronary arteries | 1 |  |  |  |  |
| 12734 | SP07600 | Coronary artery bypass graft occlusion                      | 1 |  |  |  |  |
| 18249 | 7920    | Saphenous vein graft replacement of coronary artery         | 1 |  |  |  |  |
| 18913 | ZV45700 | [V]Presence of aortocoronary bypass graft                   | 1 |  |  |  |  |
| 19193 | 7923z00 | Prosthetic replacement of coronary artery NOS               | 1 |  |  |  |  |
| 19402 | 7923    | Prosthetic replacement of coronary artery                   | 1 |  |  |  |  |
| 19413 | 7921100 | Autograft replacement of two coronary arteries NEC          | 1 |  |  |  |  |
| 22647 | 7925311 | LIMA single anastomosis                                     | 1 |  |  |  |  |
| 28837 | 7925.11 | Creation of bypass from mammary artery to coronary artery   | 1 |  |  |  |  |
| 31519 | 7925100 | Double implant of mammary arteries into coronary arteries   | 1 |  |  |  |  |
| 31540 | 7924200 | Revision of bypass for three coronary arteries              | 1 |  |  |  |  |

|       |         |                                                              |   |  |  |  |  |
|-------|---------|--------------------------------------------------------------|---|--|--|--|--|
| 31556 | 7922    | Allograft replacement of coronary artery                     | 1 |  |  |  |  |
| 32651 | 7922.11 | Allograft bypass of coronary artery                          | 1 |  |  |  |  |
| 33461 | 7924    | Revision of bypass for coronary artery                       | 1 |  |  |  |  |
| 33471 | 792Dz00 | Other bypass of coronary artery NOS                          | 1 |  |  |  |  |
| 33718 | 7925000 | Double anastomosis of mammary arteries to coronary arteries  | 1 |  |  |  |  |
| 34963 | 792D.00 | Other bypass of coronary artery                              | 1 |  |  |  |  |
| 36011 | 7923.11 | Prosthetic bypass of coronary artery                         | 1 |  |  |  |  |
| 37682 | 7925    | Connection of mammary artery to coronary artery              | 1 |  |  |  |  |
| 37719 | 7925y00 | Connection of mammary artery to coronary artery OS           | 1 |  |  |  |  |
| 42708 | 7921300 | Autograft replacement of four of more coronary arteries NEC  | 1 |  |  |  |  |
| 44561 | 7921000 | Autograft replacement of one coronary artery NEC             | 1 |  |  |  |  |
| 45370 | 7922300 | Allograft replacement of four or more coronary arteries      | 1 |  |  |  |  |
| 45886 | 7922200 | Allograft replacement of three coronary arteries             | 1 |  |  |  |  |
| 48767 | 7922z00 | Allograft replacement of coronary artery NOS                 | 1 |  |  |  |  |
| 51507 | 7925300 | Single anastomosis of mammary artery to coronary artery NEC  | 1 |  |  |  |  |
| 51515 | 7920z00 | Saphenous vein graft replacement coronary artery NOS         | 1 |  |  |  |  |
| 52938 | 7924000 | Revision of bypass for one coronary artery                   | 1 |  |  |  |  |
| 55092 | 792C000 | Replacement of coronary arteries using multiple methods      | 1 |  |  |  |  |
| 55598 | 792C.00 | Other replacement of coronary artery                         | 1 |  |  |  |  |
| 56990 | 7925z00 | Connection of mammary artery to coronary artery NOS          | 1 |  |  |  |  |
| 57241 | 7922100 | Allograft replacement of two coronary arteries               | 1 |  |  |  |  |
| 57634 | 7924z00 | Revision of bypass for coronary artery NOS                   | 1 |  |  |  |  |
| 59423 | 7922y00 | Other specified allograft replacement of coronary artery     | 1 |  |  |  |  |
| 60753 | 7926300 | Single implantation thoracic artery into coronary artery NEC | 1 |  |  |  |  |
| 61310 | 7921y00 | Other autograft replacement of coronary artery OS            | 1 |  |  |  |  |
| 62608 | 7926000 | Double anastom thoracic arteries to coronary arteries NEC    | 1 |  |  |  |  |
| 66236 | 7923200 | Prosthetic replacement of three coronary arteries            | 1 |  |  |  |  |
| 66664 | 7923100 | Prosthetic replacement of two coronary arteries              | 1 |  |  |  |  |
| 67554 | 7924100 | Revision of bypass for two coronary arteries                 | 1 |  |  |  |  |
| 67591 | 7926200 | Single anastomosis of thoracic artery to coronary artery NEC | 1 |  |  |  |  |
| 67761 | 7923300 | Prosthetic replacement of four or more coronary arteries     | 1 |  |  |  |  |
| 68123 | 7925312 | RIMA single anastomosis                                      | 1 |  |  |  |  |
| 68139 | 7925400 | Single implantation of mammary artery into coronary artery   | 1 |  |  |  |  |

|        |          |                                                              |   |  |  |  |  |
|--------|----------|--------------------------------------------------------------|---|--|--|--|--|
| 69776  | SP00300  | Mechanical complication of coronary bypass                   | 1 |  |  |  |  |
| 70111  | 7922000  | Allograft replacement of one coronary artery                 | 1 |  |  |  |  |
| 70755  | 792Cz00  | Replacement of coronary artery NOS                           | 1 |  |  |  |  |
| 72780  | 7926z00  | Connection of other thoracic artery to coronary artery NOS   | 1 |  |  |  |  |
| 92419  | 7923000  | Prosthetic replacement of one coronary artery                | 1 |  |  |  |  |
| 93828  | 792Cy00  | Other specified replacement of coronary artery               | 1 |  |  |  |  |
| 96804  | 7926     | Connection of other thoracic artery to coronary artery       | 1 |  |  |  |  |
| 97953  | 7924y00  | Other specified revision of bypass for coronary artery       | 1 |  |  |  |  |
| 101569 | 7924300  | Revision of bypass for four or more coronary arteries        | 1 |  |  |  |  |
| 18643  | ZV45800  | [V]Presence of coronary angioplasty implant and graft        | 1 |  |  |  |  |
| 6980   | ZV45L00  | [V]Status following coronary angioplasty NOS                 | 1 |  |  |  |  |
| 2901   | 7928     | Transluminal balloon angioplasty of coronary artery          | 1 |  |  |  |  |
| 5703   | 7928.11  | Percutaneous balloon coronary angioplasty                    | 1 |  |  |  |  |
| 18670  | 7928000  | Percut transluminal balloon angioplasty one coronary artery  | 1 |  |  |  |  |
| 33735  | 7928100  | Percut translum balloon angioplasty mult coronary arteries   | 1 |  |  |  |  |
| 42462  | 7928200  | Percut translum balloon angioplasty bypass graft coronary a  | 1 |  |  |  |  |
| 86071  | 7928300  | Percut translum cutting balloon angioplasty coronary artery  | 1 |  |  |  |  |
| 41547  | 7928y00  | Transluminal balloon angioplasty of coronary artery OS       | 1 |  |  |  |  |
| 732    | 7928z00  | Transluminal balloon angioplasty of coronary artery NOS      | 1 |  |  |  |  |
| 22828  | 7929000  | Percutaneous transluminal laser coronary angioplasty         | 1 |  |  |  |  |
| 19046  | 7929300  | Rotary blade coronary angioplasty                            | 1 |  |  |  |  |
| 8942   | 7929400  | Insertion of coronary artery stent                           | 1 |  |  |  |  |
| 42304  | 7929500  | Insertion of drug-eluting coronary artery stent              | 1 |  |  |  |  |
| 93618  | 7929600  | Percutaneous transluminal atherectomy of coronary artery     | 1 |  |  |  |  |
| 22020  | 792B000  | Endarterectomy of coronary artery NEC                        | 1 |  |  |  |  |
| 105184 | 792E.00  | Percutaneous coronary intervention                           | 1 |  |  |  |  |
| 107406 | 7.92E+02 | Emergency percutaneous coronary intervention                 | 1 |  |  |  |  |
| 43939  | 793G.00  | Perc translumin balloon angioplasty stenting coronary artery | 1 |  |  |  |  |
| 60067  | 793G000  | Perc translum ball angio insert 1-2 drug elut stents cor art | 1 |  |  |  |  |
| 87849  | 793G100  | Perc tran ball angio ins 3 or more drug elut stents cor art  | 1 |  |  |  |  |
| 85947  | 793G200  | Perc translum balloon angioplasty insert 1-2 stents cor art  | 1 |  |  |  |  |
| 92927  | 793G300  | Percutaneous cor balloon angiop 3 more stents cor art NEC    | 1 |  |  |  |  |
| 96537  | 793Gy00  | OS perc translumina balloon angioplast stenting coronary art | 1 |  |  |  |  |

|       |         |                                                             |   |  |  |   |
|-------|---------|-------------------------------------------------------------|---|--|--|---|
| 61208 | 793Gz00 | Perc translum balloon angioplasty stenting coronary art NOS | 1 |  |  |   |
| 733   | 7A54000 | Percutaneous transluminal angioplasty of artery NEC         | 1 |  |  |   |
| 38813 | 7A54500 | Rotary blade angioplasty                                    | 1 |  |  |   |
| 70185 | 7A54800 | Percutaneous transluminal atherectomy                       | 1 |  |  |   |
| 86773 | 7A56400 | Percutaneous transluminal balloon angioplasty of artery     | 1 |  |  |   |
| 20903 | 7A6G100 | Peroperative angioplasty                                    | 1 |  |  |   |
| 64923 | 7A6H300 | Prosthetic graft patch angioplasty                          | 1 |  |  |   |
| 66921 | 7A6H400 | Percutaneous transluminal angioplasty of vascular graft     | 1 |  |  |   |
| 8246  | 322..00 | ECG: myocardial ischaemia                                   | 1 |  |  |   |
| 26973 | 3222    | ECG:shows myocardial ischaemia                              | 1 |  |  |   |
| 35287 | 322Z.00 | ECG: myocardial ischaemia NOS                               | 1 |  |  |   |
| 42104 | 32E4.00 | ECG: S-T depression                                         | 1 |  |  |   |
| 26965 | 32F2.00 | ECG: T wave abnormal                                        | 1 |  |  |   |
| 46230 | 32F3.00 | ECG: T wave flattened                                       | 1 |  |  |   |
| 26967 | 32F4.00 | ECG: T wave inverted                                        | 1 |  |  |   |
| 26966 | 32E3.00 | ECG: S-T elevation                                          | 1 |  |  | 1 |
| 7783  | 323..00 | ECG: myocardial infarction                                  | 1 |  |  | 1 |
| 39904 | 3232    | ECG: old myocardial infarction                              | 1 |  |  | 1 |
| 26975 | 3233    | ECG: antero-septal infarct.                                 | 1 |  |  | 1 |
| 26972 | 3234    | ECG:posterior/inferior infarct                              | 1 |  |  | 1 |
| 55401 | 3235    | ECG: subendocardial infarct                                 | 1 |  |  | 1 |
| 52705 | 3236    | ECG: lateral infarction                                     | 1 |  |  | 1 |
| 59032 | 323Z.00 | ECG: myocardial infarct NOS                                 | 1 |  |  | 1 |
| 46227 | 32B2.00 | ECG: Q wave abnormal                                        | 1 |  |  | 1 |
| 62270 | 32B3.00 | ECG: Q wave pathological                                    | 1 |  |  | 1 |
| 1628  | 3213100 | Exercise ECG abnormal                                       | 1 |  |  |   |
| 19827 | 3213111 | Positive exercise ECG test                                  | 1 |  |  |   |
| 5233  | 33B9500 | Exercise tolerance test abnormal                            | 1 |  |  |   |
| 58135 | 5C11.00 | Radionuclide heart study abnormal                           | 1 |  |  |   |
| 1021  | 5543    | Coronary arteriograph.abnormal                              | 1 |  |  |   |
| 35382 | 5533    | Angiocardiography abnormal                                  | 1 |  |  |   |
| 3999  | G340000 | Single coronary vessel disease                              | 1 |  |  |   |
| 5254  | G340100 | Double coronary vessel disease                              | 1 |  |  |   |



|        |         |                                                              |   |  |  |   |  |
|--------|---------|--------------------------------------------------------------|---|--|--|---|--|
| 1655   | G340.11 | Triple vessel disease of the heart                           | 1 |  |  |   |  |
| 16993  | I4AE.00 | H/O: aortic aneurysm                                         |   |  |  | 1 |  |
| 1735   | G71..00 | Aortic aneurysm                                              |   |  |  | 1 |  |
| 17767  | G713.00 | Abdominal aortic aneurysm which has ruptured                 |   |  |  | 1 |  |
| 13572  | G713.11 | Ruptured abdominal aortic aneurysm                           |   |  |  | 1 |  |
| 63920  | G713000 | Ruptured suprarenal aortic aneurysm                          |   |  |  | 1 |  |
| 1867   | G714.00 | Abdominal aortic aneurysm without mention of rupture         |   |  |  | 1 |  |
| 17345  | G714.11 | AAA - Abdominal aortic aneurysm without mention of rupture   |   |  |  | 1 |  |
| 45521  | G714000 | Juxtarenal aortic aneurysm                                   |   |  |  | 1 |  |
| 101379 | G714200 | Infrarenal abdominal aortic aneurysm                         |   |  |  | 1 |  |
| 101195 | G714300 | Aneurysm of suprarenal aorta                                 |   |  |  | 1 |  |
| 15304  | G715.00 | Ruptured aortic aneurysm NOS                                 |   |  |  | 1 |  |
| 11430  | G715000 | Thoracoabdominal aortic aneurysm, ruptured                   |   |  |  | 1 |  |
| 16034  | G716.00 | Aortic aneurysm without mention of rupture NOS               |   |  |  | 1 |  |
| 40787  | G716000 | Thoracoabdominal aortic aneurysm, without mention of rupture |   |  |  | 1 |  |
| 9759   | G718.00 | Leaking abdominal aortic aneurysm                            |   |  |  | 1 |  |
| 6872   | G71z.00 | Aortic aneurysm NOS                                          |   |  |  | 1 |  |
| 102725 | Gyu7100 | [X]Aortic aneurysm of unspecified site, ruptured             |   |  |  | 1 |  |
| 102719 | Gyu7200 | [X]Aortic aneurysm of unspecified site, nonruptured          |   |  |  | 1 |  |
| 105621 | Gyu7800 | [X]Aneurysm of aorta in diseases classified elsewhere        |   |  |  | 1 |  |
| 17328  | 7A1..00 | Aorta operations                                             |   |  |  | 1 |  |
| 66914  | 7A10.00 | Extraanatomic bypass of aorta                                |   |  |  | 1 |  |
| 102684 | 7A10400 | Bypass aorta anastomosis axillary artery bi femoral arteries |   |  |  | 1 |  |
| 67839  | 7A10y00 | Other specified extraanatomic bypass of aorta                |   |  |  | 1 |  |
| 100712 | 7A10z00 | Extraanatomic bypass of aorta NOS                            |   |  |  | 1 |  |
| 98082  | 7A15300 | Emerg bypass infrarenal aorta by anastom aorta to aorta NEC  |   |  |  | 1 |  |
| 101835 | 7A15y00 | Other specified other emergency bypass of segment of aorta   |   |  |  | 1 |  |
| 104815 | 7A15z00 | Other emergency bypass of segment of aorta NOS               |   |  |  | 1 |  |
| 37639  | 7A16.00 | Other bypass of segment of aorta                             |   |  |  | 1 |  |
| 61978  | 7A16300 | Bypass of infrarenal aorta by anastomosis aorta to aorta NEC |   |  |  | 1 |  |
| 5597   | 7A16400 | Bypass of abdominal aorta by anastomosis aorta to aorta NEC  |   |  |  | 1 |  |
| 59518  | 7A16y00 | Other specified other bypass of segment of aorta             |   |  |  | 1 |  |
| 42751  | 7A16z00 | Other bypass of segment of aorta NOS                         |   |  |  | 1 |  |

|        |         |                                                              |  |  |  |   |  |  |
|--------|---------|--------------------------------------------------------------|--|--|--|---|--|--|
| 98211  | 7A17.00 | Attention to prosthesis of aorta                             |  |  |  | 1 |  |  |
| 66316  | 7A17100 | Revision of prosthesis of bifurcation of aorta               |  |  |  | 1 |  |  |
| 65813  | 7A17200 | Revision of prosthesis of abdominal aorta NEC                |  |  |  | 1 |  |  |
| 95721  | 7A17300 | Removal of prosthesis from aorta                             |  |  |  | 1 |  |  |
| 107284 | 7A17y00 | Other specified attention to prosthesis of aorta             |  |  |  | 1 |  |  |
| 97596  | 7A17z00 | Attention to prosthesis of aorta NOS                         |  |  |  | 1 |  |  |
| 24371  | 7A18.00 | Plastic repair of aorta                                      |  |  |  | 1 |  |  |
| 39962  | 7A18000 | Plastic repair of aorta and end to end anastomosis of aorta  |  |  |  | 1 |  |  |
| 49878  | 7A18100 | Plastic repair of aorta using subclavian flap                |  |  |  | 1 |  |  |
| 55319  | 7A18200 | Plastic repair of aorta using patch graft                    |  |  |  | 1 |  |  |
| 105136 | 7A18400 | Revision of plastic repair of aorta                          |  |  |  | 1 |  |  |
| 52497  | 7A18y00 | Other specified plastic repair of aorta                      |  |  |  | 1 |  |  |
| 20078  | 7A18z00 | Plastic repair of aorta NOS                                  |  |  |  | 1 |  |  |
| 53163  | 7A19.00 | Other open operations on aorta                               |  |  |  | 1 |  |  |
| 43179  | 7A19000 | Endarterectomy of aorta and patch repair of aorta            |  |  |  | 1 |  |  |
| 36008  | 7A19100 | Endarterectomy of aorta NEC                                  |  |  |  | 1 |  |  |
| 86053  | 7A19y00 | Other specified other open operation on aorta                |  |  |  | 1 |  |  |
| 36928  | 7A19z00 | Other open operation on aorta NOS                            |  |  |  | 1 |  |  |
| 57141  | 7A1A.00 | Transluminal operations on aorta                             |  |  |  | 1 |  |  |
| 57539  | 7A1A.11 | Percutaneous transluminal operations on aorta                |  |  |  | 1 |  |  |
| 30296  | 7A1A000 | Percutaneous transluminal balloon angioplasty of aorta       |  |  |  | 1 |  |  |
| 30466  | 7A1A100 | Percutaneous transluminal angioplasty of aorta NEC           |  |  |  | 1 |  |  |
| 50122  | 7A1A200 | Percutaneous transluminal embolectomy of aortic bifurcation  |  |  |  | 1 |  |  |
| 89198  | 7A1A500 | Percutaneous transluminal balloon angioplasty stenting aorta |  |  |  | 1 |  |  |
| 86810  | 7A1A600 | Percutan transluminal aortic stent graft fenestration NEC    |  |  |  | 1 |  |  |
| 87370  | 7A1A700 | Percutaneous transluminal aortic stent graft branches NEC    |  |  |  | 1 |  |  |
| 96912  | 7A1A800 | Transluminal aortic stent graft with fenestration NEC        |  |  |  | 1 |  |  |
| 89731  | 7A1AA00 | Percutaneous transluminal insertion of stent into aorta      |  |  |  | 1 |  |  |
| 53891  | 7A1Ay00 | Other specified transluminal operation on aorta              |  |  |  | 1 |  |  |
| 48768  | 7A1Az00 | Transluminal operation on aorta NOS                          |  |  |  | 1 |  |  |
| 99787  | 7A1BB00 | Endovascular ins stent for aortic dissection in any position |  |  |  | 1 |  |  |
| 35023  | 7A1y.00 | Other specified operations on aorta                          |  |  |  | 1 |  |  |
| 25735  | 7A1z.00 | Aorta operations NOS                                         |  |  |  | 1 |  |  |

|        |         |                                                              |  |  |  |   |  |  |
|--------|---------|--------------------------------------------------------------|--|--|--|---|--|--|
| 42142  | 7A3..00 | Branches of abdominal aorta operations                       |  |  |  | 1 |  |  |
| 101017 | 7A3y.00 | Other specified operations on branches of abdominal aorta    |  |  |  | 1 |  |  |
| 38546  | 7A1..11 | Dacron graft operations on aorta                             |  |  |  | 1 |  |  |
| 52358  | 7A11.00 | Replacement of aneurysmal bifurcation of aorta               |  |  |  | 1 |  |  |
| 96654  | 7A11000 | Emerg repl aneurysm bifurc aorta by anast aorta to fem art   |  |  |  | 1 |  |  |
| 56495  | 7A11100 | Replace aneurysm bifurc aorta by anast aorta to femoral art  |  |  |  | 1 |  |  |
| 69922  | 7A11200 | Emerg repl aneurysm bifurc aorta by anast aorta to iliac a   |  |  |  | 1 |  |  |
| 92925  | 7A11211 | Y graft of abdominal Aortic aneurysm (emergency)             |  |  |  | 1 |  |  |
| 56510  | 7A11300 | Replace aneurysm bifurc aorta by anast aorta to iliac artery |  |  |  | 1 |  |  |
| 51166  | 7A11311 | Y graft abdominal Aortic aneurysm                            |  |  |  | 1 |  |  |
| 62301  | 7A11y00 | Replacement of aneurysmal bifurcation of aorta OS            |  |  |  | 1 |  |  |
| 66761  | 7A11z00 | Replacement of aneurysmal bifurcation of aorta NOS           |  |  |  | 1 |  |  |
| 31613  | 7A13.00 | Emergency replacement of aneurysmal segment of aorta         |  |  |  | 1 |  |  |
| 17220  | 7A13.11 | Emergency repair of aortic aneurysm                          |  |  |  | 1 |  |  |
| 99722  | 7A13000 | Emerg replace aneurysm asc aorta by anastom aorta to aorta   |  |  |  | 1 |  |  |
| 66232  | 7A13300 | Emerg replace aneurysm infrarenal aorta by anast aorta/aorta |  |  |  | 1 |  |  |
| 54192  | 7A13400 | Emerg replace aneurysm abdom aorta by anast aorta/aorta NEC  |  |  |  | 1 |  |  |
| 63408  | 7A13411 | Tube graft abdominal Aortic aneurysm (emergency)             |  |  |  | 1 |  |  |
| 45477  | 7A13y00 | Emergency replacement of aneurysmal segment of aorta OS      |  |  |  | 1 |  |  |
| 45474  | 7A13z00 | Emergency replacement of aneurysmal segment of aorta NOS     |  |  |  | 1 |  |  |
| 43108  | 7A14.00 | Other replacement of aneurysmal segment of aorta             |  |  |  | 1 |  |  |
| 1736   | 7A14.11 | Aortic aneurysm repair                                       |  |  |  | 1 |  |  |
| 54379  | 7A14200 | Replace aneurys suprarenal aorta by anast aorta to aorta NEC |  |  |  | 1 |  |  |
| 44553  | 7A14300 | Replace aneurys infrarenal aorta by anast aorta to aorta NEC |  |  |  | 1 |  |  |
| 19996  | 7A14400 | Replace aneurysm abdominal aorta by anast aorta to aorta NEC |  |  |  | 1 |  |  |
| 26232  | 7A14411 | Tube graft of Abdominal aortic aneurysm                      |  |  |  | 1 |  |  |
| 55445  | 7A14y00 | Other replacement of aneurysmal segment of aorta OS          |  |  |  | 1 |  |  |
| 36651  | 7A14z00 | Other replacement of aneurysmal segment of aorta NOS         |  |  |  | 1 |  |  |
| 31822  | 7A15.00 | Other emergency bypass of segment of aorta                   |  |  |  | 1 |  |  |
| 102031 | 7A15400 | Emerg bypass abdominal aorta by anastom aorta to aorta NEC   |  |  |  | 1 |  |  |
| 33430  | 7A19400 | Operation on aneurysm of aorta NEC                           |  |  |  | 1 |  |  |
| 93959  | 7A1B.00 | Transluminal operations on aneurysmal segment of aorta       |  |  |  | 1 |  |  |
| 70446  | 7A1B000 | Endovascular stenting infrarenal abdominal aortic aneurysm   |  |  |  | 1 |  |  |

|        |         |                                                              |   |   |   |   |   |
|--------|---------|--------------------------------------------------------------|---|---|---|---|---|
| 97030  | 7A1B100 | Endovascular stenting of suprarenal aortic aneurysm          |   |   | 1 |   |   |
| 90549  | 7A1B400 | Endovascular stenting of aortic bifurcation NEC              |   |   | 1 |   |   |
| 95976  | 7A1B500 | Endovascular stenting of aorto-uniiliac aneurysm             |   |   | 1 |   |   |
| 100195 | 7A1B600 | Endovascular stenting for aortic aneurysm of bifurcation NEC |   |   | 1 |   |   |
| 97109  | 7A1B700 | Endovascular stenting for aorto-uniiliac aneurysm            |   |   | 1 |   |   |
| 97217  | 7A1B800 | Endovascul insert stent infrarenal abdominal aortic aneurysm |   |   | 1 |   |   |
| 106780 | 7A1B900 | Endovascular insertion stent for suprarenal aortic aneurysm  |   |   | 1 |   |   |
| 99859  | 7A1BC00 | Endovas insert stent for aortic aneurysm of bifurcation NEC  |   |   | 1 |   |   |
| 98175  | 7A1BD00 | Endovascular insertion of stent for aorto-uniiliac aneurysm  |   |   | 1 |   |   |
| 90861  | 7A1Bz00 | Transluminal operations on aneurysmal segment of aorta NOS   |   |   | 1 |   |   |
| 94331  | 7A1C.00 | Translum insert stent graft for aneurysmal segment of aorta  |   |   | 1 |   |   |
| 83577  | 7A1C000 | Endovas ins stent graft for infrarenal abdom aortic aneurysm |   |   | 1 |   |   |
| 94682  | 7A1C100 | Endovas insert of stent graft for suprarenal aortic aneurysm |   |   | 1 |   |   |
| 94069  | 7A1C400 | Endovas insertion of stent graft for aortic bifurcation NEC  |   |   | 1 |   |   |
| 103427 | 7A1C500 | Endovas insertion of stent graft for aorto-uniiliac aneurysm |   |   | 1 |   |   |
| 98565  | 7A1Cy00 | OS translum ins stent graft for aneurysmal segment of aorta  |   |   | 1 |   |   |
| 93627  | 7A1Cz00 | Translum ins stent graft for aneurysmal segment of aorta NOS |   |   | 1 |   |   |
| 105216 | 14AW.00 | H/O acute coronary syndrome                                  | 1 |   |   | 1 |   |
| 11983  | G311500 | Acute coronary syndrome                                      | 1 |   |   | 1 |   |
| 5221   | 44H3.00 | Cardiac enzymes abnormal                                     | 1 |   |   | 1 |   |
| 60664  | 44H3000 | Cardiac enzymes abnormal - first set                         | 1 |   |   | 1 |   |
| 28914  | 662o.00 | Haemorrhagic stroke monitoring                               |   | 1 |   |   | 1 |
| 48149  | G681.00 | Sequelae of intracerebral haemorrhage                        |   | 1 |   |   | 1 |
| 43451  | G682.00 | Sequelae of other nontraumatic intracranial haemorrhage      |   | 1 |   |   | 1 |
| 5051   | G61..00 | Intracerebral haemorrhage                                    |   | 1 |   |   | 1 |
| 6960   | G61..11 | CVA - cerebrovascular accid due to intracerebral haemorrhage |   | 1 |   |   | 1 |
| 18604  | G61..12 | Stroke due to intracerebral haemorrhage                      |   | 1 |   |   | 1 |
| 31595  | G610.00 | Cortical haemorrhage                                         |   | 1 |   |   | 1 |
| 40338  | G611.00 | Internal capsule haemorrhage                                 |   | 1 |   |   | 1 |
| 46316  | G612.00 | Basal nucleus haemorrhage                                    |   | 1 |   |   | 1 |
| 13564  | G613.00 | Cerebellar haemorrhage                                       |   | 1 |   |   | 1 |
| 7912   | G614.00 | Pontine haemorrhage                                          |   | 1 |   |   | 1 |
| 30045  | G616.00 | External capsule haemorrhage                                 |   | 1 |   |   | 1 |

|        |         |                                                              |  |   |  |   |
|--------|---------|--------------------------------------------------------------|--|---|--|---|
| 30202  | G617.00 | Intracerebral haemorrhage, intraventricular                  |  | 1 |  | 1 |
| 57315  | G618.00 | Intracerebral haemorrhage, multiple localized                |  | 1 |  | 1 |
| 107440 | G619.00 | Lobar cerebral haemorrhage                                   |  | 1 |  | 1 |
| 31060  | G61X.00 | Intracerebral haemorrhage in hemisphere, unspecified         |  | 1 |  | 1 |
| 28314  | G61X000 | Left sided intracerebral haemorrhage, unspecified            |  | 1 |  | 1 |
| 19201  | G61X100 | Right sided intracerebral haemorrhage, unspecified           |  | 1 |  | 1 |
| 3535   | G61z.00 | Intracerebral haemorrhage NOS                                |  | 1 |  | 1 |
| 53810  | Gyu6200 | [X]Other intracerebral haemorrhage                           |  | 1 |  | 1 |
| 96630  | Gyu6F00 | [X]Intracerebral haemorrhage in hemisphere, unspecified      |  | 1 |  | 1 |
| 56007  | G601.00 | Subarachnoid haemorrhage from carotid siphon and bifurcation |  | 1 |  | 1 |
| 19412  | G602.00 | Subarachnoid haemorrhage from middle cerebral artery         |  | 1 |  | 1 |
| 17326  | G60X.00 | Subarachnoid haemorrh from intracranial artery, unspecif     |  | 1 |  | 1 |
| 108668 | Gyu6000 | [X]Subarachnoid haemorrhage from other intracranial arteries |  | 1 |  | 1 |
| 108630 | Gyu6E00 | [X]Subarachnoid haemorrh from intracranial artery, unspecif  |  | 1 |  | 1 |
| 4917   | 7017000 | Evacuation of subdural haematoma                             |  | 1 |  | 1 |
| 4273   | G621.00 | Subdural haemorrhage - nontraumatic                          |  | 1 |  | 1 |
| 17734  | G622.00 | Subdural haematoma - nontraumatic                            |  | 1 |  | 1 |
| 18912  | G623.00 | Subdural haemorrhage NOS                                     |  | 1 |  | 1 |
| 6569   | S62..13 | Subdural haemorrhage following injury                        |  | 1 |  | 1 |
| 2883   | S622.00 | Closed traumatic subdural haemorrhage                        |  | 1 |  | 1 |
| 94351  | S623.00 | Open traumatic subdural haemorrhage                          |  | 1 |  | 1 |
| 8181   | S628.00 | Traumatic subdural haemorrhage                               |  | 1 |  | 1 |
| 7862   | S629.00 | Traumatic subdural haematoma                                 |  | 1 |  | 1 |
| 53980  | S629000 | Traumatic subdural haematoma without open intracranial wound |  | 1 |  | 1 |
| 96677  | S629100 | Traumatic subdural haematoma with open intracranial wound    |  | 1 |  | 1 |
| 4107   | 7032000 | Evacuation of extradural haematoma                           |  | 1 |  | 1 |
| 36178  | G620.00 | Extradural haemorrhage - nontraumatic                        |  | 1 |  | 1 |
| 27661  | S62..11 | Extradural haemorrhage following injury                      |  | 1 |  | 1 |
| 45421  | S624.00 | Closed traumatic extradural haemorrhage                      |  | 1 |  | 1 |
| 43418  | S624.11 | Epidural haematoma following injury                          |  | 1 |  | 1 |
| 73471  | S625.00 | Open traumatic extradural haemorrhage                        |  | 1 |  | 1 |
| 51504  | S626.00 | Epidural haemorrhage                                         |  | 1 |  | 1 |
| 18411  | S62A.00 | Traumatic extradural haematoma                               |  | 1 |  | 1 |

|        |         |                                                              |   |   |  |   |
|--------|---------|--------------------------------------------------------------|---|---|--|---|
| 109369 | S62A100 | Traumatic extradural haematoma with open intracranial wound  |   | 1 |  | 1 |
| 31805  | G62..00 | Other and unspecified intracranial haemorrhage               |   | 1 |  | 1 |
| 20284  | G62z.00 | Intracranial haemorrhage NOS                                 |   | 1 |  | 1 |
| 31941  | A94y600 | Rupture of syphilitic cerebral aneurysm                      |   | 1 |  | 1 |
| 5682   | S62..00 | Cerebral haemorrhage following injury                        |   | 1 |  | 1 |
| 28077  | S62..14 | Traumatic cerebral haemorrhage                               |   | 1 |  | 1 |
| 46545  | S62z.00 | Cerebral haemorrhage following injury NOS                    |   | 1 |  | 1 |
| 52968  | S63..00 | Other cerebral haemorrhage following injury                  |   | 1 |  | 1 |
| 42283  | S63z.00 | Other cerebral haemorrhage following injury NOS              |   | 1 |  | 1 |
| 35916  | 7A20300 | Endarterectomy and patch repair of carotid artery            |   | 1 |  | 1 |
| 12733  | 7A20311 | Carotid endarterectomy and patch                             |   | 1 |  | 1 |
| 2654   | 7A20400 | Endarterectomy of carotid artery NEC                         |   | 1 |  | 1 |
| 93134  | 7A20500 | High-flow inter extrac intrac byp ext carot art mid cer art  |   | 1 |  | 1 |
| 89365  | 7A20600 | Byp carot art anastom superfic tempor artery middle cere art |   | 1 |  | 1 |
| 91775  | 7A20700 | Intracranial bypass from carotid artery NEC                  |   | 1 |  | 1 |
| 29973  | 7A22000 | Percutaneous transluminal angioplasty of carotid artery      |   | 1 |  | 1 |
| 47580  | 7A22300 | Percutaneous transluminal insertion stent carotid artery     |   | 1 |  | 1 |
| 93770  | 7A25600 | Percutaneous transluminal insertion of stent cerebral artery |   | 1 |  | 1 |
| 68906  | 7A26C00 | Endarterectomy of vertebral artery NEC                       |   | 1 |  | 1 |
| 55074  | 7A28200 | Percutaneous transluminal angioplasty of vertebral artery    |   | 1 |  | 1 |
| 68905  | 7A28500 | Percutaneous transluminal embolectomy of vertebral artery    |   | 1 |  | 1 |
| 45476  | 14AL.00 | H/O: Treatment for ischaemic heart disease                   | 1 |   |  |   |
| 11798  | 14A..12 | H/O: myocardial problem                                      | 1 |   |  |   |
| 32526  | 14AA.00 | H/O: heart disease NOS                                       | 1 |   |  |   |
| 3468   | 662..00 | Cardiac disease monitoring                                   | 1 |   |  |   |
| 1537   | 662..11 | Heart disease monitoring                                     | 1 |   |  |   |
| 46664  | 6625    | Cardiac drug side effects                                    | 1 |   |  |   |
| 26044  | 6626    | Cardiac treatment changed                                    | 1 |   |  |   |
| 34488  | 662J.00 | Cardiac drug monitoring                                      | 1 |   |  |   |
| 42659  | 662JZ00 | Cardiac drug monitoring NOS                                  | 1 |   |  |   |
| 13187  | 662N.00 | CHD monitoring                                               | 1 |   |  |   |
| 19298  | 662Y.00 | Cardiac event recording                                      | 1 |   |  |   |
| 17681  | 662Z.00 | Cardiac disease monitoring NOS                               | 1 |   |  |   |

|        |         |                                                              |   |  |  |  |
|--------|---------|--------------------------------------------------------------|---|--|--|--|
| 19185  | 66f..00 | Cardiovascular disease monitoring                            | 1 |  |  |  |
| 48981  | 66f1.00 | Cardiovascular disease interim monitoring                    | 1 |  |  |  |
| 19164  | 7927100 | Repair of aneurysm of coronary artery                        | 1 |  |  |  |
| 72925  | 8A51.00 | Cardiac emergency monitoring                                 | 1 |  |  |  |
| 100496 | 8CEJ.00 | Coronary heart disease leaflet given                         | 1 |  |  |  |
| 103932 | 8CMP.00 | Coronary heart disease care plan                             | 1 |  |  |  |
| 8516   | 8F9..00 | Cardiac rehabilitation                                       | 1 |  |  |  |
| 37990  | 8F90.00 | Cardiac rehabilitation - phase 1                             | 1 |  |  |  |
| 37991  | 8F91.00 | Cardiac rehabilitation - phase 2                             | 1 |  |  |  |
| 41032  | 8F92.00 | Cardiac rehabilitation - phase 3                             | 1 |  |  |  |
| 46565  | 8F93.00 | Cardiac rehabilitation - phase 4                             | 1 |  |  |  |
| 104675 | 8F97.00 | Cardiac rehabilitation programme completed                   | 1 |  |  |  |
| 110535 | 8F98.00 | Cardiac rehabilitation programme offered                     | 1 |  |  |  |
| 38379  | 8H11.00 | Admit to cardiac ITU                                         | 1 |  |  |  |
| 30027  | 8H2Q.00 | Admit cardiology emergency                                   | 1 |  |  |  |
| 106415 | 8H44000 | Referral to cardiology multidisciplinary team                | 1 |  |  |  |
| 10127  | 8H7v.00 | Referral to cardiac rehabilitation nurse                     | 1 |  |  |  |
| 104176 | 8HRG.00 | Referral for cardiac event recording                         | 1 |  |  |  |
| 102447 | 8Hkk.00 | Referral to cardiac rehabilitation programme                 | 1 |  |  |  |
| 102943 | 8Hkl.00 | Referral to cardiac rehabilitation service by secondary care | 1 |  |  |  |
| 103632 | 8Hkt.00 | Referral to community cardiology service                     | 1 |  |  |  |
| 19744  | 8I37.00 | Coronary heart disease monitoring refused                    | 1 |  |  |  |
| 19250  | 8I3a.00 | Cardiac rehabilitation declined                              | 1 |  |  |  |
| 102914 | 8IE3.00 | Referral to cardiac rehabilitation programme declined        | 1 |  |  |  |
| 18150  | 9Ob..00 | Coronary heart disease monitoring administration             | 1 |  |  |  |
| 35373  | 9Ob0.00 | Attends coronary heart disease monitoring                    | 1 |  |  |  |
| 35277  | 9Ob1.00 | Refuses coronary heart disease monitoring                    | 1 |  |  |  |
| 47798  | 9Ob2.00 | Coronary heart disease monitoring default                    | 1 |  |  |  |
| 25814  | 9Ob3.00 | Coronary heart disease monitoring 1st letter                 | 1 |  |  |  |
| 34207  | 9Ob4.00 | Coronary heart disease monitoring 2nd letter                 | 1 |  |  |  |
| 34329  | 9Ob5.00 | Coronary heart disease monitoring 3rd letter                 | 1 |  |  |  |
| 37908  | 9Ob6.00 | Coronary heart disease monitoring verbal invitation          | 1 |  |  |  |
| 54007  | 9Ob7.00 | Coronary heart disease monitoring deleted                    | 1 |  |  |  |

|        |         |                                                          |   |  |  |  |  |
|--------|---------|----------------------------------------------------------|---|--|--|--|--|
| 39500  | 9Ob8.00 | Coronary heart disease monitoring check done             | 1 |  |  |  |  |
| 70160  | 9Ob9.00 | Coronary heart disease monitoring telephone invite       | 1 |  |  |  |  |
| 10963  | 9h0..00 | Exception reporting: CHD quality indicators              | 1 |  |  |  |  |
| 11038  | 9h01.00 | Excepted from CHD quality indicators: Patient unsuitable | 1 |  |  |  |  |
| 10910  | 9h02.00 | Excepted from CHD quality indicators: Informed dissent   | 1 |  |  |  |  |
| 13250  | G....12 | Cardiac diseases                                         | 1 |  |  |  |  |
| 10109  | G....13 | Heart diseases                                           | 1 |  |  |  |  |
| 6331   | G341.00 | Aneurysm of heart                                        | 1 |  |  |  |  |
| 27484  | G341.11 | Cardiac aneurysm                                         | 1 |  |  |  |  |
| 2155   | G341000 | Ventricular cardiac aneurysm                             | 1 |  |  |  |  |
| 67087  | G341100 | Other cardiac wall aneurysm                              | 1 |  |  |  |  |
| 105250 | G341111 | Mural cardiac aneurysm                                   | 1 |  |  |  |  |
| 59193  | G341200 | Aneurysm of coronary vessels                             | 1 |  |  |  |  |
| 41677  | G341z00 | Aneurysm of heart NOS                                    | 1 |  |  |  |  |
| 30171  | G5...00 | Other forms of heart disease                             | 1 |  |  |  |  |
| 36193  | G5y..00 | Other specified heart disease                            | 1 |  |  |  |  |
| 59687  | G5yy.00 | Other ill-defined heart disease                          | 1 |  |  |  |  |
| 41179  | G5yyz00 | Other ill-defined heart disease NOS                      | 1 |  |  |  |  |
| 1811   | G5yz.00 | Other heart disease NOS                                  | 1 |  |  |  |  |
| 1490   | G5z..00 | Heart disease NOS                                        | 1 |  |  |  |  |
| 68979  | Gyu5.00 | [X]Other forms of heart disease                          | 1 |  |  |  |  |
| 18218  | Z677.00 | Cardiac rehabilitation class                             | 1 |  |  |  |  |
| 10662  | ZL18300 | Under care of cardiologist                               | 1 |  |  |  |  |
| 32666  | ZL1G200 | Under care of cardiothoracic surgeon                     | 1 |  |  |  |  |
| 42669  | ZL1G400 | Under care of cardiac surgeon                            | 1 |  |  |  |  |
| 19067  | ZL22200 | Under care of cardiac rehabilitation nurse               | 1 |  |  |  |  |
| 23098  | ZV57900 | [V]Cardiac rehabilitation                                | 1 |  |  |  |  |
| 18135  | 6A2..00 | Coronary heart disease annual review                     | 1 |  |  |  |  |
| 10260  | 6A4..00 | Coronary heart disease review                            | 1 |  |  |  |  |
| 11648  | 8B3k.00 | Coronary heart disease medication review                 | 1 |  |  |  |  |
| 95550  | 8H2V.00 | Admit ischaemic heart disease emergency                  | 1 |  |  |  |  |
| 240    | G3...00 | Ischaemic heart disease                                  | 1 |  |  |  |  |
| 24783  | G3...11 | Arteriosclerotic heart disease                           | 1 |  |  |  |  |



|       |         |                                                             |   |  |  |  |  |
|-------|---------|-------------------------------------------------------------|---|--|--|--|--|
| 20416 | G3...12 | Atherosclerotic heart disease                               | 1 |  |  |  |  |
| 1792  | G3...13 | IHD - Ischaemic heart disease                               | 1 |  |  |  |  |
| 27951 | G31..00 | Other acute and subacute ischaemic heart disease            | 1 |  |  |  |  |
| 61072 | G311000 | Myocardial infarction aborted                               | 1 |  |  |  |  |
| 55137 | G311011 | MI - myocardial infarction aborted                          | 1 |  |  |  |  |
| 9413  | G31y.00 | Other acute and subacute ischaemic heart disease            | 1 |  |  |  |  |
| 39693 | G31y200 | Subendocardial ischaemia                                    | 1 |  |  |  |  |
| 21844 | G31y300 | Transient myocardial ischaemia                              | 1 |  |  |  |  |
| 27977 | G31yz00 | Other acute and subacute ischaemic heart disease NOS        | 1 |  |  |  |  |
| 28138 | G34..00 | Other chronic ischaemic heart disease                       | 1 |  |  |  |  |
| 5413  | G340.00 | Coronary atherosclerosis                                    | 1 |  |  |  |  |
| 1344  | G340.12 | Coronary artery disease                                     | 1 |  |  |  |  |
| 7320  | G343.00 | Ischaemic cardiomyopathy                                    | 1 |  |  |  |  |
| 29421 | G344.00 | Silent myocardial ischaemia                                 | 1 |  |  |  |  |
| 34633 | G34y.00 | Other specified chronic ischaemic heart disease             | 1 |  |  |  |  |
| 23078 | G34y100 | Chronic myocardial ischaemia                                | 1 |  |  |  |  |
| 35713 | G34yz00 | Other specified chronic ischaemic heart disease NOS         | 1 |  |  |  |  |
| 15754 | G34z.00 | Other chronic ischaemic heart disease NOS                   | 1 |  |  |  |  |
| 18889 | G34z000 | Asymptomatic coronary heart disease                         | 1 |  |  |  |  |
| 22383 | G3y..00 | Other specified ischaemic heart disease                     | 1 |  |  |  |  |
| 1676  | G3z..00 | Ischaemic heart disease NOS                                 | 1 |  |  |  |  |
| 52517 | Gyu3.00 | [X]Ischaemic heart diseases                                 | 1 |  |  |  |  |
| 68401 | Gyu3200 | [X]Other forms of acute ischaemic heart disease             | 1 |  |  |  |  |
| 47637 | Gyu3300 | [X]Other forms of chronic ischaemic heart disease           | 1 |  |  |  |  |
| 23268 | 5853    | U-S heart scan                                              | 1 |  |  |  |  |
| 1271  | 5853.11 | Echocardiogram                                              | 1 |  |  |  |  |
| 1432  | 5853000 | Echocardiogram normal                                       | 1 |  |  |  |  |
| 5245  | 5853100 | Echocardiogram abnormal                                     | 1 |  |  |  |  |
| 27851 | 5853z00 | U-S heart scan NOS                                          | 1 |  |  |  |  |
| 18508 | 585R.00 | Echocardiogram normal                                       | 1 |  |  |  |  |
| 11284 | 585f.00 | Echocardiogram shows left ventricular systolic dysfunction  | 1 |  |  |  |  |
| 11351 | 585g.00 | Echocardiogram shows left ventricular diastolic dysfunction | 1 |  |  |  |  |
| 12314 | 585k.00 | Echocardiogram shows normal left ventricular function       | 1 |  |  |  |  |

|        |         |                                                     |   |  |  |  |  |
|--------|---------|-----------------------------------------------------|---|--|--|--|--|
| 30917  | 5C20.00 | Echocardiogram equivocal                            | 1 |  |  |  |  |
| 3919   | 7935200 | Transoesophageal echocardiography                   | 1 |  |  |  |  |
| 89353  | 7935500 | Transluminal intracardiac echocardiography          | 1 |  |  |  |  |
| 26449  | 7P0H.00 | Diagnostic echocardiography                         | 1 |  |  |  |  |
| 26445  | 7P0H000 | Transthoracic echocardiography                      | 1 |  |  |  |  |
| 85952  | 7P0H100 | Transoesophageal echocardiography                   | 1 |  |  |  |  |
| 94626  | 7P0H300 | Epicardial echocardiography                         | 1 |  |  |  |  |
| 105341 | 7P0H600 | Contrast echocardiography                           | 1 |  |  |  |  |
| 99841  | 7P0Hy00 | Other specified diagnostic echocardiography         | 1 |  |  |  |  |
| 90493  | 7P0Hz00 | Diagnostic echocardiography NOS                     | 1 |  |  |  |  |
| 105649 | 8A54400 | Monitoring of cardiac output using echocardiography | 1 |  |  |  |  |
| 106377 | 9EV7.00 | Echocardiography report received                    | 1 |  |  |  |  |
| 101184 | 9Ee0800 | Adult echocardiography procedure report             | 1 |  |  |  |  |
| 10317  | R132000 | [D]Echocardiogram abnormal                          | 1 |  |  |  |  |
| 40366  | R132200 | [D]Ultrasound cardiogram abnormal                   | 1 |  |  |  |  |
| 15058  | 14A6.00 | H/O: heart failure                                  | 1 |  |  |  |  |
| 46912  | 14AM.00 | H/O: Heart failure in last year                     | 1 |  |  |  |  |
| 9913   | 1O1..00 | Heart failure confirmed                             | 1 |  |  |  |  |
| 100784 | 2126400 | Heart failure resolved                              | 1 |  |  |  |  |
| 106198 | 661M500 | Heart failure self-management plan agreed           | 1 |  |  |  |  |
| 30779  | 662W.00 | Heart failure annual review                         | 1 |  |  |  |  |
| 83502  | 662p.00 | Heart failure 6 month review                        | 1 |  |  |  |  |
| 24503  | 8B29.00 | Cardiac failure therapy                             | 1 |  |  |  |  |
| 103732 | 8CMK.00 | Has heart failure management plan                   | 1 |  |  |  |  |
| 32898  | 8H2S.00 | Admit heart failure emergency                       | 1 |  |  |  |  |
| 19380  | 9Or0.00 | Heart failure review completed                      | 1 |  |  |  |  |
| 22262  | G1yz100 | Rheumatic left ventricular failure                  | 1 |  |  |  |  |
| 50157  | G210.00 | Malignant hypertensive heart disease                | 1 |  |  |  |  |
| 95334  | G210000 | Malignant hypertensive heart disease without CCF    | 1 |  |  |  |  |
| 72668  | G210100 | Malignant hypertensive heart disease with CCF       | 1 |  |  |  |  |
| 103046 | G210z00 | Malignant hypertensive heart disease NOS            | 1 |  |  |  |  |
| 52127  | G211100 | Benign hypertensive heart disease with CCF          | 1 |  |  |  |  |
| 62718  | G21z100 | Hypertensive heart disease NOS with CCF             | 1 |  |  |  |  |

|        |         |                                                             |   |  |  |  |  |
|--------|---------|-------------------------------------------------------------|---|--|--|--|--|
| 67232  | G230.00 | Malignant hypertensive heart and renal disease              | 1 |  |  |  |  |
| 21837  | G232.00 | Hypertensive heart&renal dis wth (congestive) heart failure | 1 |  |  |  |  |
| 57987  | G234.00 | Hyperten heart&renal dis+both(congestv)heart and renal fail | 1 |  |  |  |  |
| 8464   | G400.00 | Acute cor pulmonale                                         | 1 |  |  |  |  |
| 5695   | G41z.11 | Chronic cor pulmonale                                       | 1 |  |  |  |  |
| 5141   | G554000 | Congestive cardiomyopathy                                   | 1 |  |  |  |  |
| 68766  | G554011 | Congestive obstructive cardiomyopathy                       | 1 |  |  |  |  |
| 2062   | G58..00 | Heart failure                                               | 1 |  |  |  |  |
| 1223   | G58..11 | Cardiac failure                                             | 1 |  |  |  |  |
| 398    | G580.00 | Congestive heart failure                                    | 1 |  |  |  |  |
| 2906   | G580.11 | Congestive cardiac failure                                  | 1 |  |  |  |  |
| 10079  | G580.12 | Right heart failure                                         | 1 |  |  |  |  |
| 10154  | G580.13 | Right ventricular failure                                   | 1 |  |  |  |  |
| 9524   | G580.14 | Biventricular failure                                       | 1 |  |  |  |  |
| 23707  | G580000 | Acute congestive heart failure                              | 1 |  |  |  |  |
| 32671  | G580100 | Chronic congestive heart failure                            | 1 |  |  |  |  |
| 27884  | G580200 | Decompensated cardiac failure                               | 1 |  |  |  |  |
| 11424  | G580300 | Compensated cardiac failure                                 | 1 |  |  |  |  |
| 94870  | G580400 | Congestive heart failure due to valvular disease            | 1 |  |  |  |  |
| 884    | G581.00 | Left ventricular failure                                    | 1 |  |  |  |  |
| 23481  | G581.11 | Asthma - cardiac                                            | 1 |  |  |  |  |
| 5942   | G581.13 | Impaired left ventricular function                          | 1 |  |  |  |  |
| 5255   | G581000 | Acute left ventricular failure                              | 1 |  |  |  |  |
| 27964  | G582.00 | Acute heart failure                                         | 1 |  |  |  |  |
| 101138 | G583.00 | Heart failure with normal ejection fraction                 | 1 |  |  |  |  |
| 101137 | G583.11 | HFNEF - heart failure with normal ejection fraction         | 1 |  |  |  |  |
| 106897 | G583.12 | Heart failure with preserved ejection fraction              | 1 |  |  |  |  |
| 104275 | G584.00 | Right ventricular failure                                   | 1 |  |  |  |  |
| 4024   | G58z.00 | Heart failure NOS                                           | 1 |  |  |  |  |
| 17278  | G58z.12 | Cardiac failure NOS                                         | 1 |  |  |  |  |
| 8966   | G5yy900 | Left ventricular systolic dysfunction                       | 1 |  |  |  |  |
| 12550  | G5yyA00 | Left ventricular diastolic dysfunction                      | 1 |  |  |  |  |
| 104876 | G5yyB00 | Right ventricular diastolic dysfunction                     | 1 |  |  |  |  |

|        |         |                                                       |   |   |  |  |
|--------|---------|-------------------------------------------------------|---|---|--|--|
| 107397 | G5yyD00 | Left ventricular cardiac dysfunction                  | 1 |   |  |  |
| 108180 | G5yyE00 | Right ventricular systolic dysfunction                | 1 |   |  |  |
| 20822  | Q48y100 | Congenital cardiac failure                            | 1 |   |  |  |
| 20324  | R2y1000 | [D]Cardiorespiratory failure                          | 1 |   |  |  |
| 41577  | 1477    | H/O: cerebrovascular disease                          |   | 1 |  |  |
| 19477  | E004.00 | Arteriosclerotic dementia                             |   | 1 |  |  |
| 43089  | E004000 | Uncomplicated arteriosclerotic dementia               |   | 1 |  |  |
| 56912  | E004100 | Arteriosclerotic dementia with delirium               |   | 1 |  |  |
| 55467  | E004200 | Arteriosclerotic dementia with paranoia               |   | 1 |  |  |
| 43292  | E004300 | Arteriosclerotic dementia with depression             |   | 1 |  |  |
| 42279  | E004z00 | Arteriosclerotic dementia NOS                         |   | 1 |  |  |
| 9565   | Eu01.11 | [X]Arteriosclerotic dementia                          |   | 1 |  |  |
| 2418   | G6...00 | Cerebrovascular disease                               |   | 1 |  |  |
| 45781  | G63..00 | Precerebral arterial occlusion                        |   | 1 |  |  |
| 63830  | G63..12 | Stenosis of precerebral arteries                      |   | 1 |  |  |
| 32447  | G630.00 | Basilar artery occlusion                              |   | 1 |  |  |
| 4240   | G631.00 | Carotid artery occlusion                              |   | 1 |  |  |
| 2156   | G631.11 | Stenosis, carotid artery                              |   | 1 |  |  |
| 4152   | G631.12 | Thrombosis, carotid artery                            |   | 1 |  |  |
| 40847  | G632.00 | Vertebral artery occlusion                            |   | 1 |  |  |
| 98642  | G633.00 | Multiple and bilateral precerebral arterial occlusion |   | 1 |  |  |
| 2652   | G634.00 | Carotid artery stenosis                               |   | 1 |  |  |
| 51326  | G63y.00 | Other precerebral artery occlusion                    |   | 1 |  |  |
| 71585  | G63z.00 | Precerebral artery occlusion NOS                      |   | 1 |  |  |
| 8837   | G64..00 | Cerebral arterial occlusion                           |   | 1 |  |  |
| 16517  | G640.00 | Cerebral thrombosis                                   |   | 1 |  |  |
| 15019  | G641.00 | Cerebral embolism                                     |   | 1 |  |  |
| 34758  | G641.11 | Cerebral embolus                                      |   | 1 |  |  |
| 18689  | G660.00 | Middle cerebral artery syndrome                       |   | 1 |  |  |
| 19280  | G661.00 | Anterior cerebral artery syndrome                     |   | 1 |  |  |
| 19260  | G662.00 | Posterior cerebral artery syndrome                    |   | 1 |  |  |
| 13577  | G67..00 | Other cerebrovascular disease                         |   | 1 |  |  |
| 24385  | G671100 | Chronic cerebral ischaemia                            |   | 1 |  |  |

|        |         |                                                              |  |   |  |   |
|--------|---------|--------------------------------------------------------------|--|---|--|---|
| 12555  | G671z00 | Generalised ischaemic cerebrovascular disease NOS            |  | 1 |  |   |
| 31704  | G677.00 | Occlusion/stenosis cerebral arts not result cerebral infarct |  | 1 |  |   |
| 51759  | G677000 | Occlusion and stenosis of middle cerebral artery             |  | 1 |  |   |
| 57527  | G677100 | Occlusion and stenosis of anterior cerebral artery           |  | 1 |  |   |
| 65770  | G677200 | Occlusion and stenosis of posterior cerebral artery          |  | 1 |  |   |
| 55602  | G677300 | Occlusion and stenosis of cerebellar arteries                |  | 1 |  |   |
| 71274  | G677400 | Occlusion+stenosis of multiple and bilat cerebral arteries   |  | 1 |  |   |
| 9943   | G678.00 | Cereb autosom dominant arteriop subcort infarcts leukoenceph |  | 1 |  |   |
| 98188  | G679.00 | Small vessel cerebrovascular disease                         |  | 1 |  |   |
| 34117  | G67y.00 | Other cerebrovascular disease OS                             |  | 1 |  |   |
| 37493  | G67z.00 | Other cerebrovascular disease NOS                            |  | 1 |  |   |
| 23361  | G68..00 | Late effects of cerebrovascular disease                      |  | 1 |  |   |
| 51138  | G68W.00 | Sequelae/other + unspecified cerebrovascular diseases        |  | 1 |  |   |
| 51311  | G6y..00 | Other specified cerebrovascular disease                      |  | 1 |  |   |
| 10062  | G6z..00 | Cerebrovascular disease NOS                                  |  | 1 |  |   |
| 37199  | G70y000 | Carotid artery atherosclerosis                               |  | 1 |  |   |
| 22677  | G70y011 | Carotid artery disease                                       |  | 1 |  |   |
| 73901  | Gyu6.00 | [X]Cerebrovascular diseases                                  |  | 1 |  |   |
| 109679 | 5C13.00 | Old cerebral infarction on imaging                           |  | 1 |  | 1 |
| 39403  | G683.00 | Sequelae of cerebral infarction                              |  | 1 |  | 1 |
| 57495  | G63..11 | Infarction - precerebral                                     |  | 1 |  | 1 |
| 23671  | G63y000 | Cerebral infarct due to thrombosis of precerebral arteries   |  | 1 |  | 1 |
| 24446  | G63y100 | Cerebral infarction due to embolism of precerebral arteries  |  | 1 |  | 1 |
| 5363   | G64..11 | CVA - cerebral artery occlusion                              |  | 1 |  | 1 |
| 569    | G64..12 | Infarction - cerebral                                        |  | 1 |  | 1 |
| 6155   | G64..13 | Stroke due to cerebral arterial occlusion                    |  | 1 |  | 1 |
| 36717  | G640000 | Cerebral infarction due to thrombosis of cerebral arteries   |  | 1 |  | 1 |
| 27975  | G641000 | Cerebral infarction due to embolism of cerebral arteries     |  | 1 |  | 1 |
| 3149   | G64z.00 | Cerebral infarction NOS                                      |  | 1 |  | 1 |
| 15252  | G64z.11 | Brainstem infarction NOS                                     |  | 1 |  | 1 |
| 5602   | G64z.12 | Cerebellar infarction                                        |  | 1 |  | 1 |
| 25615  | G64z000 | Brainstem infarction                                         |  | 1 |  | 1 |
| 9985   | G64z200 | Left sided cerebral infarction                               |  | 1 |  | 1 |

|        |         |                                                              |   |   |   |   |
|--------|---------|--------------------------------------------------------------|---|---|---|---|
| 10504  | G64z300 | Right sided cerebral infarction                              |   | 1 |   | 1 |
| 26424  | G64z400 | Infarction of basal ganglia                                  |   | 1 |   | 1 |
| 39344  | G676000 | Cereb infarct due cerebral venous thrombosis, nonpyogenic    |   | 1 |   | 1 |
| 101733 | G67A.00 | Cerebral vein thrombosis                                     |   | 1 |   | 1 |
| 40758  | G6W..00 | Cereb infarct due unsp occlus/stenos precerebr arteries      |   | 1 |   | 1 |
| 33543  | G6X..00 | Cerebrl infarctn due/unspcf occlusn or sten/cerebrl artr     |   | 1 |   | 1 |
| 91627  | Gyu6300 | [X]Cerebrl infarctn due/unspcf occlusn or sten/cerebrl artr  |   | 1 |   | 1 |
| 53745  | Gyu6400 | [X]Other cerebral infarction                                 |   | 1 |   | 1 |
| 90572  | Gyu6500 | [X]Occlusion and stenosis of other precerebral arteries      |   | 1 |   | 1 |
| 92036  | Gyu6600 | [X]Occlusion and stenosis of other cerebral arteries         |   | 1 |   | 1 |
| 94482  | Gyu6G00 | [X]Cereb infarct due unsp occlus/stenos precerebr arteries   |   | 1 |   | 1 |
| 33650  | 7929100 | Percut transluminal coronary thrombolysis with streptokinase | 1 |   | 1 |   |
| 40996  | 7929111 | Percut translum coronary thrombolytic therapy- streptokinase | 1 |   | 1 |   |
| 94504  | 8B3a.00 | Door to needle time                                          | 1 |   | 1 |   |
| 70440  | 8B3g.00 | Pain to thrombolysis time                                    | 1 |   | 1 |   |
| 35674  | 14A3.00 | H/O: myocardial infarct <60                                  | 1 |   | 1 |   |
| 40399  | 14A4.00 | H/O: myocardial infarct >60                                  | 1 |   | 1 |   |
| 50372  | 14AH.00 | H/O: Myocardial infarction in last year                      | 1 |   | 1 |   |
| 100139 | 14AT.00 | History of myocardial infarction                             | 1 |   | 1 |   |
| 23579  | G310.00 | Postmyocardial infarction syndrome                           | 1 |   | 1 |   |
| 4017   | G32..00 | Old myocardial infarction                                    | 1 |   | 1 |   |
| 16408  | G32..11 | Healed myocardial infarction                                 | 1 |   | 1 |   |
| 17464  | G32..12 | Personal history of myocardial infarction                    | 1 |   | 1 |   |
| 9555   | G33z500 | Post infarct angina                                          | 1 |   | 1 |   |
| 36423  | G36..00 | Certain current complication follow acute myocardial infarct | 1 |   | 1 |   |
| 24126  | G360.00 | Haemopericardium/current comp folow acut myocard infarct     | 1 |   | 1 |   |
| 23708  | G361.00 | Atrial septal defect/curr comp folow acut myocard infarct    | 1 |   | 1 |   |
| 37657  | G362.00 | Ventric septal defect/curr comp fol acut myocard infarctn    | 1 |   | 1 |   |
| 59189  | G363.00 | Ruptur cardiac wall w/out haemopericard/cur comp fol ac MI   | 1 |   | 1 |   |
| 59940  | G364.00 | Ruptur chordae tendinae/curr comp fol acute myocard infarct  | 1 |   | 1 |   |
| 69474  | G365.00 | Rupture papillary muscle/curr comp fol acute myocard infarct | 1 |   | 1 |   |
| 29553  | G366.00 | Thrombosis atrium,auric append&vent/curr comp foll acute MI  | 1 |   | 1 |   |
| 35119  | G501.00 | Post infarction pericarditis                                 | 1 |   | 1 |   |

|       |         |                                                            |   |  |  |   |  |
|-------|---------|------------------------------------------------------------|---|--|--|---|--|
| 61670 | 889A.00 | Diab mellit insulin-glucose infus acute myocardial infarct | 1 |  |  | 1 |  |
| 241   | G30..00 | Acute myocardial infarction                                | 1 |  |  | 1 |  |
| 13566 | G30..11 | Attack - heart                                             | 1 |  |  | 1 |  |
| 2491  | G30..12 | Coronary thrombosis                                        | 1 |  |  | 1 |  |
| 30421 | G30..13 | Cardiac rupture following myocardial infarction (MI)       | 1 |  |  | 1 |  |
| 1204  | G30..14 | Heart attack                                               | 1 |  |  | 1 |  |
| 1677  | G30..15 | MI - acute myocardial infarction                           | 1 |  |  | 1 |  |
| 13571 | G30..16 | Thrombosis - coronary                                      | 1 |  |  | 1 |  |
| 17689 | G30..17 | Silent myocardial infarction                               | 1 |  |  | 1 |  |
| 12139 | G300.00 | Acute anterolateral infarction                             | 1 |  |  | 1 |  |
| 5387  | G301.00 | Other specified anterior myocardial infarction             | 1 |  |  | 1 |  |
| 40429 | G301000 | Acute anteroapical infarction                              | 1 |  |  | 1 |  |
| 17872 | G301100 | Acute anteroseptal infarction                              | 1 |  |  | 1 |  |
| 14897 | G301z00 | Anterior myocardial infarction NOS                         | 1 |  |  | 1 |  |
| 8935  | G302.00 | Acute inferolateral infarction                             | 1 |  |  | 1 |  |
| 29643 | G303.00 | Acute inferoposterior infarction                           | 1 |  |  | 1 |  |
| 23892 | G304.00 | Posterior myocardial infarction NOS                        | 1 |  |  | 1 |  |
| 14898 | G305.00 | Lateral myocardial infarction NOS                          | 1 |  |  | 1 |  |
| 63467 | G306.00 | True posterior myocardial infarction                       | 1 |  |  | 1 |  |
| 3704  | G307.00 | Acute subendocardial infarction                            | 1 |  |  | 1 |  |
| 9507  | G307000 | Acute non-Q wave infarction                                | 1 |  |  | 1 |  |
| 1678  | G308.00 | Inferior myocardial infarction NOS                         | 1 |  |  | 1 |  |
| 30330 | G309.00 | Acute Q-wave infarct                                       | 1 |  |  | 1 |  |
| 17133 | G30A.00 | Mural thrombosis                                           | 1 |  |  | 1 |  |
| 32854 | G30B.00 | Acute posterolateral myocardial infarction                 | 1 |  |  | 1 |  |
| 29758 | G30X.00 | Acute transmural myocardial infarction of unspecif site    | 1 |  |  | 1 |  |
| 34803 | G30y.00 | Other acute myocardial infarction                          | 1 |  |  | 1 |  |
| 28736 | G30y000 | Acute atrial infarction                                    | 1 |  |  | 1 |  |
| 62626 | G30y100 | Acute papillary muscle infarction                          | 1 |  |  | 1 |  |
| 41221 | G30y200 | Acute septal infarction                                    | 1 |  |  | 1 |  |
| 46017 | G30yz00 | Other acute myocardial infarction NOS                      | 1 |  |  | 1 |  |
| 14658 | G30z.00 | Acute myocardial infarction NOS                            | 1 |  |  | 1 |  |
| 15661 | G310.11 | Dressler's syndrome                                        | 1 |  |  | 1 |  |

|        |         |                                                              |   |  |  |   |  |
|--------|---------|--------------------------------------------------------------|---|--|--|---|--|
| 68357  | G31y100 | Microinfarction of heart                                     | 1 |  |  | 1 |  |
| 18842  | G35..00 | Subsequent myocardial infarction                             | 1 |  |  | 1 |  |
| 45809  | G350.00 | Subsequent myocardial infarction of anterior wall            | 1 |  |  | 1 |  |
| 38609  | G351.00 | Subsequent myocardial infarction of inferior wall            | 1 |  |  | 1 |  |
| 72562  | G353.00 | Subsequent myocardial infarction of other sites              | 1 |  |  | 1 |  |
| 46166  | G35X.00 | Subsequent myocardial infarction of unspecified site         | 1 |  |  | 1 |  |
| 32272  | G38..00 | Postoperative myocardial infarction                          | 1 |  |  | 1 |  |
| 46112  | G380.00 | Postoperative transmural myocardial infarction anterior wall | 1 |  |  | 1 |  |
| 46276  | G381.00 | Postoperative transmural myocardial infarction inferior wall | 1 |  |  | 1 |  |
| 106812 | G383.00 | Postoperative transmural myocardial infarction unspec site   | 1 |  |  | 1 |  |
| 41835  | G384.00 | Postoperative subendocardial myocardial infarction           | 1 |  |  | 1 |  |
| 68748  | G38z.00 | Postoperative myocardial infarction, unspecified             | 1 |  |  | 1 |  |
| 96838  | Gyu3400 | [X]Acute transmural myocardial infarction of unspecif site   | 1 |  |  | 1 |  |
| 109035 | Gyu3500 | [X]Subsequent myocardial infarction of other sites           | 1 |  |  | 1 |  |
| 99991  | Gyu3600 | [X]Subsequent myocardial infarction of unspecified site      | 1 |  |  | 1 |  |
| 10562  | G307100 | Acute non-ST segment elevation myocardial infarction         | 1 |  |  | 1 |  |
| 19825  | 5593    | Femoral arteriogram abnormal                                 |   |  |  | 1 |  |
| 41825  | 55A2.00 | Lower limb arteriogram abnorm.                               |   |  |  | 1 |  |
| 59534  | 14NB.00 | H/O: Peripheral vascular disease procedure                   |   |  |  | 1 |  |
| 109034 | 1M11000 | Ischaemic foot pain at rest                                  |   |  |  | 1 |  |
| 109217 | 1M11100 | Ischaemic foot pain when walking                             |   |  |  | 1 |  |
| 9561   | 2G63.00 | Ischaemic toe                                                |   |  |  | 1 |  |
| 35399  | C107.00 | Diabetes mellitus with peripheral circulatory disorder       |   |  |  | 1 |  |
| 32403  | C107.11 | Diabetes mellitus with gangrene                              |   |  |  | 1 |  |
| 32556  | C107.12 | Diabetes with gangrene                                       |   |  |  | 1 |  |
| 70448  | C107000 | Diabetes mellitus, juvenile +peripheral circulatory disorder |   |  |  | 1 |  |
| 63357  | C107100 | Diabetes mellitus, adult, + peripheral circulatory disorder  |   |  |  | 1 |  |
| 33807  | C107200 | Diabetes mellitus, adult with gangrene                       |   |  |  | 1 |  |
| 69124  | C107300 | IDDM with peripheral circulatory disorder                    |   |  |  | 1 |  |
| 56803  | C107400 | NIDDM with peripheral circulatory disorder                   |   |  |  | 1 |  |
| 65025  | C107z00 | Diabetes mellitus NOS with peripheral circulatory disorder   |   |  |  | 1 |  |
| 60499  | C108600 | Insulin dependent diabetes mellitus with gangrene            |   |  |  | 1 |  |
| 64446  | C108G00 | Insulin dependent diab mell with peripheral angiopathy       |   |  |  | 1 |  |



|        |         |                                                       |  |  |  |   |  |  |
|--------|---------|-------------------------------------------------------|--|--|--|---|--|--|
| 40401  | C109500 | Non-insulin dependent diabetes mellitus with gangrene |  |  |  | 1 |  |  |
| 62107  | C109511 | Type II diabetes mellitus with gangrene               |  |  |  | 1 |  |  |
| 46150  | C109512 | Type 2 diabetes mellitus with gangrene                |  |  |  | 1 |  |  |
| 54212  | C109F00 | Non-insulin-dependent d m with peripheral angiopath   |  |  |  | 1 |  |  |
| 54899  | C109F11 | Type II diabetes mellitus with peripheral angiopathy  |  |  |  | 1 |  |  |
| 60699  | C109F12 | Type 2 diabetes mellitus with peripheral angiopathy   |  |  |  | 1 |  |  |
| 69993  | C10E600 | Type 1 diabetes mellitus with gangrene                |  |  |  | 1 |  |  |
| 102112 | C10E611 | Type I diabetes mellitus with gangrene                |  |  |  | 1 |  |  |
| 109051 | C10E612 | Insulin dependent diabetes mellitus with gangrene     |  |  |  | 1 |  |  |
| 93468  | C10EG00 | Type 1 diabetes mellitus with peripheral angiopathy   |  |  |  | 1 |  |  |
| 12736  | C10F500 | Type 2 diabetes mellitus with gangrene                |  |  |  | 1 |  |  |
| 104323 | C10F511 | Type II diabetes mellitus with gangrene               |  |  |  | 1 |  |  |
| 37806  | C10FF00 | Type 2 diabetes mellitus with peripheral angiopathy   |  |  |  | 1 |  |  |
| 104639 | C10FF11 | Type II diabetes mellitus with peripheral angiopathy  |  |  |  | 1 |  |  |
| 14797  | G702.00 | Extremity artery atheroma                             |  |  |  | 1 |  |  |
| 16260  | G702z00 | Extremity artery atheroma NOS                         |  |  |  | 1 |  |  |
| 5943   | G73..00 | Other peripheral vascular disease                     |  |  |  | 1 |  |  |
| 5702   | G73..11 | Peripheral ischaemic vascular disease                 |  |  |  | 1 |  |  |
| 1826   | G73..12 | Ischaemia of legs                                     |  |  |  | 1 |  |  |
| 6827   | G73..13 | Peripheral ischaemia                                  |  |  |  | 1 |  |  |
| 98174  | G733.00 | Ischaemic foot                                        |  |  |  | 1 |  |  |
| 105317 | G734.00 | Peripheral arterial disease                           |  |  |  | 1 |  |  |
| 38907  | G73y.00 | Other specified peripheral vascular disease           |  |  |  | 1 |  |  |
| 34152  | G73y000 | Diabetic peripheral angiopathy                        |  |  |  | 1 |  |  |
| 23871  | G73y100 | Peripheral angiopathic disease EC NOS                 |  |  |  | 1 |  |  |
| 4325   | G73yz00 | Other specified peripheral vascular disease NOS       |  |  |  | 1 |  |  |
| 3530   | G73z.00 | Peripheral vascular disease NOS                       |  |  |  | 1 |  |  |
| 1517   | G73z000 | Intermittent claudication                             |  |  |  | 1 |  |  |
| 6853   | G73z011 | Claudication                                          |  |  |  | 1 |  |  |
| 101866 | G73z012 | Vascular claudication                                 |  |  |  | 1 |  |  |
| 2760   | G73zz00 | Peripheral vascular disease NOS                       |  |  |  | 1 |  |  |
| 15302  | G742z00 | Peripheral arterial embolism and thrombosis NOS       |  |  |  | 1 |  |  |
| 73961  | Gyu7400 | [X]Other specified peripheral vascular diseases       |  |  |  | 1 |  |  |

|        |         |                                                              |  |  |  |   |  |  |
|--------|---------|--------------------------------------------------------------|--|--|--|---|--|--|
| 6308   | M271.12 | Ischaemic leg ulcer                                          |  |  |  | 1 |  |  |
| 24327  | M271000 | Ischaemic ulcer diabetic foot                                |  |  |  | 1 |  |  |
| 53634  | R054200 | [D]Gangrene of toe in diabetic                               |  |  |  | 1 |  |  |
| 31053  | R054300 | [D]Widespread diabetic foot gangrene                         |  |  |  | 1 |  |  |
| 95573  | 7A10000 | Emerg aortic bypass by anastomosis axillary to femoral art   |  |  |  | 1 |  |  |
| 23352  | 7A10100 | Bypass aorta by anastomosis axillary to femoral artery NEC   |  |  |  | 1 |  |  |
| 34153  | 7A10200 | Axillo-bifemoral bypass graft                                |  |  |  | 1 |  |  |
| 40302  | 7A10300 | Axillo-unifemoral PTFE bypass graft                          |  |  |  | 1 |  |  |
| 36952  | 7A12.00 | Other bypass of bifurcation of aorta                         |  |  |  | 1 |  |  |
| 48755  | 7A12000 | Emerg bypass bifurc aorta by anast aorta to femoral artery   |  |  |  | 1 |  |  |
| 2761   | 7A12100 | Bypass bifurc aorta by anastom aorta to femoral artery NEC   |  |  |  | 1 |  |  |
| 14895  | 7A12111 | Aorto bifemoral graft                                        |  |  |  | 1 |  |  |
| 28166  | 7A12112 | Dacron aortofemoral Y graft                                  |  |  |  | 1 |  |  |
| 15532  | 7A12300 | Bypass bifurcation aorta by anastom aorta to iliac artery    |  |  |  | 1 |  |  |
| 3778   | 7A12311 | Aorto biiliac graft                                          |  |  |  | 1 |  |  |
| 42465  | 7A12312 | Dacron aortoiliac Y graft                                    |  |  |  | 1 |  |  |
| 55825  | 7A12y00 | Other specified other bypass of bifurcation of aorta         |  |  |  | 1 |  |  |
| 64798  | 7A12z00 | Other bypass of bifurcation of aorta NOS                     |  |  |  | 1 |  |  |
| 55402  | 7A19200 | Open embolectomy of bifurcation of aorta                     |  |  |  | 1 |  |  |
| 21927  | 7A41.00 | Other bypass of iliac artery                                 |  |  |  | 1 |  |  |
| 101910 | 7A41.11 | Other bypass of iliac artery by anastomosis                  |  |  |  | 1 |  |  |
| 44250  | 7A41000 | Emerg bypass iliac art by iliac/femoral art anastomosis NEC  |  |  |  | 1 |  |  |
| 28616  | 7A41100 | Bypass iliac artery by iliac/femoral artery anastomosis NEC  |  |  |  | 1 |  |  |
| 72448  | 7A41200 | Emerg bypass iliac artery by femoral/femoral art anast NEC   |  |  |  | 1 |  |  |
| 43648  | 7A41211 | Emergency femoro-femoral prosthetic cross over graft         |  |  |  | 1 |  |  |
| 36443  | 7A41300 | Bypass iliac artery by femoral/femoral art anastomosis NEC   |  |  |  | 1 |  |  |
| 30989  | 7A41311 | Femoro-femoral prosthetic cross over graft                   |  |  |  | 1 |  |  |
| 68141  | 7A41400 | Emerg bypass comm iliac art by aorta/com iliac art anast NEC |  |  |  | 1 |  |  |
| 66917  | 7A41600 | Emerg bypass leg artery by aorta/com fem art anastomosis NEC |  |  |  | 1 |  |  |
| 32492  | 7A41900 | Bypass common iliac artery by aorta/com iliac art anast NEC  |  |  |  | 1 |  |  |
| 55554  | 7A41B00 | Bypass leg artery by aorta/com femoral art anastomosis NEC   |  |  |  | 1 |  |  |
| 66804  | 7A41C00 | Bypass leg artery by aorta/deep femoral art anastomosis NEC  |  |  |  | 1 |  |  |
| 100036 | 7A41D00 | Bypass iliac artery by iliac/iliac artery anastomosis NEC    |  |  |  | 1 |  |  |

|        |         |                                                              |  |  |  |   |  |  |
|--------|---------|--------------------------------------------------------------|--|--|--|---|--|--|
| 41768  | 7A41F00 | Ilio-femoral prosthetic cross over graft                     |  |  |  | 1 |  |  |
| 52357  | 7A41y00 | Other specified other bypass of iliac artery                 |  |  |  | 1 |  |  |
| 38921  | 7A41z00 | Other bypass of iliac artery NOS                             |  |  |  | 1 |  |  |
| 39039  | 7A42.00 | Reconstruction of iliac artery                               |  |  |  | 1 |  |  |
| 63280  | 7A42.11 | Reconstruction of common iliac artery                        |  |  |  | 1 |  |  |
| 62818  | 7A42000 | Endarterectomy and patch repair of iliac artery              |  |  |  | 1 |  |  |
| 36065  | 7A42011 | Endarterectomy and patch repair of common iliac artery       |  |  |  | 1 |  |  |
| 59602  | 7A42012 | Iliac endarterectomy and patch                               |  |  |  | 1 |  |  |
| 51211  | 7A42100 | Endarterectomy of iliac artery NEC                           |  |  |  | 1 |  |  |
| 44430  | 7A42111 | Endarterectomy of common iliac artery NEC                    |  |  |  | 1 |  |  |
| 50894  | 7A42y00 | Other specified reconstruction of iliac artery               |  |  |  | 1 |  |  |
| 62866  | 7A42z00 | Reconstruction of iliac artery NOS                           |  |  |  | 1 |  |  |
| 51331  | 7A43.00 | Other open operations on iliac artery                        |  |  |  | 1 |  |  |
| 53580  | 7A43.11 | Other open operations on common iliac artery                 |  |  |  | 1 |  |  |
| 61256  | 7A43000 | Repair of iliac artery NEC                                   |  |  |  | 1 |  |  |
| 66437  | 7A43011 | Repair of common iliac artery NEC                            |  |  |  | 1 |  |  |
| 61255  | 7A43100 | Open embolectomy of iliac artery                             |  |  |  | 1 |  |  |
| 47562  | 7A43111 | Open embolectomy of common iliac artery                      |  |  |  | 1 |  |  |
| 34037  | 7A43300 | Open insertion of iliac artery stent                         |  |  |  | 1 |  |  |
| 10827  | 7A44000 | Percutaneous transluminal angioplasty of iliac artery        |  |  |  | 1 |  |  |
| 66930  | 7A44100 | Percutaneous transluminal embolectomy of iliac artery        |  |  |  | 1 |  |  |
| 7111   | 7A44300 | Insertion of iliac artery stent                              |  |  |  | 1 |  |  |
| 24229  | 7A44400 | Percutaneous transluminal insertion of iliac artery stent    |  |  |  | 1 |  |  |
| 28894  | 7A44y00 | Other specified transluminal operation on iliac artery       |  |  |  | 1 |  |  |
| 55877  | 7A44z00 | Transluminal operation on iliac artery NOS                   |  |  |  | 1 |  |  |
| 9099   | 7A47.00 | Other emergency bypass of femoral artery or popliteal artery |  |  |  | 1 |  |  |
| 72491  | 7A47.11 | Other emerg bypass femoral or popliteal art by anastomosis   |  |  |  | 1 |  |  |
| 100113 | 7A47.12 | Other emergency bypass of common femoral artery              |  |  |  | 1 |  |  |
| 63238  | 7A47.13 | Other emergency bypass of deep femoral artery                |  |  |  | 1 |  |  |
| 39776  | 7A47.14 | Other emergency bypass of popliteal artery                   |  |  |  | 1 |  |  |
| 97606  | 7A47.15 | Other emergency bypass of superficial femoral artery         |  |  |  | 1 |  |  |
| 11766  | 7A47.16 | Other emergency bypass of femoral artery                     |  |  |  | 1 |  |  |
| 43651  | 7A47000 | Emerg bypass femoral art by fem/pop art anast c prosth NEC   |  |  |  | 1 |  |  |

|        |         |                                                              |  |  |   |  |  |
|--------|---------|--------------------------------------------------------------|--|--|---|--|--|
| 67818  | 7A47100 | Emerg bypass popliteal art by pop/pop art anast c prosth NEC |  |  | 1 |  |  |
| 52342  | 7A47200 | Emerg bypass femoral art by fem/pop a anast c vein graft NEC |  |  | 1 |  |  |
| 60693  | 7A47300 | Emerg bypass pop art by pop/pop art anast c vein graft NEC   |  |  | 1 |  |  |
| 66820  | 7A47400 | Emerg bypass femoral art by fem/tib art anast c prosth NEC   |  |  | 1 |  |  |
| 96255  | 7A47600 | Emerg bypass femoral art by fem/tib a anast c vein graft NEC |  |  | 1 |  |  |
| 66879  | 7A47700 | Emerg bypass pop art by pop/tib art anast c vein graft NEC   |  |  | 1 |  |  |
| 99676  | 7A47800 | Emerg bypass femoral art by fem/peron art anast c prosth NEC |  |  | 1 |  |  |
| 62775  | 7A47B00 | Emerg bypass pop art by pop/peron art anast c vein graft NEC |  |  | 1 |  |  |
| 48939  | 7A47C00 | Emerg bypass femoral artery by fem/fem art anastomosis NEC   |  |  | 1 |  |  |
| 70922  | 7A47D00 | Emerg bypass popliteal artery by pop/fem art anastomosis NEC |  |  | 1 |  |  |
| 65692  | 7A47y00 | Other emergency bypass of femoral or popliteal artery OS     |  |  | 1 |  |  |
| 68320  | 7A47z00 | Other emergency bypass of femoral or popliteal artery NOS    |  |  | 1 |  |  |
| 24692  | 7A48.00 | Other bypass of femoral artery or popliteal artery           |  |  | 1 |  |  |
| 61974  | 7A48.11 | Other bypass of femoral or popliteal artery by anastomosis   |  |  | 1 |  |  |
| 37787  | 7A48.12 | Other bypass of common femoral artery                        |  |  | 1 |  |  |
| 18060  | 7A48.14 | Other bypass of femoral artery                               |  |  | 1 |  |  |
| 12331  | 7A48.15 | Other bypass of popliteal artery                             |  |  | 1 |  |  |
| 40732  | 7A48.16 | Other bypass of superficial femoral artery                   |  |  | 1 |  |  |
| 27580  | 7A48000 | Bypass femoral artery by fem/pop art anast c prosthesis NEC  |  |  | 1 |  |  |
| 64555  | 7A48100 | Bypass popliteal artery by pop/pop a anast c prosthesis NEC  |  |  | 1 |  |  |
| 28030  | 7A48200 | Bypass femoral artery by fem/pop art anast c vein graft NEC  |  |  | 1 |  |  |
| 24097  | 7A48300 | Bypass popliteal artery by pop/pop a anast c vein graft NEC  |  |  | 1 |  |  |
| 39877  | 7A48400 | Bypass femoral artery by fem/tib art anast c prosthesis NEC  |  |  | 1 |  |  |
| 60465  | 7A48500 | Bypass popliteal artery by pop/tib a anast c prosthesis NEC  |  |  | 1 |  |  |
| 41823  | 7A48600 | Bypass femoral artery by fem/tib art anast c vein graft NEC  |  |  | 1 |  |  |
| 48700  | 7A48700 | Bypass popliteal artery by pop/tib a anast c vein graft NEC  |  |  | 1 |  |  |
| 67982  | 7A48800 | Bypass femoral artery by fem/peron a anast c prosthesis NEC  |  |  | 1 |  |  |
| 107158 | 7A48900 | Bypass popliteal artery by pop/peron art anast c prosth NEC  |  |  | 1 |  |  |
| 53675  | 7A48A00 | Bypass femoral artery by fem/peron a anast c vein graft NEC  |  |  | 1 |  |  |
| 68412  | 7A48B00 | Bypass popliteal art by pop/peron art anast c vein graft NEC |  |  | 1 |  |  |
| 45428  | 7A48C00 | Bypass femoral artery by femoral/femoral art anastomosis NEC |  |  | 1 |  |  |
| 42115  | 7A48D00 | Bypass popliteal artery by pop/fem artery anastomosis NEC    |  |  | 1 |  |  |
| 22016  | 7A48E00 | Femoro-femoral prosthetic cross over graft                   |  |  | 1 |  |  |

|       |         |                                                              |  |  |  |   |  |  |
|-------|---------|--------------------------------------------------------------|--|--|--|---|--|--|
| 42640 | 7A48y00 | Other bypass of femoral artery or popliteal artery OS        |  |  |  | 1 |  |  |
| 2066  | 7A48z00 | Other bypass of femoral artery or popliteal artery NOS       |  |  |  | 1 |  |  |
| 31338 | 7A49.00 | Reconstruction of femoral artery or popliteal artery         |  |  |  | 1 |  |  |
| 73822 | 7A49.11 | Reconstruction of common femoral artery                      |  |  |  | 1 |  |  |
| 63396 | 7A49.13 | Reconstruction of femoral artery                             |  |  |  | 1 |  |  |
| 28125 | 7A49.14 | Reconstruction of popliteal artery                           |  |  |  | 1 |  |  |
| 96809 | 7A49.15 | Reconstruction of superficial femoral artery                 |  |  |  | 1 |  |  |
| 28777 | 7A49000 | Endarterectomy and patch repair of femoral artery            |  |  |  | 1 |  |  |
| 52695 | 7A49100 | Endarterectomy and patch repair of popliteal artery          |  |  |  | 1 |  |  |
| 18816 | 7A49200 | Endarterectomy of femoral artery NEC                         |  |  |  | 1 |  |  |
| 36136 | 7A49300 | Endarterectomy of popliteal artery NEC                       |  |  |  | 1 |  |  |
| 57793 | 7A49400 | Profundoplasty femoral artery & patch repair deep fem artery |  |  |  | 1 |  |  |
| 63605 | 7A49500 | Profundoplasty and patch repair of popliteal artery          |  |  |  | 1 |  |  |
| 47835 | 7A49600 | Profundoplasty of femoral artery NEC                         |  |  |  | 1 |  |  |
| 65669 | 7A49700 | Profundoplasty of popliteal artery NEC                       |  |  |  | 1 |  |  |
| 52869 | 7A49800 | Reconstruction of femoral artery with vein graft             |  |  |  | 1 |  |  |
| 69519 | 7A49900 | Reconstruction of popliteal artery with vein graft           |  |  |  | 1 |  |  |
| 67083 | 7A49y00 | Reconstruction of femoral or popliteal artery OS             |  |  |  | 1 |  |  |
| 6617  | 7A49z00 | Reconstruction of femoral or popliteal artery NOS            |  |  |  | 1 |  |  |
| 40397 | 7A4A.00 | Other open operations on femoral artery or popliteal artery  |  |  |  | 1 |  |  |
| 60212 | 7A4A.11 | Other open operations on common femoral artery               |  |  |  | 1 |  |  |
| 20892 | 7A4A.13 | Other open operations on popliteal artery                    |  |  |  | 1 |  |  |
| 49319 | 7A4A.14 | Other open operations on superficial femoral artery          |  |  |  | 1 |  |  |
| 33555 | 7A4A000 | Repair of femoral artery NEC                                 |  |  |  | 1 |  |  |
| 28119 | 7A4A100 | Repair of popliteal artery NEC                               |  |  |  | 1 |  |  |
| 9119  | 7A4A200 | Open embolectomy of femoral artery                           |  |  |  | 1 |  |  |
| 16363 | 7A4A211 | Open thrombectomy of femoral artery                          |  |  |  | 1 |  |  |
| 17336 | 7A4A212 | Open femoral embolectomy                                     |  |  |  | 1 |  |  |
| 39437 | 7A4A300 | Open embolectomy popliteal artery                            |  |  |  | 1 |  |  |
| 42645 | 7A4A311 | Open thrombectomy of popliteal artery                        |  |  |  | 1 |  |  |
| 63368 | 7A4A700 | Repair of femoral artery with temporary silastic shunt       |  |  |  | 1 |  |  |
| 66869 | 7A4A800 | Repair of popliteal artery with temporary silastic shunt     |  |  |  | 1 |  |  |
| 24677 | 7A4Ay00 | Other open operation on femoral or popliteal artery OS       |  |  |  | 1 |  |  |

|        |         |                                                              |   |   |   |   |   |
|--------|---------|--------------------------------------------------------------|---|---|---|---|---|
| 6356   | 7A4B000 | Percutaneous transluminal angioplasty of femoral artery      |   |   | 1 |   |   |
| 29112  | 7A4B100 | Percutaneous transluminal angioplasty of popliteal artery    |   |   | 1 |   |   |
| 6256   | 7A4B200 | Percutaneous transluminal embolectomy of femoral artery      |   |   | 1 |   |   |
| 52289  | 7A4B300 | Percutaneous transluminal embolectomy of popliteal artery    |   |   | 1 |   |   |
| 71041  | 7A4B400 | Percutaneous transluminal embolisation of femoral artery     |   |   | 1 |   |   |
| 40619  | 7A4B500 | Percutaneous transluminal embolisation of popliteal artery   |   |   | 1 |   |   |
| 18030  | 7A4B800 | Percut translum thrombolysis femoral graft streptokinase     |   |   | 1 |   |   |
| 81445  | 7A4B900 | Percutaneous transluminal insertion of stent femoral artery  |   |   | 1 |   |   |
| 20657  | 7A50.00 | Revision of reconstruction of artery                         |   |   | 1 |   |   |
| 54071  | 7A50000 | Revision of reconstruction involving aorta                   |   |   | 1 |   |   |
| 49273  | 7A50100 | Revision of reconstruction involving iliac artery            |   |   | 1 |   |   |
| 18038  | 7A50200 | Revision of reconstruction involving femoral artery          |   |   | 1 |   |   |
| 65286  | 7A50300 | Revision of reconstruction of popliteal artery               |   |   | 1 |   |   |
| 12229  | G30X000 | Acute ST segment elevation myocardial infarction             | 1 |   |   | 1 |   |
| 34135  | 14A7.00 | H/O: CVA/stroke                                              |   | 1 |   |   | 1 |
| 6305   | 14A7.11 | H/O: CVA                                                     |   | 1 |   |   | 1 |
| 5871   | 14A7.12 | H/O: stroke                                                  |   | 1 |   |   | 1 |
| 66873  | 14AK.00 | H/O: Stroke in last year                                     |   | 1 |   |   | 1 |
| 100639 | 1M4..00 | Central post-stroke pain                                     |   | 1 |   |   | 1 |
| 107195 | 661M700 | Stroke self-management plan agreed                           |   | 1 |   |   | 1 |
| 109743 | 661N700 | Stroke self-management plan review                           |   | 1 |   |   | 1 |
| 105100 | 662M100 | Stroke 6 month review                                        |   | 1 |   |   | 1 |
| 18686  | 662e.00 | Stroke/CVA annual review                                     |   | 1 |   |   | 1 |
| 107886 | 662e.11 | Stroke annual review                                         |   | 1 |   |   | 1 |
| 55351  | 7P24200 | Delivery of rehabilitation for stroke                        |   | 1 |   |   | 1 |
| 56458  | 8HHM.00 | Ref to multidisciplinary stroke function improvement service |   | 1 |   |   | 1 |
| 104638 | 8IEC.00 | Ref multidisciplinary stroke function improvement declined   |   | 1 |   |   | 1 |
| 31218  | 9Om..00 | Stroke/transient ischaemic attack monitoring administration  |   | 1 |   |   | 1 |
| 28753  | 9Om0.00 | Stroke/transient ischaemic attack monitoring first letter    |   | 1 |   |   | 1 |
| 34245  | 9Om1.00 | Stroke/transient ischaemic attack monitoring second letter   |   | 1 |   |   | 1 |
| 34375  | 9Om2.00 | Stroke/transient ischaemic attack monitoring third letter    |   | 1 |   |   | 1 |
| 51465  | 9Om3.00 | Stroke/transient ischaemic attack monitoring verbal invitati |   | 1 |   |   | 1 |
| 89913  | 9Om4.00 | Stroke/transient ischaemic attack monitoring telephone invte |   | 1 |   |   | 1 |

|        |         |                                                              |   |   |  |   |
|--------|---------|--------------------------------------------------------------|---|---|--|---|
| 6228   | G68X.00 | Sequelae of stroke,not specfd as h'morrhage or infarction    |   | 1 |  | 1 |
| 110337 | Gyu6C00 | [X]Sequelae of stroke,not specfd as h'morrhage or infarction |   | 1 |  | 1 |
| 19348  | ZV12511 | [V]Personal history of stroke                                |   | 1 |  | 1 |
| 7138   | ZV12512 | [V]Personal history of cerebrovascular accident (CVA)        |   | 1 |  | 1 |
| 104505 | 662M200 | Stroke initial post discharge review                         |   | 1 |  | 1 |
| 93459  | Fyu5600 | [X]Other lacunar syndromes                                   |   | 1 |  | 1 |
| 47642  | G64z100 | Wallenberg syndrome                                          |   | 1 |  | 1 |
| 5185   | G64z111 | Lateral medullary syndrome                                   |   | 1 |  | 1 |
| 1469   | G66..00 | Stroke and cerebrovascular accident unspecified              |   | 1 |  | 1 |
| 1298   | G66..11 | CVA unspecified                                              |   | 1 |  | 1 |
| 6253   | G66..12 | Stroke unspecified                                           |   | 1 |  | 1 |
| 6116   | G66..13 | CVA - Cerebrovascular accident unspecified                   |   | 1 |  | 1 |
| 8443   | G663.00 | Brain stem stroke syndrome                                   |   | 1 |  | 1 |
| 17322  | G664.00 | Cerebellar stroke syndrome                                   |   | 1 |  | 1 |
| 33499  | G665.00 | Pure motor lacunar syndrome                                  |   | 1 |  | 1 |
| 51767  | G666.00 | Pure sensory lacunar syndrome                                |   | 1 |  | 1 |
| 7780   | G667.00 | Left sided CVA                                               |   | 1 |  | 1 |
| 12833  | G668.00 | Right sided CVA                                              |   | 1 |  | 1 |
| 47607  | L440.11 | CVA - cerebrovascular accident in the puerperium             |   | 1 |  | 1 |
| 56279  | L440.12 | Stroke in the puerperium                                     |   | 1 |  | 1 |
| 21195  | G575100 | Sudden cardiac death, so described                           | 1 |   |  |   |
| 13567  | 14AB.00 | H/O: TIA                                                     |   | 1 |  |   |
| 101251 | ZV12D00 | [V]Personal history of transient ischaemic attack            |   | 1 |  |   |
| 100015 | 8CRB.00 | Transient ischaemic attack clinical management plan          |   | 1 |  |   |
| 63746  | Fyu5500 | [X]Other transnt cerebral ischaemic attacks+related syndroms |   | 1 |  |   |
| 504    | G65..00 | Transient cerebral ischaemia                                 |   | 1 |  |   |
| 1433   | G65..12 | Transient ischaemic attack                                   |   | 1 |  |   |
| 105738 | G657.00 | Carotid territory transient ischaemic attack                 |   | 1 |  |   |
| 19354  | G65y.00 | Other transient cerebral ischaemia                           |   | 1 |  |   |
| 1895   | G65z.00 | Transient cerebral ischaemia NOS                             |   | 1 |  |   |
| 15788  | G65zz00 | Transient cerebral ischaemia NOS                             |   | 1 |  |   |
| 97001  | 44p2.00 | Cardiac troponin positive                                    | 1 |   |  | 1 |
| 29300  | 662K300 | Angina control - worsening                                   | 1 |   |  |   |

|       |         |                                                            |   |  |  |   |  |
|-------|---------|------------------------------------------------------------|---|--|--|---|--|
| 36523 | G311.00 | Preinfarction syndrome                                     | 1 |  |  | 1 |  |
| 4656  | G311.11 | Crescendo angina                                           | 1 |  |  | 1 |  |
| 39655 | G311.12 | Impending infarction                                       | 1 |  |  | 1 |  |
| 1431  | G311.13 | Unstable angina                                            | 1 |  |  | 1 |  |
| 19655 | G311.14 | Angina at rest                                             | 1 |  |  | 1 |  |
| 7347  | G311100 | Unstable angina                                            | 1 |  |  | 1 |  |
| 17307 | G311200 | Angina at rest                                             | 1 |  |  | 1 |  |
| 34328 | G311300 | Refractory angina                                          | 1 |  |  |   |  |
| 18118 | G311400 | Worsening angina                                           | 1 |  |  |   |  |
| 54251 | G311z00 | Preinfarction syndrome NOS                                 | 1 |  |  | 1 |  |
| 39449 | G312.00 | Coronary thrombosis not resulting in myocardial infarction | 1 |  |  | 1 |  |
| 9276  | G31y000 | Acute coronary insufficiency                               | 1 |  |  | 1 |  |
| 66388 | G33z000 | Status anginosus                                           | 1 |  |  | 1 |  |



## ICD10 code list for cardiovascular disease

- any\_chd: any code indicating coronary heart disease; including stable angina, percutaneous coronary intervention, coronary artery bypass graft, myocardial infarction, acute coronary syndrome, unstable angina, heart failure, sudden cardiac death, coronary thrombolysis, coronary heart disease not otherwise specified.
- any\_cvd: any code indicating cerebrovascular disease; including stroke and non-stroke cerebrovascular disease, plus procedures to repair cerebrovascular disease.
- any\_pad: any code indicating peripheral arterial disease; including peripheral arterial disease, abdominal aortic aneurysm, procedures to repair these.
- any\_acs: any code indicating unstable angina; acute coronary syndrome, myocardial infarction, coronary thrombolysis.
- any\_stroke: any code indicating ischaemic, haemorrhagic stroke or stroke not otherwise specified.

| icd   | alt_code | description                                                     | any_chd | any_cvd | any_pad | any_acs | any_stroke |
|-------|----------|-----------------------------------------------------------------|---------|---------|---------|---------|------------|
| I20   | I20      | Angina pectoris                                                 | 1       |         |         |         |            |
| I20.1 | I201     | Angina pectoris with documented spasm                           | 1       |         |         |         |            |
| I20.8 | I208     | Other forms of angina pectoris                                  | 1       |         |         |         |            |
| I20.9 | I209     | Angina pectoris, unspecified                                    | 1       |         |         |         |            |
| Z95.5 | Z955     | Presence of coronary angioplasty implant and graft              | 1       |         |         |         |            |
| I71   | I71      | Aortic aneurysm and dissection                                  |         |         | 1       |         |            |
| I71.3 | I713     | Abdominal aortic aneurysm, ruptured                             |         |         | 1       |         |            |
| I71.4 | I714     | Abdominal aortic aneurysm, without mention of rupture           |         |         | 1       |         |            |
| I71.5 | I715     | Thoracoabdominal aortic aneurysm, ruptured                      |         |         | 1       |         |            |
| I71.6 | I716     | Thoracoabdominal aortic aneurysm, without mention of rupture    |         |         | 1       |         |            |
| I71.8 | I718     | Aortic aneurysm of unspecified site, ruptured                   |         |         | 1       |         |            |
| I71.9 | I719     | Aortic aneurysm of unspecified site, without mention of rupture |         |         | 1       |         |            |
| I79.0 | I790     | Aneurysm of aorta in diseases classified elsewhere              |         |         | 1       |         |            |
| I25   | I25      | Chronic ischaemic heart disease                                 | 1       |         |         |         |            |
| I25.0 | I250     | Atherosclerotic cardiovascular disease, so described            | 1       |         |         |         |            |
| I25.1 | I251     | Atherosclerotic heart disease                                   | 1       |         |         |         |            |
| I25.3 | I253     | Aneurysm of heart                                               | 1       |         |         |         |            |
| I25.4 | I254     | Coronary artery aneurysm                                        | 1       |         |         |         |            |
| I25.5 | I255     | Ischaemic cardiomyopathy                                        | 1       |         |         |         |            |
| I25.6 | I256     | Silent myocardial ischaemia                                     | 1       |         |         |         |            |
| I25.8 | I258     | Other forms of chronic ischaemic heart disease                  | 1       |         |         |         |            |

|       |      |                                                                                                                         |   |  |  |  |   |
|-------|------|-------------------------------------------------------------------------------------------------------------------------|---|--|--|--|---|
| I25.9 | I259 | Chronic ischaemic heart disease, unspecified                                                                            | 1 |  |  |  |   |
| I11.0 | I110 | Hypertensive heart disease with (congestive) heart failure                                                              | 1 |  |  |  |   |
| I13.0 | I130 | Hypertensive heart and renal disease with (congestive) heart failure                                                    | 1 |  |  |  |   |
| I13.2 | I132 | Hypertensive heart and renal disease with both (congestive) heart failure and renal failure                             | 1 |  |  |  |   |
| I26.0 | I260 | Pulmonary embolism with mention of acute cor pulmonale                                                                  | 1 |  |  |  |   |
| I50   | I50  | Heart failure                                                                                                           | 1 |  |  |  |   |
| I50.0 | I500 | Congestive heart failure                                                                                                | 1 |  |  |  |   |
| I50.1 | I501 | Left ventricular failure                                                                                                | 1 |  |  |  |   |
| I50.9 | I509 | Heart failure, unspecified                                                                                              | 1 |  |  |  |   |
| I21   | I21  | Acute myocardial infarction                                                                                             | 1 |  |  |  | 1 |
| I21.0 | I210 | Acute transmural myocardial infarction of anterior wall                                                                 | 1 |  |  |  | 1 |
| I21.1 | I211 | Acute transmural myocardial infarction of inferior wall                                                                 | 1 |  |  |  | 1 |
| I21.2 | I212 | Acute transmural myocardial infarction of other sites                                                                   | 1 |  |  |  | 1 |
| I21.3 | I213 | Acute transmural myocardial infarction of unspecified site                                                              | 1 |  |  |  | 1 |
| I21.4 | I214 | Acute subendocardial myocardial infarction                                                                              | 1 |  |  |  | 1 |
| I21.9 | I219 | Acute myocardial infarction, unspecified                                                                                | 1 |  |  |  | 1 |
| I22   | I22  | Subsequent myocardial infarction                                                                                        | 1 |  |  |  | 1 |
| I22.0 | I220 | Subsequent myocardial infarction of anterior wall                                                                       | 1 |  |  |  | 1 |
| I22.1 | I221 | Subsequent myocardial infarction of inferior wall                                                                       | 1 |  |  |  | 1 |
| I22.8 | I228 | Subsequent myocardial infarction of other sites                                                                         | 1 |  |  |  | 1 |
| I22.9 | I229 | Subsequent myocardial infarction of unspecified site                                                                    | 1 |  |  |  | 1 |
| I23   | I23  | Certain current complications following acute myocardial infarction                                                     | 1 |  |  |  | 1 |
| I23.0 | I230 | Haemopericardium as current complication following acute myocardial infarction                                          | 1 |  |  |  | 1 |
| I23.1 | I231 | Atrial septal defect as current complication following acute myocardial infarction                                      | 1 |  |  |  | 1 |
| I23.2 | I232 | Ventricular septal defect as current complication following acute myocardial infarction                                 | 1 |  |  |  | 1 |
| I23.3 | I233 | Rupture of cardiac wall without haemopericardium as current complication following acute myocardial infarction          | 1 |  |  |  | 1 |
| I23.4 | I234 | Rupture of chordae tendinae as current complication following acute myocardial infarction                               | 1 |  |  |  | 1 |
| I23.5 | I235 | Rupture of papillary muscle as current complication following acute myocardial infarction                               | 1 |  |  |  | 1 |
| I23.6 | I236 | Thrombosis of atrium, auricular appendage, and ventricle as current complications following acute myocardial infarction | 1 |  |  |  | 1 |
| I23.8 | I238 | Other current complications following acute myocardial infarction                                                       | 1 |  |  |  | 1 |

|        |       |                                                                                      |   |   |   |   |   |
|--------|-------|--------------------------------------------------------------------------------------|---|---|---|---|---|
| I24.1  | I241  | Dressler's syndrome                                                                  | 1 |   |   | 1 |   |
| I25.2  | I252  | Old myocardial infarction                                                            | 1 |   |   | 1 |   |
| I70.2  | I702  | Atherosclerosis of arteries of extremities                                           |   |   | 1 |   |   |
| I70.20 | I7020 | Atherosclerosis of arteries of extremities                                           |   |   | 1 |   |   |
| I70.21 | I7021 | Atherosclerosis of arteries of extremities                                           |   |   | 1 |   |   |
| I73    | I73   | Other peripheral vascular diseases                                                   |   |   | 1 |   |   |
| I73.8  | I738  | Other specified peripheral vascular diseases                                         |   |   | 1 |   |   |
| I73.9  | I739  | Peripheral vascular disease, unspecified                                             |   |   | 1 |   |   |
| I79.2  | I792  | Peripheral angiopathy in diseases classified elsewhere                               |   |   | 1 |   |   |
| I63    | I63   | Cerebral infarction                                                                  |   | 1 |   |   | 1 |
| I63.0  | I630  | Cerebral infarction due to thrombosis of precerebral arteries                        |   | 1 |   |   | 1 |
| I63.1  | I631  | Cerebral infarction due to embolism of precerebral arteries                          |   | 1 |   |   | 1 |
| I63.2  | I632  | Cerebral infarction due to unspecified occlusion or stenosis of precerebral arteries |   | 1 |   |   | 1 |
| I63.3  | I633  | Cerebral infarction due to thrombosis of cerebral arteries                           |   | 1 |   |   | 1 |
| I63.4  | I634  | Cerebral infarction due to embolism of cerebral arteries                             |   | 1 |   |   | 1 |
| I63.5  | I635  | Cerebral infarction due to unspecified occlusion or stenosis of cerebral arteries    |   | 1 |   |   | 1 |
| I63.6  | I636  | Cerebral infarction due to cerebral venous thrombosis, nonpyogenic                   |   | 1 |   |   | 1 |
| I63.8  | I638  | Other cerebral infarction                                                            |   | 1 |   |   | 1 |
| I63.9  | I639  | Cerebral infarction, unspecified                                                     |   | 1 |   |   | 1 |
| I69.3  | I693  | Sequelae of cerebral infarction                                                      |   | 1 |   |   | 1 |
| I60    | I60   | Subarachnoid haemorrhage                                                             |   | 1 |   |   | 1 |
| I60.0  | I600  | Subarachnoid haemorrhage from carotid siphon and bifurcation                         |   | 1 |   |   | 1 |
| I60.1  | I601  | Subarachnoid haemorrhage from middle cerebral artery                                 |   | 1 |   |   | 1 |
| I60.2  | I602  | Subarachnoid haemorrhage from anterior communicating artery                          |   | 1 |   |   | 1 |
| I60.3  | I603  | Subarachnoid haemorrhage from posterior communicating artery                         |   | 1 |   |   | 1 |
| I60.4  | I604  | Subarachnoid haemorrhage from basilar artery                                         |   | 1 |   |   | 1 |
| I60.5  | I605  | Subarachnoid haemorrhage from vertebral artery                                       |   | 1 |   |   | 1 |
| I60.6  | I606  | Subarachnoid haemorrhage from other intracranial arteries                            |   | 1 |   |   | 1 |
| I60.7  | I607  | Subarachnoid haemorrhage from intracranial artery, unspecified                       |   | 1 |   |   | 1 |
| I60.8  | I608  | Other subarachnoid haemorrhage                                                       |   | 1 |   |   | 1 |

|       |      |                                                         |  |  |   |  |  |   |
|-------|------|---------------------------------------------------------|--|--|---|--|--|---|
| I60.9 | I609 | Subarachnoid haemorrhage, unspecified                   |  |  | 1 |  |  | 1 |
| I61   | I61  | Intracerebral haemorrhage                               |  |  | 1 |  |  | 1 |
| I61.0 | I610 | Intracerebral haemorrhage in hemisphere, subcortical    |  |  | 1 |  |  | 1 |
| I61.1 | I611 | Intracerebral haemorrhage in hemisphere, cortical       |  |  | 1 |  |  | 1 |
| I61.2 | I612 | Intracerebral haemorrhage in hemisphere, unspecified    |  |  | 1 |  |  | 1 |
| I61.3 | I613 | Intracerebral haemorrhage in brain stem                 |  |  | 1 |  |  | 1 |
| I61.4 | I614 | Intracerebral haemorrhage in cerebellum                 |  |  | 1 |  |  | 1 |
| I61.5 | I615 | Intracerebral haemorrhage, intraventricular             |  |  | 1 |  |  | 1 |
| I61.6 | I616 | Intracerebral haemorrhage, multiple localized           |  |  | 1 |  |  | 1 |
| I61.8 | I618 | Other intracerebral haemorrhage                         |  |  | 1 |  |  | 1 |
| I61.9 | I619 | Intracerebral haemorrhage, unspecified                  |  |  | 1 |  |  | 1 |
| I62   | I62  | Other nontraumatic intracranial haemorrhage             |  |  | 1 |  |  | 1 |
| I62.0 | I620 | Subdural haemorrhage (acute)(nontraumatic)              |  |  | 1 |  |  | 1 |
| I62.1 | I621 | Nontraumatic extradural haemorrhage                     |  |  | 1 |  |  | 1 |
| I62.9 | I629 | Intracranial haemorrhage (nontraumatic), unspecified    |  |  | 1 |  |  | 1 |
| I69.0 | I690 | Sequelae of subarachnoid haemorrhage                    |  |  | 1 |  |  | 1 |
| I69.1 | I691 | Sequelae of intracerebral haemorrhage                   |  |  | 1 |  |  | 1 |
| I69.2 | I692 | Sequelae of other nontraumatic intracranial haemorrhage |  |  | 1 |  |  | 1 |
| G45.0 | G450 | Vertebro-basilar artery syndrome                        |  |  | 1 |  |  |   |
| G45.1 | G451 | Carotid artery syndrome (hemispheric)                   |  |  | 1 |  |  |   |
| G45.2 | G452 | Multiple and bilateral precerebral artery syndromes     |  |  | 1 |  |  |   |
| G46   | G46  | Vascular syndromes of brain in cerebrovascular diseases |  |  | 1 |  |  |   |
| G46.0 | G460 | Middle cerebral artery syndrome                         |  |  | 1 |  |  |   |
| G46.1 | G461 | Anterior cerebral artery syndrome                       |  |  | 1 |  |  |   |
| G46.2 | G462 | Posterior cerebral artery syndrome                      |  |  | 1 |  |  |   |
| G46.3 | G463 | Brain stem stroke syndrome                              |  |  | 1 |  |  |   |
| G46.4 | G464 | Cerebellar stroke syndrome                              |  |  | 1 |  |  |   |
| G46.5 | G465 | Pure motor lacunar syndrome                             |  |  | 1 |  |  |   |
| G46.6 | G466 | Pure sensory lacunar syndrome                           |  |  | 1 |  |  |   |
| G46.7 | G467 | Other lacunar syndromes                                 |  |  | 1 |  |  |   |

|       |      |                                                                                      |   |   |  |   |
|-------|------|--------------------------------------------------------------------------------------|---|---|--|---|
| G46.8 | G468 | Other vascular syndromes of brain in cerebrovascular diseases                        |   | 1 |  |   |
| I65   | I65  | Occlusion and stenosis of precerebral arteries, not resulting in cerebral infarction |   | 1 |  |   |
| I65.0 | I650 | Occlusion and stenosis of vertebral artery                                           |   | 1 |  |   |
| I65.1 | I651 | Occlusion and stenosis of basilar artery                                             |   | 1 |  |   |
| I65.2 | I652 | Occlusion and stenosis of carotid artery                                             |   | 1 |  |   |
| I65.3 | I653 | Occlusion and stenosis of multiple and bilateral precerebral arteries                |   | 1 |  |   |
| I65.8 | I658 | Occlusion and stenosis of other precerebral artery                                   |   | 1 |  |   |
| I65.9 | I659 | Occlusion and stenosis of unspecified precerebral artery                             |   | 1 |  |   |
| I66   | I66  | Occlusion and stenosis of cerebral arteries, not resulting in cerebral infarction    |   | 1 |  |   |
| I66.0 | I660 | Occlusion and stenosis of middle cerebral artery                                     |   | 1 |  |   |
| I66.1 | I661 | Occlusion and stenosis of anterior cerebral artery                                   |   | 1 |  |   |
| I66.2 | I662 | Occlusion and stenosis of posterior cerebral artery                                  |   | 1 |  |   |
| I66.3 | I663 | Occlusion and stenosis of cerebellar arteries                                        |   | 1 |  |   |
| I66.4 | I664 | Occlusion and stenosis of multiple and bilateral cerebral arteries                   |   | 1 |  |   |
| I66.8 | I668 | Occlusion and stenosis of other cerebral artery                                      |   | 1 |  |   |
| I66.9 | I669 | Occlusion and stenosis of unspecified cerebral artery                                |   | 1 |  |   |
| I67   | I67  | Other cerebrovascular diseases                                                       |   | 1 |  |   |
| I67.2 | I672 | Cerebral atherosclerosis                                                             |   | 1 |  |   |
| I67.8 | I678 | Other specified cerebrovascular diseases                                             |   | 1 |  |   |
| I67.9 | I679 | Cerebrovascular disease, unspecified                                                 |   | 1 |  |   |
| I69   | I69  | Sequelae of cerebrovascular disease                                                  |   | 1 |  |   |
| I69.8 | I698 | Sequelae of other and unspecified cerebrovascular diseases                           |   | 1 |  |   |
| I72.5 | I725 | Aneurysm and dissection of other precerebral arteries                                |   | 1 |  |   |
| I64   | I64X | Stroke, not specified as haemorrhage or infarction                                   |   | 1 |  | 1 |
| I69.4 | I694 | Sequelae of stroke, not specified as haemorrhage or infarction                       |   | 1 |  | 1 |
| I46.1 | I461 | Sudden cardiac death, so described                                                   | 1 |   |  |   |
| G45   | G45  | Transient cerebral ischaemic attacks and related syndromes                           |   | 1 |  |   |
| G45.8 | G458 | Other transient cerebral ischaemic attacks and related syndromes                     |   | 1 |  |   |
| G45.9 | G459 | Transient cerebral ischaemic attack, unspecified                                     |   | 1 |  |   |
| I20.0 | I200 | Unstable angina                                                                      | 1 |   |  | 1 |

|       |      |                                                            |   |  |  |   |  |
|-------|------|------------------------------------------------------------|---|--|--|---|--|
| I24   | I24  | Other acute ischaemic heart diseases                       | 1 |  |  | 1 |  |
| I24.0 | I240 | Coronary thrombosis not resulting in myocardial infarction | 1 |  |  | 1 |  |
| I24.8 | I248 | Other forms of acute ischaemic heart disease               | 1 |  |  | 1 |  |
| I24.9 | I249 | Acute ischaemic heart disease, unspecified                 | 1 |  |  | 1 |  |

## OPCS code list for cardiovascular disease

- any\_chd: any code indicating coronary heart disease; including percutaneous coronary intervention, coronary artery bypass graft, coronary thrombolysis.
- any\_cvd: any code indicating stroke or procedures to repair cerebrovascular disease.
- any\_pad: any code indicating procedures to repair peripheral arterial disease or abdominal aortic aneurysm.
- any\_acs: any code indicating coronary thrombolysis.
- any\_stroke: any code indicating ischaemic, haemorrhagic stroke or stroke not otherwise specified.

| opcs_code | opcs_term                                                           | any_chd | any_cvd | any_pad | any_acs | any_stroke |
|-----------|---------------------------------------------------------------------|---------|---------|---------|---------|------------|
| L294      | Endarterectomy of carotid artery and patch repair of carotid artery |         | 1       |         |         |            |
| L295      | Endarterectomy of carotid artery NEC                                |         | 1       |         |         |            |
| L311      | Percutaneous transluminal angioplasty of carotid artery             |         | 1       |         |         |            |
| L314      | Percutaneous transluminal insertion of stent into carotid artery    |         | 1       |         |         |            |
| K40       | Saphenous vein graft replacement of coronary artery                 | 1       |         |         |         |            |
| K40.1     | Saphenous vein graft replacement of one coronary artery             | 1       |         |         |         |            |
| K40.2     | Saphenous vein graft replacement of two coronary arteries           | 1       |         |         |         |            |
| K40.3     | Saphenous vein graft replacement of three coronary arteries         | 1       |         |         |         |            |
| K40.4     | Saphenous vein graft replacement of four or more coronary arteries  | 1       |         |         |         |            |
| K40.8     | Other specified saphenous vein graft replacement of coronary artery | 1       |         |         |         |            |
| K40.9     | Unspecified saphenous vein graft replacement of coronary artery     | 1       |         |         |         |            |
| K41       | Other autograft replacement of coronary artery                      | 1       |         |         |         |            |
| K41.1     | Autograft replacement of one coronary artery NEC                    | 1       |         |         |         |            |
| K41.2     | Autograft replacement of two coronary arteries NEC                  | 1       |         |         |         |            |
| K41.3     | Autograft replacement of three coronary arteries NEC                | 1       |         |         |         |            |
| K41.4     | Autograft replacement of four or more coronary arteries NEC         | 1       |         |         |         |            |
| K41.8     | Other specified other autograft replacement of coronary artery      | 1       |         |         |         |            |
| K41.9     | Unspecified other autograft replacement of coronary artery          | 1       |         |         |         |            |
| K42       | Allograft replacement of coronary artery                            | 1       |         |         |         |            |
| K42.1     | Allograft replacement of one coronary artery                        | 1       |         |         |         |            |
| K42.2     | Allograft replacement of two coronary arteries                      | 1       |         |         |         |            |
| K42.3     | Allograft replacement of three coronary arteries                    | 1       |         |         |         |            |
| K42.4     | Allograft replacement of four or more coronary arteries             | 1       |         |         |         |            |

|       |                                                                           |   |  |  |  |  |
|-------|---------------------------------------------------------------------------|---|--|--|--|--|
| K42.8 | Other specified allograft replacement of coronary artery                  | 1 |  |  |  |  |
| K42.9 | Unspecified allograft replacement of coronary artery                      | 1 |  |  |  |  |
| K43   | Prosthetic replacement of coronary artery                                 | 1 |  |  |  |  |
| K43.1 | Prosthetic replacement of one coronary artery                             | 1 |  |  |  |  |
| K43.2 | Prosthetic replacement of two coronary arteries                           | 1 |  |  |  |  |
| K43.3 | Prosthetic replacement of three coronary arteries                         | 1 |  |  |  |  |
| K43.4 | Prosthetic replacement of four or more coronary arteries                  | 1 |  |  |  |  |
| K43.8 | Other specified prosthetic replacement of coronary artery                 | 1 |  |  |  |  |
| K43.9 | Unspecified prosthetic replacement of coronary artery                     | 1 |  |  |  |  |
| K44   | Other replacement of coronary artery                                      | 1 |  |  |  |  |
| K44.1 | Replacement of coronary arteries using multiple methods                   | 1 |  |  |  |  |
| K44.2 | Revision of replacement of coronary artery                                | 1 |  |  |  |  |
| K44.8 | Other specified other replacement of coronary artery                      | 1 |  |  |  |  |
| K44.9 | Unspecified other replacement of coronary artery                          | 1 |  |  |  |  |
| K45   | Connection of thoracic artery to coronary artery                          | 1 |  |  |  |  |
| K45.1 | Double anastomosis of mammary arteries to coronary arteries               | 1 |  |  |  |  |
| K45.2 | Double anastomosis of thoracic arteries to coronary arteries NEC          | 1 |  |  |  |  |
| K45.3 | Anastomosis of mammary artery to left anterior descending coronary artery | 1 |  |  |  |  |
| K45.4 | Anastomosis of mammary artery to coronary artery NEC                      | 1 |  |  |  |  |
| K45.5 | Anastomosis of thoracic artery to coronary artery NEC                     | 1 |  |  |  |  |
| K45.6 | Revision of connection of thoracic artery to coronary artery              | 1 |  |  |  |  |
| K45.8 | Other specified connection of thoracic artery to coronary artery          | 1 |  |  |  |  |
| K45.9 | Unspecified connection of thoracic artery to coronary artery              | 1 |  |  |  |  |
| K46   | Other bypass of coronary artery                                           | 1 |  |  |  |  |
| K46.1 | Double implantation of mammary arteries into heart                        | 1 |  |  |  |  |
| K46.2 | Double implantation of thoracic arteries into heart NEC                   | 1 |  |  |  |  |
| K46.3 | Implantation of mammary artery into heart NEC                             | 1 |  |  |  |  |
| K46.4 | Implantation of thoracic artery into heart NEC                            | 1 |  |  |  |  |
| K46.5 | Revision of implantation of thoracic artery into heart                    | 1 |  |  |  |  |
| K46.8 | Other specified other bypass of coronary artery                           | 1 |  |  |  |  |
| K46.9 | Unspecified other bypass of coronary artery                               | 1 |  |  |  |  |



|       |                                                                                                                   |   |   |   |   |
|-------|-------------------------------------------------------------------------------------------------------------------|---|---|---|---|
|       |                                                                                                                   | 1 |   |   |   |
| K47.1 | Enderectomy of coronary artery                                                                                    | 1 |   |   |   |
| K49   | Transluminal balloon angioplasty of coronary artery                                                               | 1 |   |   |   |
| K49.1 | Percutaneous transluminal balloon angioplasty of one coronary artery                                              | 1 |   |   |   |
| K49.2 | Percutaneous transluminal balloon angioplasty of multiple coronary arteries                                       | 1 |   |   |   |
| K49.3 | Percutaneous transluminal balloon angioplasty of bypass graft of coronary artery                                  | 1 |   |   |   |
| K49.4 | Percutaneous transluminal cutting balloon angioplasty of coronary artery                                          | 1 |   |   |   |
| K49.8 | Other specified transluminal balloon angioplasty of coronary artery                                               | 1 |   |   |   |
| K49.9 | Unspecified transluminal balloon angioplasty of coronary artery                                                   | 1 |   |   |   |
| K50   | Other therapeutic transluminal operations on coronary artery                                                      | 1 |   |   |   |
| K50.1 | Percutaneous transluminal laser coronary angioplasty                                                              | 1 |   |   |   |
| K50.4 | Percutaneous transluminal atherectomy of coronary artery                                                          | 1 |   |   |   |
| K50.8 | Other specified other therapeutic transluminal operations on coronary artery                                      | 1 |   |   |   |
| K50.9 | Unspecified other therapeutic transluminal operations on coronary artery                                          | 1 |   |   |   |
| K75   | Percutaneous transluminal balloon angioplasty and insertion of stent into coronary artery                         | 1 |   |   |   |
| K75.1 | Percutaneous transluminal balloon angioplasty and insertion of 1-2 drug-eluting stents into coronary artery       | 1 |   |   |   |
| K75.2 | Percutaneous transluminal balloon angioplasty and insertion of 3 or more drug-eluting stents into coronary artery | 1 |   |   |   |
| K75.3 | Percutaneous transluminal balloon angioplasty and insertion of 1-2 stents into coronary artery                    | 1 |   |   |   |
| K75.4 | Percutaneous transluminal balloon angioplasty and insertion of 3 or more stents into coronary artery NEC          | 1 |   |   |   |
| K75.8 | Other specified percutaneous transluminal balloon angioplasty and insertion of stent into coronary artery         | 1 |   |   |   |
| K75.9 | Unspecified percutaneous transluminal balloon angioplasty and insertion of stent into coronary artery             | 1 |   |   |   |
| K50.2 | Percutaneous transluminal coronary thrombolysis using streptokinase                                               | 1 |   |   | 1 |
| K50.3 | Percutaneous transluminal injection of therapeutic substance into coronary artery NEC                             | 1 |   |   | 1 |
| U54.3 | Delivery of rehabilitation for stroke                                                                             |   | 1 |   | 1 |
| L18   | Emergency replacement of aneurysmal segment of aorta                                                              |   |   | 1 |   |
| L18.4 | Emergency replacement of aneurysmal segment of infrarenal abdominal aorta by anastomosis of aorta to aorta        |   |   | 1 |   |
| L18.5 | Emergency replacement of aneurysmal segment of abdominal aorta by anastomosis of aorta to aorta NEC               |   |   | 1 |   |
| L18.8 | Other specified emergency replacement of aneurysmal segment of aorta                                              |   |   | 1 |   |
| L18.9 | Unspecified emergency replacement of aneurysmal segment of aorta                                                  |   |   | 1 |   |
| L19   | Other replacement of aneurysmal segment of aorta                                                                  |   |   | 1 |   |
| L19.3 | Replacement of aneurysmal segment of suprarenal abdominal aorta by anastomosis of aorta to aorta NEC              |   |   | 1 |   |

|       |                                                                                                      |  |  |   |  |  |
|-------|------------------------------------------------------------------------------------------------------|--|--|---|--|--|
| L19.4 | Replacement of aneurysmal segment of infrarenal abdominal aorta by anastomosis of aorta to aorta NEC |  |  | 1 |  |  |
| L19.5 | Replacement of aneurysmal segment of abdominal aorta by anastomosis of aorta to aorta NEC            |  |  | 1 |  |  |
| L19.6 | Replacement of aneurysmal bifurcation of aorta by anastomosis of aorta to iliac artery NEC           |  |  | 1 |  |  |
| L19.8 | Other specified other replacement of aneurysmal segment of aorta                                     |  |  | 1 |  |  |
| L19.9 | Unspecified other replacement of aneurysmal segment of aorta                                         |  |  | 1 |  |  |
| L20   | Other emergency bypass of segment of aorta                                                           |  |  | 1 |  |  |
| L20.3 | Emergency bypass of segment of suprarenal abdominal aorta by anastomosis of aorta to aorta NEC       |  |  | 1 |  |  |
| L20.4 | Emergency bypass of segment of infrarenal abdominal aorta by anastomosis of aorta to aorta NEC       |  |  | 1 |  |  |
| L20.5 | Emergency bypass of segment of abdominal aorta by anastomosis of aorta to aorta NEC                  |  |  | 1 |  |  |
| L20.6 | Emergency bypass of bifurcation of aorta by anastomosis of aorta to iliac artery NEC                 |  |  | 1 |  |  |
| L22.2 | Revision of prosthesis of bifurcation of aorta                                                       |  |  | 1 |  |  |
| L22.3 | Revision of prosthesis of abdominal aorta NEC                                                        |  |  | 1 |  |  |
| L22.4 | Removal of prosthesis from aorta                                                                     |  |  | 1 |  |  |
| L23.5 | Revision of plastic repair of aorta                                                                  |  |  | 1 |  |  |
| L25.4 | Operations on aneurysm of aorta NEC                                                                  |  |  | 1 |  |  |
| L27   | Transluminal insertion of stent graft for aneurysmal segment of aorta                                |  |  | 1 |  |  |
| L27.1 | Endovascular insertion of stent graft for infrarenal abdominal aortic aneurysm                       |  |  | 1 |  |  |
| L27.2 | Endovascular insertion of stent graft for suprarenal aortic aneurysm                                 |  |  | 1 |  |  |
| L27.5 | Endovascular insertion of stent graft for aortic aneurysm of bifurcation NEC                         |  |  | 1 |  |  |
| L27.6 | Endovascular insertion of stent graft for aorto-uniiliac aneurysm                                    |  |  | 1 |  |  |
| L27.8 | Other specified transluminal insertion of stent graft for aneurysmal segment of aorta                |  |  | 1 |  |  |
| L27.9 | Unspecified transluminal insertion of stent graft for aneurysmal segment of aorta                    |  |  | 1 |  |  |
| L28   | Transluminal operations on aneurysmal segment of aorta                                               |  |  | 1 |  |  |
| L28.1 | Endovascular insertion of stent for infrarenal abdominal aortic aneurysm                             |  |  | 1 |  |  |
| L28.2 | Endovascular insertion of stent for suprarenal aortic aneurysm                                       |  |  | 1 |  |  |
| L28.5 | Endovascular insertion of stent for aortic aneurysm of bifurcation NEC                               |  |  | 1 |  |  |
| L28.6 | Endovascular insertion of stent for aorto-uniiliac aneurysm                                          |  |  | 1 |  |  |
| L50   | Other emergency bypass of iliac artery                                                               |  |  | 1 |  |  |
| L50.1 | Emergency bypass of common iliac artery by anastomosis of aorta to common iliac artery NEC           |  |  | 1 |  |  |
| L50.2 | Emergency bypass of iliac artery by anastomosis of aorta to external iliac artery NEC                |  |  | 1 |  |  |
| L50.3 | Emergency bypass of artery of leg by anastomosis of aorta to common femoral artery NEC               |  |  | 1 |  |  |

|       |                                                                                                              |  |  |   |  |  |
|-------|--------------------------------------------------------------------------------------------------------------|--|--|---|--|--|
| L50.4 | Emergency bypass of artery of leg by anastomosis of aorta to deep femoral artery NEC                         |  |  | 1 |  |  |
| L50.5 | Emergency bypass of iliac artery by anastomosis of iliac artery to iliac artery NEC                          |  |  | 1 |  |  |
| L50.6 | Emergency bypass of artery of leg by anastomosis of iliac artery to femoral artery NEC                       |  |  | 1 |  |  |
| L50.8 | Other specified other emergency bypass of iliac artery                                                       |  |  | 1 |  |  |
| L50.9 | Unspecified other emergency bypass of iliac artery                                                           |  |  | 1 |  |  |
| L51   | Other bypass of iliac artery                                                                                 |  |  | 1 |  |  |
| L51.1 | Bypass of common iliac artery by anastomosis of aorta to common iliac artery NEC                             |  |  | 1 |  |  |
| L51.2 | Bypass of iliac artery by anastomosis of aorta to external iliac artery NEC                                  |  |  | 1 |  |  |
| L51.3 | Bypass of artery of leg by anastomosis of aorta to common femoral artery NEC                                 |  |  | 1 |  |  |
| L51.4 | Bypass of artery of leg by anastomosis of aorta to deep femoral artery NEC                                   |  |  | 1 |  |  |
| L51.5 | Bypass of iliac artery by anastomosis of iliac artery to iliac artery NEC                                    |  |  | 1 |  |  |
| L51.6 | Bypass of artery of leg by anastomosis of iliac artery to femoral artery NEC                                 |  |  | 1 |  |  |
| L51.8 | Other specified other bypass of iliac artery                                                                 |  |  | 1 |  |  |
| L51.9 | Unspecified other bypass of iliac artery                                                                     |  |  | 1 |  |  |
| L52   | Reconstruction of iliac artery                                                                               |  |  | 1 |  |  |
| L52.1 | Endarterectomy of iliac artery and patch repair of iliac artery                                              |  |  | 1 |  |  |
| L52.2 | Endarterectomy of iliac artery NEC                                                                           |  |  | 1 |  |  |
| L52.8 | Other specified reconstruction of iliac artery                                                               |  |  | 1 |  |  |
| L52.9 | Unspecified reconstruction of iliac artery                                                                   |  |  | 1 |  |  |
| L53   | Other open operations on iliac artery                                                                        |  |  | 1 |  |  |
| L53.1 | Repair of iliac artery NEC                                                                                   |  |  | 1 |  |  |
| L53.2 | Open embolectomy of iliac artery                                                                             |  |  | 1 |  |  |
| L54.1 | Percutaneous transluminal angioplasty of iliac artery                                                        |  |  | 1 |  |  |
| L54.2 | Percutaneous transluminal embolectomy of iliac artery                                                        |  |  | 1 |  |  |
| L54.4 | Percutaneous transluminal insertion of stent into iliac artery                                               |  |  | 1 |  |  |
| L54.8 | Other specified transluminal operations on iliac artery                                                      |  |  | 1 |  |  |
| L54.9 | Unspecified transluminal operations on iliac artery                                                          |  |  | 1 |  |  |
| L58   | Other emergency bypass of femoral artery                                                                     |  |  | 1 |  |  |
| L58.1 | Emergency bypass of femoral artery by anastomosis of femoral artery to femoral artery NEC                    |  |  | 1 |  |  |
| L58.2 | Emergency bypass of femoral artery by anastomosis of femoral artery to popliteal artery using prosthesis NEC |  |  | 1 |  |  |
| L58.3 | Emergency bypass of femoral artery by anastomosis of femoral artery to popliteal artery using vein graft NEC |  |  | 1 |  |  |

|       |                                                                                                             |  |  |   |  |  |
|-------|-------------------------------------------------------------------------------------------------------------|--|--|---|--|--|
| L58.4 | Emergency bypass of femoral artery by anastomosis of femoral artery to tibial artery using prosthesis NEC   |  |  | 1 |  |  |
| L58.5 | Emergency bypass of femoral artery by anastomosis of femoral artery to tibial artery using vein graft NEC   |  |  | 1 |  |  |
| L58.6 | Emergency bypass of femoral artery by anastomosis of femoral artery to peroneal artery using prosthesis NEC |  |  | 1 |  |  |
| L58.7 | Emergency bypass of femoral artery by anastomosis of femoral artery to peroneal artery using vein graft NEC |  |  | 1 |  |  |
| L58.8 | Other specified other emergency bypass of femoral artery                                                    |  |  | 1 |  |  |
| L58.9 | Unspecified other emergency bypass of femoral artery                                                        |  |  | 1 |  |  |
| L59   | Other bypass of femoral artery                                                                              |  |  | 1 |  |  |
| L59.1 | Bypass of femoral artery by anastomosis of femoral artery to femoral artery NEC                             |  |  | 1 |  |  |
| L59.2 | Bypass of femoral artery by anastomosis of femoral artery to popliteal artery using prosthesis NEC          |  |  | 1 |  |  |
| L59.3 | Bypass of femoral artery by anastomosis of femoral artery to popliteal artery using vein graft NEC          |  |  | 1 |  |  |
| L59.4 | Bypass of femoral artery by anastomosis of femoral artery to tibial artery using prosthesis NEC             |  |  | 1 |  |  |
| L59.5 | Bypass of femoral artery by anastomosis of femoral artery to tibial artery using vein graft NEC             |  |  | 1 |  |  |
| L59.6 | Bypass of femoral artery by anastomosis of femoral artery to peroneal artery using prosthesis NEC           |  |  | 1 |  |  |
| L59.7 | Bypass of femoral artery by anastomosis of femoral artery to peroneal artery using vein graft NEC           |  |  | 1 |  |  |
| L59.8 | Other specified other bypass of femoral artery                                                              |  |  | 1 |  |  |
| L59.9 | Unspecified other bypass of femoral artery                                                                  |  |  | 1 |  |  |
| L60   | Reconstruction of femoral artery                                                                            |  |  | 1 |  |  |
| L60.1 | Endarterectomy of femoral artery and patch repair of femoral artery                                         |  |  | 1 |  |  |
| L60.2 | Endarterectomy of femoral artery NEC                                                                        |  |  | 1 |  |  |
| L60.3 | Profundoplasty of femoral artery and patch repair of deep femoral artery                                    |  |  | 1 |  |  |
| L60.4 | Profundoplasty of femoral artery NEC                                                                        |  |  | 1 |  |  |
| L60.8 | Other specified reconstruction of femoral artery                                                            |  |  | 1 |  |  |
| L60.9 | Unspecified reconstruction of femoral artery                                                                |  |  | 1 |  |  |
| L62   | Other open operations on femoral artery                                                                     |  |  | 1 |  |  |
| L62.1 | Repair of femoral artery NEC                                                                                |  |  | 1 |  |  |
| L62.2 | Open embolectomy of femoral artery                                                                          |  |  | 1 |  |  |
| L62.8 | Other specified other open operations on femoral artery                                                     |  |  | 1 |  |  |
| L62.9 | Unspecified other open operations on femoral artery                                                         |  |  | 1 |  |  |
| L63.1 | Percutaneous transluminal angioplasty of femoral artery                                                     |  |  | 1 |  |  |
| L63.2 | Percutaneous transluminal embolectomy of femoral artery                                                     |  |  | 1 |  |  |
| L63.3 | Percutaneous transluminal embolisation of femoral artery                                                    |  |  | 1 |  |  |

|       |                                                                                                                    |   |   |   |  |  |
|-------|--------------------------------------------------------------------------------------------------------------------|---|---|---|--|--|
| L63.5 | Percutaneous transluminal insertion of stent into femoral artery                                                   |   |   | 1 |  |  |
| L65   | Revision of reconstruction of artery                                                                               |   |   | 1 |  |  |
| L65.1 | Revision of reconstruction involving aorta                                                                         |   |   | 1 |  |  |
| L65.2 | Revision of reconstruction involving iliac artery                                                                  |   |   | 1 |  |  |
| L65.3 | Revision of reconstruction involving femoral artery                                                                |   |   | 1 |  |  |
| K48.3 | Open angioplasty of coronary artery                                                                                | 1 |   |   |  |  |
| L97.2 | Peroperative angioplasty                                                                                           | 1 |   |   |  |  |
| L29.4 | Endarterectomy of carotid artery and patch repair of carotid artery                                                |   | 1 |   |  |  |
| L29.5 | Endarterectomy of carotid artery NEC                                                                               |   | 1 |   |  |  |
| L29.6 | High-flow interposition extracranial to intracranial bypass from external carotid artery to middle cerebral artery |   | 1 |   |  |  |
| L29.7 | Bypass of carotid artery by anastomosis of superficial temporal artery to middle cerebral artery                   |   | 1 |   |  |  |
| L31.1 | Percutaneous transluminal angioplasty of carotid artery                                                            |   | 1 |   |  |  |
| L31.4 | Percutaneous transluminal insertion of stent into carotid artery                                                   |   | 1 |   |  |  |
| L35.3 | Percutaneous transluminal insertion of stent into cerebral artery                                                  |   | 1 |   |  |  |
| L37.2 | Endarterectomy of vertebral artery                                                                                 |   | 1 |   |  |  |

## Target organ damage Read codes

### Chronic kidney disease

| medcode | readcode | readterm                                                     |
|---------|----------|--------------------------------------------------------------|
| 12479   | 1Z13.00  | Chronic kidney disease stage 4                               |
| 12566   | 1Z12.00  | Chronic kidney disease stage 3                               |
| 12585   | 1Z14.00  | Chronic kidney disease stage 5                               |
| 12586   | 1Z11.00  | Chronic kidney disease stage 2                               |
| 12860   | 9hE0.00  | Except chronic kidney disease qual indic: Patient unsuitable |
| 19473   | 66i..00  | Chronic kidney disease monitoring                            |
| 29013   | 1Z10.00  | Chronic kidney disease stage 1                               |
| 30735   | 6AA..00  | Chronic kidney disease annual review                         |
| 30739   | 9Ot0.00  | Chronic kidney disease monitoring first letter               |
| 40100   | 9hE1.00  | Exc chronic kidney disease quality indicators: Inform dissen |
| 46626   | 9hE..00  | Exception reporting: chronic kidney disease quality indicato |
| 69679   | 9Ot4.00  | Chronic kidney disease monitoring telephone invite           |
| 71271   | 9Ot..00  | Chronic kidney disease monitoring administration             |
| 72962   | 9Ot1.00  | Chronic kidney disease monitoring second letter              |
| 72964   | 9Ot2.00  | Chronic kidney disease monitoring third letter               |
| 88494   | 9Ot3.00  | Chronic kidney disease monitoring verbal invite              |
| 89332   | 9Ot5.00  | Predicted stage chronic kidney disease                       |
| 94789   | 1Z17.00  | Chronic kidney disease stage 1 with proteinuria              |
| 94793   | 1Z1B.00  | Chronic kidney disease stage 3 with proteinuria              |
| 94965   | 1Z15.00  | Chronic kidney disease stage 3A                              |
| 95121   | 1Z1A.00  | Chronic kidney disease stage 2 without proteinuria           |
| 95122   | 1Z1H.00  | Chronic kidney disease stage 4 with proteinuria              |
| 95123   | 1Z1C.00  | Chronic kidney disease stage 3 without proteinuria           |
| 95145   | 1Z1B.11  | CKD stage 3 with proteinuria                                 |
| 95146   | 1Z19.00  | Chronic kidney disease stage 2 with proteinuria              |
| 95175   | 1Z1E.00  | Chronic kidney disease stage 3A without proteinuria          |
| 95176   | 1Z1E.11  | CKD stage 3A without proteinuria                             |
| 95177   | 1Z1G.00  | Chronic kidney disease stage 3B without proteinuria          |
| 95178   | 1Z1F.00  | Chronic kidney disease stage 3B with proteinuria             |
| 95179   | 1Z16.00  | Chronic kidney disease stage 3B                              |
| 95180   | 1Z1F.11  | CKD stage 3B with proteinuria                                |
| 95188   | 1Z1C.11  | CKD stage 3 without proteinuria                              |
| 95405   | 1Z1L.00  | Chronic kidney disease stage 5 without proteinuria           |
| 95406   | 1Z1J.00  | Chronic kidney disease stage 4 without proteinuria           |
| 95408   | 1Z1D.00  | Chronic kidney disease stage 3A with proteinuria             |
| 95422   | 9Ni9.00  | Did not attend chronic kidney disease monitoring clinic      |
| 95508   | 1Z1K.00  | Chronic kidney disease stage 5 with proteinuria              |
| 95571   | 1Z1D.11  | CKD stage 3A with proteinuria                                |
| 95572   | 1Z18.00  | Chronic kidney disease stage 1 without proteinuria           |
| 97587   | 1Z1J.11  | CKD stage 4 without proteinuria                              |
| 97683   | 1Z1L.11  | CKD stage 5 without proteinuria                              |
| 97978   | 1Z1A.11  | CKD stage 2 without proteinuria                              |
| 97979   | 1Z19.11  | CKD stage 2 with proteinuria                                 |
| 97980   | 1Z17.11  | CKD stage 1 with proteinuria                                 |
| 99160   | 1Z1K.11  | CKD stage 5 with proteinuria                                 |

|        |         |                                                     |
|--------|---------|-----------------------------------------------------|
| 99312  | 1Z1H.11 | CKD stage 4 with proteinuria                        |
| 99813  | 14OY.00 | At risk of chronic kidney disease                   |
| 100633 | 1Z1G.11 | CKD stage 3B without proteinuria                    |
| 104619 | K053.00 | Chronic kidney disease stage 3                      |
| 104963 | K054.00 | Chronic kidney disease stage 4                      |
| 104981 | K05..13 | Chronic kidney disease                              |
| 105009 | 68D1.11 | Chronic kidney disease screening                    |
| 105151 | K055.00 | Chronic kidney disease stage 5                      |
| 105383 | K052.00 | Chronic kidney disease stage 2                      |
| 105392 | K051.00 | Chronic kidney disease stage 1                      |
| 108766 | 661M200 | Chronic kidney disease self-management plan agreed  |
| 109657 | 1Z1Y.00 | CKD with GFR category G3b & albuminuria category A2 |
| 109804 | 1Z1T.00 | CKD with GFR category G3a & albuminuria category A1 |
| 109805 | 1Z1V.00 | CKD with GFR category G3a & albuminuria category A2 |
| 109904 | 1Z1b.00 | CKD with GFR category G4 & albuminuria category A2  |
| 109905 | 1Z1W.00 | CKD with GFR category G3a & albuminuria category A3 |
| 109963 | 1Z1X.00 | CKD with GFR category G3b & albuminuria category A1 |
| 109980 | 1Z1a.00 | CKD with GFR category G4 & albuminuria category A1  |
| 109981 | 1Z1e.00 | CKD with GFR category G5 & albuminuria category A2  |
| 109990 | 1Z1Z.00 | CKD with GFR category G3b & albuminuria category A3 |
| 110003 | 1Z1N.00 | CKD with GFR category G1 & albuminuria category A2  |
| 110033 | 1Z1M.00 | CKD with GFR category G1 & albuminuria category A1  |
| 110108 | 1Z1R.00 | CKD with GFR category G2 & albuminuria category A2  |
| 110133 | 1Z1d.00 | CKD with GFR category G5 & albuminuria category A1  |
| 110251 | 1Z1S.00 | CKD with GFR category G2 & albuminuria category A3  |
| 110269 | 1Z1Q.00 | CKD with GFR category G2 & albuminuria category A1  |
| 110467 | 1Z1f.00 | CKD with GFR category G5 & albuminuria category A3  |
| 110484 | 1Z1P.00 | CKD with GFR category G1 & albuminuria category A3  |
| 110626 | 1Z1c.00 | CKD with GFR category G4 & albuminuria category A3  |
| 111022 | 1Z18.11 | CKD stage 1 without proteinuria                     |

## Proteinuria

| medcode | readcode | readterm                                                                                          |
|---------|----------|---------------------------------------------------------------------------------------------------|
| 1802    | 4678     | Proteinuria                                                                                       |
| 13600   | 4677     | Urine protein test = ++++                                                                         |
| 13611   | 4675     | Urine protein test = ++                                                                           |
| 13613   | 46N2.00  | Urine protein abnormal                                                                            |
| 13621   | 4676     | Urine protein test = +++                                                                          |
| 14901   | K136.00  | Benign postural proteinuria                                                                       |
| 16465   | K190X00  | Persistent proteinuria, unspecified                                                               |
| 26054   | C10FL00  | Type 2 diabetes mellitus with persistent proteinuria                                              |
| 30323   | C10EK00  | Type 1 diabetes mellitus with persistent proteinuria                                              |
| 36243   | K136.11  | Orthostatic proteinuria                                                                           |
| 43611   | K0A4.00  | Isolated proteinuria with specified morphological lesion                                          |
| 44804   | K0A4100  | Isolated proteinuria/specified morphological lesion focal+segmental glomerular lesion             |
| 59992   | K0A4W00  | Isolated proteinuria, with unspecified morphological changes                                      |
| 60796   | C10FL11  | Type II diabetes mellitus with persistent proteinuria                                             |
| 61470   | 66A1.00  | Diabetic monitoring - higher risk albumin excretion                                               |
| 61811   | K0A4500  | Isolated proteinuria/specified morphological lesion of mesangiocapillary glomerulonephritis       |
| 64030   | Kyu5G00  | [X]Persistent proteinuria, unspecified                                                            |
| 66475   | 66Ak.00  | Diabetic monitoring - lower risk albumin excretion                                                |
| 66613   | K0A4300  | Isolated proteinuria/specified morphological lesion of mesangial proliferative glomerulonephritis |
| 71964   | K0A4200  | Isolated proteinuria/specified morphological lesion of membranous glomerulonephritis              |
| 94789   | I217.00  | Chronic kidney disease stage 1 with proteinuria                                                   |
| 94793   | I21B.00  | Chronic kidney disease stage 3 with proteinuria                                                   |
| 95122   | I21H.00  | Chronic kidney disease stage 4 with proteinuria                                                   |
| 95145   | I21B.11  | CKD stage 3 with proteinuria                                                                      |
| 95146   | I219.00  | Chronic kidney disease stage 2 with proteinuria                                                   |
| 95178   | I21F.00  | Chronic kidney disease stage 3B with proteinuria                                                  |
| 95180   | I21F.11  | CKD stage 3B with proteinuria                                                                     |
| 95408   | I21D.00  | Chronic kidney disease stage 3A with proteinuria                                                  |
| 95508   | I21K.00  | Chronic kidney disease stage 5 with proteinuria                                                   |
| 95571   | I21D.11  | CKD stage 3A with proteinuria                                                                     |
| 97979   | I219.11  | CKD stage 2 with proteinuria                                                                      |
| 97980   | I217.11  | CKD stage 1 with proteinuria                                                                      |
| 99160   | I21K.11  | CKD stage 5 with proteinuria                                                                      |
| 99312   | I21H.11  | CKD stage 4 with proteinuria                                                                      |
| 101572  | K0A4X00  | Isolated proteinuria, with other specified morphological changes                                  |
| 105302  | K08yA00  | Proteinuric diabetic nephropathy                                                                  |
| 109657  | I21Y.00  | CKD with GFR category G3b & albuminuria category A2                                               |
| 109805  | I21V.00  | CKD with GFR category G3a & albuminuria category A2                                               |
| 109904  | I21b.00  | CKD with GFR category G4 & albuminuria category A2                                                |
| 109905  | I21W.00  | CKD with GFR category G3a & albuminuria category A3                                               |
| 109981  | I21e.00  | CKD with GFR category G5 & albuminuria category A2                                                |
| 109990  | I21Z.00  | CKD with GFR category G3b & albuminuria category A3                                               |
| 110003  | I21N.00  | CKD with GFR category G1 & albuminuria category A2                                                |
| 110108  | I21R.00  | CKD with GFR category G2 & albuminuria category A2                                                |
| 110251  | I21S.00  | CKD with GFR category G2 & albuminuria category A3                                                |
| 110467  | I21f.00  | CKD with GFR category G5 & albuminuria category A3                                                |
| 110484  | I21P.00  | CKD with GFR category G1 & albuminuria category A3                                                |
| 110626  | I21c.00  | CKD with GFR category G4 & albuminuria category A3                                                |



Hypertensive Retinopathy

| Medcode | Read term                | Read code |
|---------|--------------------------|-----------|
| 6702    | Hypertensive retinopathy | F421300   |

Left ventricular hypertrophy

| medcode | readcode | readterm                       |
|---------|----------|--------------------------------|
| 562     | G5y3411  | Left ventricular hypertrophy   |
| 2724    | G5y3400  | Ventricular hypertrophy        |
| 6319    | 324..00  | ECG:left ventricle hypertrophy |
| 13857   | 3242     | ECG: shows LVH                 |
| 23142   | 324Z.00  | ECG: LVH NOS                   |
| 61124   | G5y3500  | Cardiac hypertrophy NOS        |
| 64242   | 2492     | O/E - apex beat displaced -LVH |

## PROTOCOL INFORMATION REQUIRED

The following sections below **must** be included in the CPRD ISAC research protocol. Please refer to the guidance on 'Contents of CPRD ISAC Research Protocols' ([www.cprd.com/isac](http://www.cprd.com/isac)) for more information on how to complete the sections below. Pages should be numbered. All abbreviations must be defined on first use.

**Applicants must complete all sections listed below**  
**Sections which do not apply should be completed as 'Not Applicable'**

### **A. Study Title<sup>§</sup>**

*§Please note: This information will be published on CPRD's website as part of its transparency policy*

Eligibility for blood pressure lowering treatment and subsequent cardiovascular disease burden under four different treatment approaches: a cohort study

### **B. Lay Summary (Max. 200 words)<sup>§</sup>**

*§Please note: This information will be published on CPRD's website as part of its transparency policy*

Blood pressure lowering drugs are extremely effective in reducing heart attacks and strokes. In the UK, only patients whose blood pressures are above a certain threshold are considered for treatment. However, recent research studies have shown that even patients with blood pressures below that threshold might benefit from treatment and therefore the current approach may not be the best way to save lives.

Other possible approaches to blood pressure lowering treatment include treating based on a patient's age and sex (e.g. treat men >55 and women >65 years), or treating based on a patient's overall cardiovascular disease risk, which takes into account other factors like diabetes, smoking and older age. This approach is used for deciding who should be offered statins.

This research aims to provide information to help decide which of four proposed strategies for recommending blood pressure treatment is best for population health. In particular, we will analyse primary care and linked hospital records from CPRD to first work out the number of patients who would be eligible for treatment under each suggested approach, and second, to look at which strategy prioritises treatment to patients who go on to experience heart attacks and strokes.

### **C. Technical Summary (Max. 200 words)<sup>§</sup>**

*§Please note: This information will be published on CPRD's website as part of its transparency policy*

The current approach to blood pressure treatment in the UK relies predominantly on blood pressure thresholds. This ignores evidence showing that treatment lowers cardiovascular disease (CVD) risk at all blood pressures, with no threshold. One alternative treatment approach would be to use a threshold of overall CVD risk, a strategy that is now accepted for lipid lowering drugs. Another suggested approach is to use age and sex to determine treatment.

To help decide on the optimal strategy for population health, there are two key considerations: the number of patients who would be eligible for treatment under each strategy, and whether the strategy prioritises treatment to patients

**Applicants must complete all sections listed below**

**Sections which do not apply should be completed as 'Not Applicable'**

with the highest future burden of CVD. This protocol describes a cohort study to investigate eligibility for blood pressure lowering treatment under four different approaches (i) current NICE guideline, (ii) blood pressure alone (to reflect evidence that some GPs are ignoring the NICE guideline), (iii) cardiovascular risk, and (iv) age/sex. Beginning in 2011, the cohort will be split according to treatment eligibility under each strategy, and followed up for their first cardiovascular disease event. Rates and proportions of events, according to treatment eligibility, will be reported.

**D. Objectives, Specific Aims and Rationale**

The overall objective is to describe and compare eligibility for blood pressure lowering treatment under four different approaches, and relate this to subsequent cardiovascular disease burden among eligible and ineligible patients.

*Specific aims are:*

Among a cohort of CPRD patients:

1. To use baseline data to determine patients' treatment eligibility based on four different approaches to blood pressure lowering treatment: (i) blood pressure alone, (ii) current NICE guidelines, (iii) QRISK2 score, and (iv) age and sex.
2. To describe the rate and proportion of cardiovascular disease events that occur during follow-up in patients eligible and ineligible for treatment under each of the four approaches.
3. To describe the rate and proportion of cardiovascular disease events that occur during follow-up in patients grouped according to their blood pressure, overall cardiovascular disease risk, and age and sex.

*Rationale*

To help decide which blood pressure treatment strategy is optimal for population health, this study will address two key considerations: the number of patients who would be eligible for treatment under each strategy, and whether the strategy prioritises treatment to patients with the highest future burden of CVD. In addition to the focus on treatment eligibility, this study will also investigate the ability of *different levels* of blood pressure alone, *different levels* of overall cardiovascular disease risk, and *different age groups* to discriminate between patients who will and won't have cardiovascular disease events in the future.

**E. Study Background**

**The current approach to blood pressure treatment**

High blood pressure is the most common, modifiable risk factor for cardiovascular disease (CVD).[1] Randomised trials have shown that blood pressure reductions, whether by diet, lifestyle or drug therapy, reduce the risk of CVD.[2, 3] Guidance from the National Institute for Health and Care Excellence (NICE) recommends that clinicians consider pharmacological intervention for primary prevention of CVD when clinic blood pressure is  $\geq 140/90$  mm Hg, confirmed by ambulatory monitoring ('hypertension') **and** ten year cardiovascular disease risk is at least 20%, or if blood pressure is  $>160/100$ mmHg.[4]

However, the use of a blood pressure threshold to determine eligibility for treatment may be suboptimal for two reasons. Firstly, there is strong evidence for a continuous, log-linear association between blood pressure and CVD risk between 110/70 and 170/105 mm Hg with no evidence of a threshold.[5, 6] Furthermore, meta-analyses of randomised and non-randomised studies showed that treating blood pressures across this whole range reduces CVD risk.[2, 7] Secondly, the use of a blood pressure threshold to determine treatment ignores overall or 'absolute' CVD risk, which is strongly influenced by other CVD risk factors. For example, a patient with a systolic pressure of 160 mm Hg could have a five year absolute risk as low as 2% if no other risk factors are present, and would qualify for treatment under the current approach, but a patient with a systolic pressure of 130 mm Hg could have a risk as high as 35% and would not qualify.[8]

**Using absolute CVD risk to guide treatment**

Since the aim of blood pressure lowering treatment is to reduce CVD risk, a rational alternative strategy would be to treat those with highest risk, rather than only those with 'hypertension'. Such a strategy would involve using a

**Applicants must complete all sections listed below**

**Sections which do not apply should be completed as 'Not Applicable'**

validated CVD risk score (such as QRISK2,[9] or QRISK3,[10] calculated based on blood pressure and other risk factors) to determine treatment. CVD prevention based on absolute CVD risk rather than on a single risk factor threshold is now accepted for lipid lowering drugs, but has not been widely accepted for blood pressure.

Guidelines in New Zealand already recommend an absolute CVD risk-based approach to blood pressure lowering treatment. Additionally there is a growing body of international evidence that a risk-based approach may be superior to a blood pressure threshold-based approach in terms of CVD prevention.[11-14] Studies have also demonstrated that a risk-based approach is cost effective; projected savings in an Australian study were over \$5.4 billion AUD.[13, 15] This could equate to similar savings in the UK in terms of NHS cost and could allow redistribution of healthcare resources towards populations with greatest need.

**Other approaches to guide treatment**

Prior to 2011, NICE guidance used simple blood pressure thresholds alone to determine treatment. The 2011 guideline still categorises patients with blood pressures below 140/90mm Hg as ineligible for treatment. However, patients with blood pressures between 140/90 and 160/100mm Hg were made eligible for treatment only if they have an absolute risk of CVD of  $\geq 20\%$ , or they have diabetes, kidney disease, or target organ damage. Despite this updated guideline, there is some evidence to suggest that GPs ignore the component of risk and continue to use simple cut offs to guide treatment decisions.[16]

Another suggested approach to blood pressure lowering treatment is to base decisions on age and sex (e.g. all men over 55, all women over 65[17]). This approach reflects the high underlying risk of CVD amongst older age groups, but is much simpler than using QRISK2 as only age and sex are required to make a judgement about treatment.

**Determining the best approach**

Two key considerations in determining the optimal approach to blood pressure lowering treatment are (i) the number of patients eligible for treatment under each approach, and (ii) which approach prioritises treatment to the group of patients who are most likely to experience a CVD event. Therefore, the objective of this study is to describe and compare eligibility for blood pressure lowering treatment under four different approaches, and relate this to subsequent cardiovascular disease burden among eligible and ineligible patients.

**F. Study Type**

Descriptive

**G. Study Design**

An open cohort of patients without cardiovascular disease event will be created. Patient records will be reviewed to establish their blood pressure, age, sex, other cardiovascular risk factors and predicted absolute CVD risk. Patients in the cohort will be categorised as eligible or ineligible for treatment under four different approaches: (i) blood pressure alone, (ii) current NICE guidelines for blood pressure treatment, (iii) QRISK2 absolute disease risk, and (iv) age and sex. Patients will then be followed until the earliest of a CVD event (the outcome), death, or end of CPRD follow-up.

A cohort has been chosen in order to capture the distribution of blood pressure and overall cardiovascular disease risk at baseline, and to use these categorisations to observe the rate of CVD events during follow-up.

**Applicants must complete all sections listed below**  
**Sections which do not apply should be completed as 'Not Applicable'**

**H. Feasibility counts**

In a previous study examining a cohort of patients in the CPRD without existing cardiovascular disease, 1.25 million patients were included and one fifth of these were using blood pressure lowering treatment. Five year follow up yielded over 80,000 CVD diagnoses.[18] Pilot data for the present study, later than the previous study and using fewer linked sources, estimated a rate of 6.2 CVD events per 1000 person years, and a conservative estimate of 23,000 events (based on a more restricted set of acute CVD outcomes). Therefore, the feasibility counts have been calculated based on this very conservative event rate.

Feasibility counts have been carried out to estimate the likely number of events over five year follow up. These are shown in the table below. Our pilot data show that across all strategies, the minimum proportion of eligible patients (i.e. the most prudent treatment strategy) is likely to be 20%. Predicted confidence intervals have been calculated for the most prudent treatment strategy, and within subgroups of that treatment strategy. This includes the secondary analyses investigating blood pressure lowering treatment use, age 80+ vs <80, and statin use.

|                                                                                                                            | <b>Estimated<br/>N patients<br/>in cohort</b> | <b>Expected N<br/>events<br/>during<br/>follow-up<sup>§</sup></b> | <b>Expected %<br/>events in<br/>subgroup</b> | <b>Expected 95%<br/>confidence<br/>interval</b> |
|----------------------------------------------------------------------------------------------------------------------------|-----------------------------------------------|-------------------------------------------------------------------|----------------------------------------------|-------------------------------------------------|
| Total patients without CVD at cohort entry                                                                                 | 1,250,000                                     | 23,250                                                            | -                                            |                                                 |
| Minimum number eligible under the most prudent treatment strategy                                                          | 250,000                                       | 4,650                                                             | 20.0                                         | (18.9-21.1)                                     |
| <b>Stratification for secondary analyses - minimum numbers expected under most prudent treatment strategy (N=250,000):</b> |                                               |                                                                   |                                              |                                                 |
| On blood pressure lowering treatment*                                                                                      | 50,000                                        | 930                                                               | 4.0                                          | (2.7-5.3)                                       |
| Not on blood pressure lowering treatment                                                                                   | 200,000                                       | 3,720                                                             | 16.0                                         | (14.8-17.2)                                     |
| Age 80+**                                                                                                                  | 12,500                                        | 233                                                               | 1.0                                          | (-0.3-2.3)                                      |
| Age <80                                                                                                                    | 237,500                                       | 4,418                                                             | 19.0                                         | (17.8-20.2)                                     |
| Statin users***                                                                                                            | 15,000                                        | 279                                                               | 0.6                                          | (-0.1-2.5)                                      |
| Statin non-users                                                                                                           | 242,500                                       | 4,511                                                             | 19.4                                         | (17.6-20.0)                                     |

<sup>§</sup>Assuming patients are followed up for an average of 3 years, and the average rate of CVD in each group is 6.2 per 1000 person years (from pilot data)

\*Assume 20% of patients are using blood pressure lowering treatment[18]

\*\*Assume 5% of adult patients are 80 of over, (ONS Overview of the UK population, 2017)

**Applicants must complete all sections listed below**  
**Sections which do not apply should be completed as 'Not Applicable'**

\*\*\*Assume 40% of patients are eligible for a statin (based on pilot data) and uptake is 15%, based on published information about statin prescriptions, cessation and health care check uptake in the UK[19-21]

**I. Sample size considerations**

See section H.

**J. Data Linkage Required (if applicable):<sup>§</sup>**

*<sup>§</sup>Please note that the data linkage/s requested in research protocols will be published by the CPRD as part of its transparency policy*

Data linkage will be required for:

- Hospital episode statistics (HES): this will improve identification of CVD events by recording those that required hospital admission, but were not identified in primary care records.
- Townsend Score data: Townsend data will give a measure of deprivation at the patient level. This will be used in the calculation of QRISK2.
- Pregnancy register to identify and exclude pregnant women.

**K. Study population**

The study population will be comprised of patients who are over the age of 18, who do not have a diagnosis of cardiovascular disease, who are eligible for HES and IMD linkage, and with at least 12 months of follow-up in CPRD data.

- The start of follow-up will be defined as the latest of: current registration date, up to standard date, first blood pressure measurement, or 1<sup>st</sup> January 2011.
- The end of follow-up will be the earliest of: first cardiovascular disease record, transfer out date, last collection date, or the end of the study period six months prior to the latest available data cut at time of analysis.

The overall start and end of follow-up will also be truncated by the linkage coverage dates.

**Exclusions:**

Pregnant individuals will be excluded, as blood pressure lowering treatment is contraindicated during pregnancy. Patients with existing cardiovascular disease will be excluded: this includes myocardial infarction, stroke, transient ischaemic attack, non-stroke cerebrovascular disease, stable and unstable angina, previous PCI or CABG, heart failure, peripheral arterial disease including intermittent claudication and abdominal aortic aneurysm, procedures indicating repair of peripheral arterial disease and abdominal aortic aneurysm, and codes indicating other CHD.

**L. Selection of comparison group(s) or controls**

**Applicants must complete all sections listed below**  
**Sections which do not apply should be completed as 'Not Applicable'**

There is no control or comparison group. This study will compare the numbers of patients eligible at baseline for treatment under four different approaches, and the subsequent rate of cardiovascular disease, and number of cardiovascular disease events in eligible and ineligible patients.

**M. Exposures, Health Outcomes<sup>§</sup> and Covariates**

<sup>§</sup>Please note: Summary information on health outcomes (as included on the ISAC application form above) will be published on CPRD's website as part of its transparency policy

**Exposures**

Aims 1 & 2

Four different approaches to blood pressure lowering treatment will be investigated:

(i) *Blood pressure alone*

Patients with blood pressures of  $\geq 140/90$  mm Hg will be categorised as eligible for treatment. Patients with isolated systolic blood pressure  $\geq 140$  mm Hg or isolated diastolic blood pressure  $>90$  mm Hg will be categorised as eligible for treatment. Systolic and diastolic blood pressures will be taken from the additional clinical details file.

(ii) *NICE guidance 2011*

- Patients with blood pressures  $\geq 160/100$  mm Hg will be categorised as eligible for treatment.
- Patients with blood pressures between 140/90 and 160/100 mm Hg will be categorised as eligible for treatment if they have target organ damage\*, renal disease, diabetes or a QRISK2 score  $\geq 20\%$  (code lists in appendices).
- Patients with blood pressures below 140/90 mm Hg will be categorised as ineligible for treatment.

(\*Target organ damage will include hypertensive retinopathy, heart failure, proteinuria (code lists in appendices))  
Patients with diabetes will be identified using the same code lists and approach as Mathur et al.[22]

(iii) *QRISK2*

QRISK2 scores will be calculated based on the approach taken by Bhaskaran, Gadd et al (ISAC 17\_008). QRISK2 scores will be calculated using bulk processing software provided by ClinRisk, using the most recent measures available. Variables in QRISK2 include age, sex, ethnicity, blood pressure, deprivation score from linked data, diabetes, family history of coronary heart disease, atrial fibrillation, chronic kidney disease stage 4 or 5, cholesterol/HDL ratio, rheumatoid arthritis, use of blood pressure lowering drugs, BMI (using weight and height records), smoking status (using smoking-related Read codes and structured data on smoking). Time variant variables such as BMI and smoking status will be recorded at cohort entry using the most recent record within one year before the start of follow-up, where available.

Patients with a QRISK2 score of  $\geq 10\%$  (reflecting the same 10% threshold for statin eligibility in primary prevention) will be categorised as eligible for treatment. The study will also explore thresholds of 15% and 20% QRISK2 scores.

(iv) *Age and sex*

Men aged  $\geq 55$  and women aged  $\geq 65$  will be categorised as eligible for treatment. Additional cut offs will also be explored (men aged  $\geq 50$ , women aged  $\geq 60$ , and men aged  $\geq 60$ , women aged  $\geq 70$ ).

Aim 3

Blood pressure, QRISK2, and categories of age will be split into standard groupings:

- Systolic blood pressure; categorised at cohort entry ( $<119$ , 120-139, 140-159, 160-179, 180+ mm Hg)

**Applicants must complete all sections listed below**  
**Sections which do not apply should be completed as 'Not Applicable'**

- Diastolic blood pressure; categorised at cohort entry (<80, 80-89, 90-99, 100-109, 110+mm Hg)
- QRISK2 will be categorised into bands of percentage risk (<10%, 10-19%, 20-29%, 30%+)
- Year of birth; age categorised into 10 year bands at cohort entry (<30, 30-39, 40-49, 50-59, 60-69, 70-79, 80-89, 90+)

### **Outcomes**

Outcomes of interest in aims 2 and 3 are CVD. CVD will be defined as any record of coronary heart disease (myocardial infarction, angina, revascularisation procedures, coronary heart disease not otherwise specified), cerebrovascular disease (stroke, transient ischaemic attack, non-stroke cerebrovascular disease), peripheral arterial disease (including abdominal aortic aneurism, intermittent claudication and their treatment) and heart failure. Cardiovascular outcomes will be ascertained through CPRD and HES linkage. Medical and ICD code lists for cardiovascular disease are provided in appendices.

### **N. Data/ Statistical Analysis**

Statistical analysis will be carried out using STATA MP version 14.2 statistical software.

#### **Aim 1 – eligibility under four different approaches to blood pressure lowering treatment**

Under each treatment approach, eligibility will be determined at cohort entry (latest of 1<sup>st</sup> January 2011, first blood pressure measure, UTS date). The number of patients eligible under each strategy will be calculated and eligibility will be compared between approaches using cross tabulations. Eligible and ineligible patients will be described according to their cardiovascular disease risk factors (variables included in QRISK2).

For the approach using blood pressure thresholds alone (strategy i) and the approach based on NICE guidelines (strategy ii), patients will be additionally categorised according to their use of treatment at cohort entry. This will allow stratification according to control of blood pressure by treatment:

- Controlled blood pressure: on treatment and BP <140/90mm Hg
- Uncontrolled blood pressure: on treatment and BP ≥140/90mm Hg
- Untreated high blood pressure: no treatment and BP ≥140/90mm Hg

#### **Aim 2 – rate and proportion of CVD events occurring during follow-up, by treatment eligibility**

Patients in the cohort will be followed up for the outcome of their first cardiovascular disease event. The total number of events and overall rate of cardiovascular disease will be calculated.

For each treatment approach, the cohort will be split according to treatment eligibility (eligible vs. ineligible) at cohort entry and eligibility will be updated during follow-up when new measures become available. QRISK2 scores will be updated each time a new measure becomes available or every year (to reflect change in age), whichever is sooner. Men and women who reach the age cut offs for treatment in strategy iv will be updated as eligible.

The number of CVD events throughout follow-up will be calculated. The incidence rate of CVD in eligible and ineligible patients will be calculated using the number of events and person-years. The proportion of all CVD events that occur in patients eligible for treatment at the time of their first CVD diagnosis (vs not eligible for treatment at their first CVD diagnosis) will be described and compared across treatment strategies (see **shell table 1** below). An approach using proportions is appropriate for these follow-up data because the whole cohort is followed up for the same period, no matter how the cohort is split.



**Applicants must complete all sections listed below**  
**Sections which do not apply should be completed as 'Not Applicable'**

**Shell table 1. Rate of CVD and proportion of CVD events occurring among eligible patients for each strategy.**

| Strategy                                           | Rate of CVD/1000 person yrs        |                                        | % CVD events during follow-up that occur among patients eligible for treatment |
|----------------------------------------------------|------------------------------------|----------------------------------------|--------------------------------------------------------------------------------|
|                                                    | Among those eligible for treatment | Among those not eligible for treatment |                                                                                |
| Blood pressure only                                |                                    |                                        |                                                                                |
| NICE guideline                                     |                                    |                                        |                                                                                |
| QRISK2 10% cut off                                 |                                    |                                        |                                                                                |
| Age and sex:<br>Age 55 for men<br>Age 65 for women |                                    |                                        |                                                                                |

For the QRISK2-based approach to treatment, analyses will initially be performed for a 10% cut-off. Additional analyses will investigate a 15% and 20% cut-off. For the age/sex-based approach to treatment, analyses will initially be performed for an age 55 cut off for men and age 65 cut off for women. Additional analyses will investigate cut-offs of 50 and 60 for men, and 60 and 70 for women.

**Aim 3 – rate and proportion of CVD events occurring during follow-up, by groups of blood pressure, risk, and age/sex**

For each treatment approach, the cohort will be split into groups at cohort entry, as described in section M, Aim 3. Patients will be able to switch between groups during follow-up to reflect changes in their risk factor profile. In each group, the rate and proportion of CVD events will be calculated and compared across treatment strategies. This analysis will allow us to complete the **shell table 2**.

**Shell table 2. Rate of CVD and proportion of events occurring in each category.**

| Strategy                               | Category | Rate of CVD/1000 person yrs | % of all follow-up events that occur in group |
|----------------------------------------|----------|-----------------------------|-----------------------------------------------|
| <b>Systolic blood pressure, mm Hg</b>  | <119     |                             |                                               |
|                                        | 120-139  |                             |                                               |
|                                        | 140-159  |                             |                                               |
|                                        | 160-179  |                             |                                               |
|                                        | 180+     |                             |                                               |
| <b>Diastolic blood pressure, mm Hg</b> | <80      |                             |                                               |
|                                        | 80-89    |                             |                                               |
|                                        | 90-99    |                             |                                               |
|                                        | 100-109  |                             |                                               |
|                                        | 110+     |                             |                                               |
| <b>QRISK2</b>                          | <10%     |                             |                                               |
|                                        | 10-19%   |                             |                                               |
|                                        | 20-29%   |                             |                                               |

**Applicants must complete all sections listed below**  
**Sections which do not apply should be completed as 'Not Applicable'**

|                          |       |  |  |
|--------------------------|-------|--|--|
|                          | 30%+  |  |  |
| <b>Men: Age, years</b>   | <30   |  |  |
|                          | 30-39 |  |  |
|                          | 40-49 |  |  |
|                          | 50-59 |  |  |
|                          | 60-69 |  |  |
|                          | 70-79 |  |  |
|                          | 80-89 |  |  |
|                          | 90+   |  |  |
| <b>Women: Age, years</b> | <30   |  |  |
|                          | 30-39 |  |  |
|                          | 40-49 |  |  |
|                          | 50-59 |  |  |
|                          | 60-69 |  |  |
|                          | 70-79 |  |  |
|                          | 80-89 |  |  |
|                          | 90+   |  |  |

**Aims 1-3 secondary analyses**

*Investigating use of blood pressure lowering treatment*

As this cohort takes real life patients, some will use blood pressure lowering treatment at cohort entry or will start treatment during follow-up. This will reduce their risk of CVD during follow-up, and will affect the burden of CVD, particularly among the group eligible for treatment under the approach used by NICE.

Therefore, in order to maximise comparability of the burden according to each treatment strategy, for each of the four treatment strategies, patients will be stratified according to their use of blood pressure lowering at cohort entry (for Aim 1) and at the time of event (Aims 2 and 3). The burden of CVD can then be compared across strategies among treated and untreated patients. The rate and burden of CVD will also be assessed according to controlled blood pressure, uncontrolled blood pressure and untreated blood pressure.

*Investigating the impact of age*

The current guidance for blood pressure lowering is slightly different in patients over 80 and advises more caution, given their likelihood of falls. Therefore, eligibility at cohort entry will be stratified by age <80 vs 80+ years for each strategy. The rate and proportion of CVD events will also be stratified by age <80 vs 80+ at the time of the event.

*Investigating statin use*

Many patients in the cohort are likely to use statins. Where there is overlap between statin use and eligibility for blood pressure lowering, the burden of disease will be lower due to statin use. To investigate the impact of statin use on the burden, we will stratify by statin use in a sensitivity analysis. For each of the four treatment strategies, patients will be stratified according to their use of statins at cohort entry (for Aim 1) and at the time of event (Aims 2 and 3). The burden of CVD can then be compared across strategies among treated and untreated patients.

*Investigating different types of CVD*

To further understand the burden of CVD according to each treatment strategy, CVD will be split into two categories in a sensitivity analysis:

- MI and stroke
- Other CVD

**Applicants must complete all sections listed below**  
**Sections which do not apply should be completed as 'Not Applicable'**

**O. Plan for addressing confounding**

This is a descriptive study examining numbers of patients eligible for treatment and their subsequent CVD burden. No causal inference is sought and therefore confounding will not be addressed.

**P. Plans for addressing missing data**

Recording of exposures such as smoking status and BMI are unlikely to be independent of the values of variables themselves, and so does not satisfy the missing at random (MAR) requirement for multiple imputation. Data are more likely to fit the assumption required for complete case analysis (the probability of a variable record being missing is independent of the outcome, given the value of the variable and other covariates) and thus complete case analysis (with respect to BMI, calendar time, smoking status, year of birth, sex and deprivation) will be conducted.

For many variables in this study, the presence or absence of a code will be used to assign patients to one of two groups. Because the absence of a code is an outcome of interest, missing data (i.e. incorrectly absent codes) will not be identifiable, and thus cannot be addressed as part of the study. For example, some patients may have cardiovascular disease which is not coded in their record. This will result in some misclassification of patients who have cardiovascular disease as not having disease.

**Q. Patient or user group involvement (if applicable)**

No patient or user group involvement will occur.

**R. Plans for disseminating and communicating study results, including the presence or absence of any restrictions on the extent and timing of publication**

The study findings will be submitted for publication in peer-reviewed scientific journals, and will be presented at appropriate conferences and other meetings.

**S. Limitations of the study design, data sources, and analytic methods**

The CVD burden will be decreased among patients who take blood pressure lowering drugs. Patients who are eligible under the current NICE treatment approach are more likely to use blood pressure lowering treatment and their subsequent burden of CVD would be expected to be lower than patients who are only eligible under different treatment approaches.

One way of investigating the impact of treatment on the future burden of disease is to compare patients who are eligible for treatment, according to their use of treatment. Evidence shows that only 50% of patients eligible for treatment actually are treated.[23] This will give an indication of burden in both treated and untreated scenarios.

Statin use among the cohort will also influence burden of disease. This will have most impact when eligibility for both statins and blood pressure lowering overlap (strategies based on QRISK2 and age/sex). Therefore, in a sensitivity analysis, we will stratify by statin use.

**T. References**

**Applicants must complete all sections listed below**

**Sections which do not apply should be completed as 'Not Applicable'**

1. Lim, S.S., et al., *A comparative risk assessment of burden of disease and injury attributable to 67 risk factors and risk factor clusters in 21 regions, 1990-2010: a systematic analysis for the Global Burden of Disease Study 2010*. Lancet, 2012. **380**(9859): p. 2224-60.
2. Law, M.R., J.K. Morris, and N.J. Wald, *Use of blood pressure lowering drugs in the prevention of cardiovascular disease: meta-analysis of 147 randomised trials in the context of expectations from prospective epidemiological studies*. Bmj, 2009. **338**: p. b1665.
3. Blood Pressure Lowering Treatment Trialists, C., et al., *Effects of different regimens to lower blood pressure on major cardiovascular events in older and younger adults: meta-analysis of randomised trials*. Bmj, 2008. **336**(7653): p. 1121-3.
4. Krause, T., et al., *Management of hypertension: summary of NICE guidance*. Bmj, 2011. **343**: p. d4891.
5. Lewington, S., et al., *Age-specific relevance of usual blood pressure to vascular mortality: a meta-analysis of individual data for one million adults in 61 prospective studies*. Lancet, 2002. **360**(9349): p. 1903-13.
6. Sundstrom, J., et al., *Effects of blood pressure reduction in mild hypertension: a systematic review and meta-analysis*. Ann Intern Med, 2015. **162**(3): p. 184-91.
7. Ettehad, D., et al., *Blood pressure lowering for prevention of cardiovascular disease and death: a systematic review and meta-analysis*. Lancet, 2015. [http://dx.doi.org/10.1016/S0140-6736\(15\)01225-8](http://dx.doi.org/10.1016/S0140-6736(15)01225-8).
8. Jackson, R., et al., *Treatment with drugs to lower blood pressure and blood cholesterol based on an individual's absolute cardiovascular risk*. Lancet, 2005. **365**(9457): p. 434-441.
9. Hippisley-Cox, J., et al., *Predicting cardiovascular risk in England and Wales: prospective derivation and validation of QRISK2*. Bmj, 2008. **336**(7659): p. 1475-82.
10. Hippisley-Cox, J., C. Coupland, and P. Brindle, *Development and validation of QRISK3 risk prediction algorithms to estimate future risk of cardiovascular disease: prospective cohort study*. Bmj, 2017. **357**: p. j2099.
11. Sundstrom, J., et al., *Blood pressure-lowering treatment based on cardiovascular risk: a meta-analysis of individual patient data*. Lancet, 2014. **384**(9943): p. 591-598.
12. Sussman, J., S. Vijan, and R. Hayward, *Using benefit-based tailored treatment to improve the use of antihypertensive medications*. Circulation, 2013. **128**(21): p. 2309-17.
13. Gaziano, T.A., et al., *Cost-effectiveness analysis of hypertension guidelines in South Africa: absolute risk versus blood pressure level*. Circulation, 2005. **112**(23): p. 3569-76.
14. Karmali, K.N., et al., *Identifying Individuals at Risk for Cardiovascular Events Across the Spectrum of Blood Pressure Levels*. J Am Heart Assoc, 2015. **4**(9): p. e002126.
15. Cobiac, L.J., et al., *Improving the cost-effectiveness of cardiovascular disease prevention in Australia: a modelling study*. BMC Public Health, 2012. **12**: p. 398.
16. Jansen, J., et al., *General practitioners' use of absolute risk versus individual risk factors in cardiovascular disease prevention: an experimental study*. Bmj Open, 2014. **4**(5).
17. Pletcher, M.J., et al., *Comparing impact and cost-effectiveness of primary prevention strategies for lipid-lowering*. Ann Intern Med, 2009. **150**(4): p. 243-54.
18. Rapsomaniki, E., et al., *Blood pressure and incidence of twelve cardiovascular diseases: lifetime risks, healthy life-years lost, and age-specific associations in 1.25 million people*. Lancet, 2014. **383**(9932): p. 1899-911.
19. Vinogradova, Y., et al., *Discontinuation and restarting in patients on statin treatment: prospective open cohort study using a primary care database*. Bmj, 2016. **353**: p. i3305.
20. Chang, K.C., et al., *Coverage of a national cardiovascular risk assessment and management programme (NHS Health Check): Retrospective database study*. Prev Med, 2015. **78**: p. 1-8.
21. Robson, J., et al., *The NHS Health Check in England: an evaluation of the first 4 years*. BMJ Open, 2016. **6**(1): p. e008840.
22. Mathur, R., et al., *Population trends in the 10-year incidence and prevalence of diabetic retinopathy in the UK: a cohort study in the Clinical Practice Research Datalink 2004-2014*. BMJ Open, 2017. **7**(2): p. e014444.
23. Joffres, M., et al., *Hypertension prevalence, awareness, treatment and control in national surveys from England, the USA and Canada, and correlation with stroke and ischaemic heart disease mortality: a cross-sectional study*. BMJ Open, 2013. **3**(8): p. e003423.

**List of Appendices** (Submit all appendices as separate documents to this application)

Appendix 1 – Medical codelist for cardiovascular disease

Appendix 2 – List of cardiovascular disease ICD10 codes and OPCS codes

Appendix 3 – Product codelist for blood pressure lowering prescriptions

Appendix 4 – Medical codelists for chronic kidney disease and target organ damage (proteinuria, hypertensive retinopathy, left ventricular hypertrophy)

**Applicants must complete all sections listed below**  
**Sections which do not apply should be completed as 'Not Applicable'**

Appendix 5 – Product codelist for statin prescriptions

**Amendment 23/01/2019**

**Study Title**

Eligibility for blood pressure lowering treatment and subsequent cardiovascular disease burden under three different treatment approaches: a cohort study

**Objectives, Specific Aims and Rationale**

Throughout the analysis, approach (iv) (age and sex) has been dropped.

**Study Design**

This is now a closed cohort. If patients do not meet inclusion criteria on 1<sup>st</sup> January 2011, then they are excluded from the study.

**K. Study Population**

The study population will be comprised of patients who are aged 30-79 on 1<sup>st</sup> January 2011, who do not have a diagnosis of cardiovascular disease, who are eligible for HES and IMD linkage, and with at least 12 months of follow-up in CPRD data.

- The start of follow-up will be defined as 1<sup>st</sup> January 2011.
- The end of follow-up will be the earliest of: first cardiovascular disease record, transfer out date, last collection date, or the end of the study period six months prior to the latest available data cut at time of analysis.

Exclusion criteria as described in original ISAC protocol above.

**M. Exposures, Health Outcomes and Co-variates**

**Applicants must complete all sections listed below**  
**Sections which do not apply should be completed as 'Not Applicable'**

Aims 1 and 2

The definition of the blood pressure only approach has been updated. This is now:

Either most recent recorded blood pressure to cohort entry  $\geq 140$ mmHg systolic or  $\geq 90$ mmHg diastolic,

Or using blood pressure lowering treatment at cohort entry, with either:

- two previous blood pressure measures  $\geq 140/90$  mmHg (systolic or diastolic above threshold) within a two year period,
- a hypertension diagnosis
- a flag on the general practice hypertension register

Aim 3

A new category of systolic blood pressure has been added ( $< 110$ mmHg) and a new category of diastolic blood pressure has been added ( $< 70$ mmHg).

Systolic and diastolic blood pressure now have the following categories:

- Systolic blood pressure; categorised at cohort entry ( $< 110$ , 110-119, 120-139, 140-159, 160-179, 180+mm Hg)
- Diastolic blood pressure; categorised at cohort entry ( $< 70$ , 70-79, 80-89, 90-99, 100-109, 110+mm Hg)

QRISK2 scores, systolic blood pressure and diastolic blood pressures will also be split into quintile values for this aim.

Outcomes in the main analysis will be coronary heart disease and cerebrovascular disease, measured using data from CPRD, HES and ONS. Heart failure and peripheral arterial disease will no longer be included, to align the analysis with outcomes included in QRISK2.

**N. Statistical Analysis**

The date at which treatment eligibility will be calculated is 1<sup>st</sup> January 2011 for all patients.

Control of blood pressure: treatment and control of blood pressure is now investigated for all strategies and categories have been updated as follows:

- Treated at cohort entry, and BP  $< 140/90$ mm Hg (controlled)
- Treated at cohort entry, and BP  $\geq 140/90$ mm Hg (uncontrolled)
- Untreated at cohort entry, and BP  $< 140/90$ mm Hg
- Untreated at cohort entry, and BP  $\geq 140/90$ mm Hg

New analyses

- The number of patients treated to avoid one event will be calculated for each strategy by dividing the number of patients eligible for treatment by the number of events avoided if all eligible patients were treated for ten years.
- In Aim 3, the rate and proportion of events will be described by quintile of QRISK2 score, systolic blood pressure and diastolic blood pressure.

Additional sensitivity analyses:

In the main analysis, patients with very high and very low blood pressures were treated in the same way as patients with normal blood pressure, which may not reflect a safe approach to treatment, as treating very low blood

**Applicants must complete all sections listed below**

**Sections which do not apply should be completed as 'Not Applicable'**

pressures could result in falls, and very high blood pressures do require treatment. Therefore in this sensitivity analysis, very high and very low blood pressures will be additionally used to define eligibility under each strategy. Patients will be defined as not eligible for treatment if blood pressure was  $<120/70$ mmHg and eligible for treatment if blood pressure was  $>170/110$ mmHg.

In the main analysis, patients were included if they had a blood pressure measure in the five years before cohort entry. To account for any misclassification in blood pressures, this period will be restricted to one year in sensitivity analysis.

Patients with diabetes will be excluded in a sensitivity analysis, as their treatment guidelines are different to patients without diabetes.

## RECORD statement

The RECORD statement – checklist of items, extended from the STROBE statement, that should be reported in observational studies using routinely collected health data.

|                           | Item No. | STROBE items                                                                                                                                                                                                                                                                                                                                                                                                                                                                                                                                                                                                                                                                                              | Location in manuscript where items are reported | RECORD items                                                                                                                                                                                                                                                                                                                                                                                                                                                                                                                                                                                                                                                                                  | Location in manuscript where items are reported |
|---------------------------|----------|-----------------------------------------------------------------------------------------------------------------------------------------------------------------------------------------------------------------------------------------------------------------------------------------------------------------------------------------------------------------------------------------------------------------------------------------------------------------------------------------------------------------------------------------------------------------------------------------------------------------------------------------------------------------------------------------------------------|-------------------------------------------------|-----------------------------------------------------------------------------------------------------------------------------------------------------------------------------------------------------------------------------------------------------------------------------------------------------------------------------------------------------------------------------------------------------------------------------------------------------------------------------------------------------------------------------------------------------------------------------------------------------------------------------------------------------------------------------------------------|-------------------------------------------------|
| <b>Title and abstract</b> |          |                                                                                                                                                                                                                                                                                                                                                                                                                                                                                                                                                                                                                                                                                                           |                                                 |                                                                                                                                                                                                                                                                                                                                                                                                                                                                                                                                                                                                                                                                                               |                                                 |
|                           | 1        | (a) Indicate the study's design with a commonly used term in the title or the abstract (b) Provide in the abstract an informative and balanced summary of what was done and what was found                                                                                                                                                                                                                                                                                                                                                                                                                                                                                                                | Page 3                                          | RECORD 1.1: The type of data used should be specified in the title or abstract. When possible, the name of the databases used should be included.<br><br>RECORD 1.2: If applicable, the geographic region and timeframe within which the study took place should be reported in the title or abstract.<br><br>RECORD 1.3: If linkage between databases was conducted for the study, this should be clearly stated in the title or abstract.                                                                                                                                                                                                                                                   | Page 3<br><br>Page 3<br><br>Page 3              |
| <b>Introduction</b>       |          |                                                                                                                                                                                                                                                                                                                                                                                                                                                                                                                                                                                                                                                                                                           |                                                 |                                                                                                                                                                                                                                                                                                                                                                                                                                                                                                                                                                                                                                                                                               |                                                 |
| Background rationale      | 2        | Explain the scientific background and rationale for the investigation being reported                                                                                                                                                                                                                                                                                                                                                                                                                                                                                                                                                                                                                      | Page 4                                          |                                                                                                                                                                                                                                                                                                                                                                                                                                                                                                                                                                                                                                                                                               |                                                 |
| Objectives                | 3        | State specific objectives, including any prespecified hypotheses                                                                                                                                                                                                                                                                                                                                                                                                                                                                                                                                                                                                                                          | Page 5-6                                        |                                                                                                                                                                                                                                                                                                                                                                                                                                                                                                                                                                                                                                                                                               |                                                 |
| <b>Methods</b>            |          |                                                                                                                                                                                                                                                                                                                                                                                                                                                                                                                                                                                                                                                                                                           |                                                 |                                                                                                                                                                                                                                                                                                                                                                                                                                                                                                                                                                                                                                                                                               |                                                 |
| Study Design              | 4        | Present key elements of study design early in the paper                                                                                                                                                                                                                                                                                                                                                                                                                                                                                                                                                                                                                                                   | Page 7                                          |                                                                                                                                                                                                                                                                                                                                                                                                                                                                                                                                                                                                                                                                                               |                                                 |
| Setting                   | 5        | Describe the setting, locations, and relevant dates, including periods of recruitment, exposure, follow-up, and data collection                                                                                                                                                                                                                                                                                                                                                                                                                                                                                                                                                                           | Page 7                                          |                                                                                                                                                                                                                                                                                                                                                                                                                                                                                                                                                                                                                                                                                               |                                                 |
| Participants              | 6        | (a) <i>Cohort study</i> - Give the eligibility criteria, and the sources and methods of selection of participants. Describe methods of follow-up<br><i>Case-control study</i> - Give the eligibility criteria, and the sources and methods of case ascertainment and control selection. Give the rationale for the choice of cases and controls<br><i>Cross-sectional study</i> - Give the eligibility criteria, and the sources and methods of selection of participants<br><br>(b) <i>Cohort study</i> - For matched studies, give matching criteria and number of exposed and unexposed<br><i>Case-control study</i> - For matched studies, give matching criteria and the number of controls per case | Page 7                                          | RECORD 6.1: The methods of study population selection (such as codes or algorithms used to identify subjects) should be listed in detail. If this is not possible, an explanation should be provided.<br><br>RECORD 6.2: Any validation studies of the codes or algorithms used to select the population should be referenced. If validation was conducted for this study and not published elsewhere, detailed methods and results should be provided.<br><br>RECORD 6.3: If the study involved linkage of databases, consider use of a flow diagram or other graphical display to demonstrate the data linkage process, including the number of individuals with linked data at each stage. | Page 7, Appendices                              |
| Variables                 | 7        | Clearly define all outcomes, exposures, predictors, potential confounders, and effect modifiers. Give diagnostic criteria, if applicable.                                                                                                                                                                                                                                                                                                                                                                                                                                                                                                                                                                 | Page 8                                          | RECORD 7.1: A complete list of codes and algorithms used to classify exposures, outcomes, confounders, and effect modifiers should be provided. If these cannot be reported, an explanation should be provided.                                                                                                                                                                                                                                                                                                                                                                                                                                                                               | Appendices                                      |



|                                  |    |                                                                                                                                                                                                                                                                                                                                                                                                                                                                                                                                                                      |                                                                                          |                                                                                                                                                                                                                                                                                                                    |                   |
|----------------------------------|----|----------------------------------------------------------------------------------------------------------------------------------------------------------------------------------------------------------------------------------------------------------------------------------------------------------------------------------------------------------------------------------------------------------------------------------------------------------------------------------------------------------------------------------------------------------------------|------------------------------------------------------------------------------------------|--------------------------------------------------------------------------------------------------------------------------------------------------------------------------------------------------------------------------------------------------------------------------------------------------------------------|-------------------|
| Data sources/<br>measurement     | 8  | For each variable of interest, give sources of data and details of methods of assessment (measurement).<br>Describe comparability of assessment methods if there is more than one group                                                                                                                                                                                                                                                                                                                                                                              | Page 8, Table 1, appendices                                                              |                                                                                                                                                                                                                                                                                                                    |                   |
| Bias                             | 9  | Describe any efforts to address potential sources of bias                                                                                                                                                                                                                                                                                                                                                                                                                                                                                                            | Page 7, inclusion and exclusion criteria, Sensitivity analyses, Page 15 Discussion       |                                                                                                                                                                                                                                                                                                                    |                   |
| Study size                       | 10 | Explain how the study size was arrived at                                                                                                                                                                                                                                                                                                                                                                                                                                                                                                                            | Appendix Figure 1                                                                        |                                                                                                                                                                                                                                                                                                                    |                   |
| Quantitative variables           | 11 | Explain how quantitative variables were handled in the analyses. If applicable, describe which groupings were chosen, and why                                                                                                                                                                                                                                                                                                                                                                                                                                        | Page 9                                                                                   |                                                                                                                                                                                                                                                                                                                    |                   |
| Statistical methods              | 12 | (a) Describe all statistical methods, including those used to control for confounding<br>(b) Describe any methods used to examine subgroups and interactions<br>(c) Explain how missing data were addressed<br>(d) <i>Cohort study</i> - If applicable, explain how loss to follow-up was addressed<br><i>Case-control study</i> - If applicable, explain how matching of cases and controls was addressed<br><i>Cross-sectional study</i> - If applicable, describe analytical methods taking account of sampling strategy<br>(e) Describe any sensitivity analyses | Pages 8-9                                                                                |                                                                                                                                                                                                                                                                                                                    |                   |
| Data access and cleaning methods |    | ..                                                                                                                                                                                                                                                                                                                                                                                                                                                                                                                                                                   |                                                                                          | RECORD 12.1: Authors should describe the extent to which the investigators had access to the database population used to create the study population.<br><br>RECORD 12.2: Authors should provide information on the data cleaning methods used in the study.                                                       | Page 22           |
| Linkage                          |    | ..                                                                                                                                                                                                                                                                                                                                                                                                                                                                                                                                                                   |                                                                                          | RECORD 12.3: State whether the study included person-level, institutional-level, or other data linkage across two or more databases. The methods of linkage and methods of linkage quality evaluation should be provided.                                                                                          | n/a               |
| <b>Results</b>                   |    |                                                                                                                                                                                                                                                                                                                                                                                                                                                                                                                                                                      |                                                                                          |                                                                                                                                                                                                                                                                                                                    |                   |
| Participants                     | 13 | (a) Report the numbers of individuals at each stage of the study ( <i>e.g.</i> , numbers potentially eligible, examined for eligibility, confirmed eligible, included in the study, completing follow-up, and analysed)<br>(b) Give reasons for non-participation at each stage.<br>(c) Consider use of a flow diagram                                                                                                                                                                                                                                               |                                                                                          | RECORD 13.1: Describe in detail the selection of the persons included in the study ( <i>i.e.</i> , study population selection) including filtering based on data quality, data availability and linkage. The selection of included persons can be described in the text and/or by means of the study flow diagram. | Appendix Figure 1 |
| Descriptive data                 | 14 | (a) Give characteristics of study participants ( <i>e.g.</i> , demographic, clinical, social) and information on exposures and potential confounders<br>(b) Indicate the number of participants with missing data for each variable of interest<br>(c) <i>Cohort study</i> - summarise follow-up time ( <i>e.g.</i> , average and total amount)                                                                                                                                                                                                                      | Table 2 and Appendix Table 1<br><br>Table 2 and Appendix Table 1<br><br>Results, Page 10 |                                                                                                                                                                                                                                                                                                                    |                   |
| Outcome data                     | 15 | <i>Cohort study</i> - Report numbers of outcome events or summary measures over time                                                                                                                                                                                                                                                                                                                                                                                                                                                                                 | Results Page 10                                                                          |                                                                                                                                                                                                                                                                                                                    |                   |

|                                                           |    |                                                                                                                                                                                                                                                                                                                                                                                                                                |             |                                                                                                                                                                                                                                                                                                          |            |
|-----------------------------------------------------------|----|--------------------------------------------------------------------------------------------------------------------------------------------------------------------------------------------------------------------------------------------------------------------------------------------------------------------------------------------------------------------------------------------------------------------------------|-------------|----------------------------------------------------------------------------------------------------------------------------------------------------------------------------------------------------------------------------------------------------------------------------------------------------------|------------|
|                                                           |    | <p><i>Case-control study</i> - Report numbers in each exposure category, or summary measures of exposure</p> <p><i>Cross-sectional study</i> - Report numbers of outcome events or summary measures</p>                                                                                                                                                                                                                        |             |                                                                                                                                                                                                                                                                                                          |            |
| Main results                                              | 16 | <p>(a) Give unadjusted estimates and, if applicable, confounder-adjusted estimates and their precision (e.g., 95% confidence interval). Make clear which confounders were adjusted for and why they were included</p> <p>(b) Report category boundaries when continuous variables were categorized</p> <p>(c) If relevant, consider translating estimates of relative risk into absolute risk for a meaningful time period</p> | Pages 10-12 |                                                                                                                                                                                                                                                                                                          |            |
| Other analyses                                            | 17 | Report other analyses done—e.g., analyses of subgroups and interactions, and sensitivity analyses                                                                                                                                                                                                                                                                                                                              | Pages 12-13 |                                                                                                                                                                                                                                                                                                          |            |
| <b>Discussion</b>                                         |    |                                                                                                                                                                                                                                                                                                                                                                                                                                |             |                                                                                                                                                                                                                                                                                                          |            |
| Key results                                               | 18 | Summarise key results with reference to study objectives                                                                                                                                                                                                                                                                                                                                                                       | Page 13     |                                                                                                                                                                                                                                                                                                          |            |
| Limitations                                               | 19 | Discuss limitations of the study, taking into account sources of potential bias or imprecision. Discuss both direction and magnitude of any potential bias                                                                                                                                                                                                                                                                     | Page 15-16  | RECORD 19.1: Discuss the implications of using data that were not created or collected to answer the specific research question(s). Include discussion of misclassification bias, unmeasured confounding, missing data, and changing eligibility over time, as they pertain to the study being reported. | Page 15-16 |
| Interpretation                                            | 20 | Give a cautious overall interpretation of results considering objectives, limitations, multiplicity of analyses, results from similar studies, and other relevant evidence                                                                                                                                                                                                                                                     | Pages 17    |                                                                                                                                                                                                                                                                                                          |            |
| Generalisability                                          | 21 | Discuss the generalisability (external validity) of the study results                                                                                                                                                                                                                                                                                                                                                          | Page 15     |                                                                                                                                                                                                                                                                                                          |            |
| <b>Other Information</b>                                  |    |                                                                                                                                                                                                                                                                                                                                                                                                                                |             |                                                                                                                                                                                                                                                                                                          |            |
| Funding                                                   | 22 | Give the source of funding and the role of the funders for the present study and, if applicable, for the original study on which the present article is based                                                                                                                                                                                                                                                                  | Page 21     |                                                                                                                                                                                                                                                                                                          |            |
| Accessibility of protocol, raw data, and programming code |    | ..                                                                                                                                                                                                                                                                                                                                                                                                                             |             | RECORD 22.1: Authors should provide information on how to access any supplemental information such as the study protocol, raw data, or programming code.                                                                                                                                                 | Page 22    |

\*Reference: Benchimol EI, Smeeth L, Guttman A, Harron K, Moher D, Petersen I, Sørensen HT, von Elm E, Langan SM, the RECORD Working Committee. The Reporting of studies Conducted using Observational Routinely-collected health Data (RECORD) Statement. *PLoS Medicine* 2015; in press.

\*Checklist is protected under Creative Commons Attribution ([CC BY](https://creativecommons.org/licenses/by/4.0/)) license.
